# Supplementary material for: Next-Generation Sequence Analysis of Cancer Xenograft Models
Source: PLoS One. 2013 Sep 26;8(9):e74432. doi: 10.1371/journal.pone.0074432 (PMC3784448; doi:10.1371/journal.pone.0074432)
Supplement: Dataset S1 — Detected copy number variations in the NCI-H209 cell line sample. (PDF) [file pone.0074432.s009.pdf]

## Sheet: CNVs cell line
Dataset S1. Detected copy number variations in the NCI-H209 cell line sample
Chromosome	Start	End	Predicted copy no.	Alteration type	Uncertainty of type predicted genotype (%)	Status	Germline CAN/LOH (%)
1	561990	572208	28	gain	100	germline	1
1	827658	2217306	1	loss	-1	somatic	0
1	2217306	2268396	1	loss	-1	somatic	0
1	2268396	2585154	1	loss	-1	somatic	0
1	2585154	2615808	5	gain	8.70006	germline	1
1	2615808	16818828	1	loss	-1	somatic	0
1	16818828	16829046	1	loss	-1	somatic	0
1	16880136	16982316	4	gain	0.812538	germline	1
1	17207112	17288856	1	loss	-1	somatic	0
1	17288856	17350164	1	loss	-1	somatic	0
1	17350164	29182608	1	loss	-1	somatic	0
1	29182608	29274570	1	loss	-1	somatic	0
1	30265716	31379478	4	gain	0.427288	somatic	0
1	31379478	33443514	4	gain	0.397083	somatic	0
1	33443514	35323626	4	gain	0.370639	somatic	0
1	35323626	36795018	4	gain	1.0032	somatic	0
1	36795018	37888344	4	gain	0.662245	somatic	0
1	37888344	41147886	4	gain	0.307391	somatic	0
1	41147886	41158104	4	gain	-1	somatic	0
1	41158104	41219412	4	gain	100	somatic	0
1	41219412	41239848	4	gain	-1	somatic	0
1	41239848	41403336	4	gain	6.00773	somatic	0
1	42598842	42813420	4	gain	3.84501	somatic	0
1	42813420	44478954	3	gain	0.151777	somatic	0
1	44478954	44509608	4	gain	48.9875	somatic	0
1	44509608	48780732	1	loss	-1	somatic	0
1	48780732	48811386	1	loss	-1	somatic	0
1	48811386	48831822	3	gain	-1	somatic	0
1	48831822	49148580	3	gain	1.40936	somatic	0
1	49148580	49169016	3	gain	-1	somatic	0
1	49169016	49843404	3	gain	7.70015	somatic	0
1	49843404	49853622	3	gain	-1	somatic	0
1	49853622	51508938	3	gain	0.373655	somatic	0
1	51508938	51927876	1	loss	-1	somatic	0
1	51927876	52030056	1	loss	-1	somatic	0
1	52030056	54635646	1	loss	-1	somatic	0
1	54635646	54696954	1	loss	-1	somatic	0
1	77932686	78658164	2	normal	18.9637	somatic	0
1	91849602	91859820	11	gain	36.2865	germline	1
1	120531528	120633708	5	gain	2.80824	germline	1
1	121348968	121389840	8	gain	2.21302	germline	1
1	121389840	121471584	2	normal	12.9863	somatic	0
1	143123526	143276796	4	gain	0.189064	germline	1
1	143276796	143287014	28	gain	26.6976	germline	1
1	143287014	143348322	4	gain	-1	germline	1
1	143348322	143419848	3	gain	0.425729	germline	1
1	143419848	143542464	6	gain	0.115987	germline	1
1	143542464	143644644	6	gain	-1	germline	1
1	143644644	143726388	1	loss	-1	germline	1
1	143726388	144216852	3	gain	0.258201	somatic	0
1	144216852	144278160	3	gain	-1	somatic	0
1	144278160	144523392	1	loss	-1	germline	1
1	144523392	144554046	6	gain	0.755764	germline	1
1	144554046	144983202	4	gain	1.21939	germline	1
1	144983202	145126254	8	gain	0.428366	germline	1
1	145126254	145187562	4	gain	7.9374	germline	1
1	145187562	145371486	5	gain	1.76356	somatic	0
1	147997512	148017948	7	gain	6.01259	germline	1
1	148845606	149039748	6	gain	0.317058	germline	1
1	149264544	149315634	5	gain	3.23191	germline	1
1	151369452	151481850	2	normal	100	germline	1
1	158174640	158910336	2	normal	31.0385	somatic	0
1	161413746	161444400	8	gain	7.01159	germline	1
1	196727154	196819116	0	loss	-1	germline	1
1	196819116	197156310	2	normal	68.2175	somatic	0
1	228740148	228781020	5	gain	-1	somatic	0
2	7111728	7162818	2	normal	100	somatic	0
2	15551796	15674412	2	normal	63.0458	somatic	0
2	19965972	20057934	2	normal	33.3801	somatic	0
2	25085190	25892412	1	loss	-1	somatic	0
2	25892412	25933284	1	loss	-1	somatic	0
2	25933284	25943502	1	loss	-1	somatic	0
2	32462586	32707818	2	normal	100	somatic	0
2	34690110	34741200	1	loss	-1	somatic	0
2	81233100	81447678	2	normal	100	somatic	0
2	86658858	86904090	2	normal	44.5676	somatic	0
2	87578478	87588696	6	gain	5.31166	germline	1
2	87588696	87619350	3	gain	1.2061	germline	1
2	87619350	87741966	0	loss	-1	germline	1
2	89836656	89887746	5	gain	13.6218	germline	1
2	90378210	90398646	9	gain	2.48765	germline	1
2	90398646	90480390	4	gain	0.931276	germline	1
2	91594152	91614588	12	gain	9.42296	germline	1
2	91614588	91696332	4	gain	0.462051	germline	1
2	91716768	91737204	3	gain	1.19234	germline	1
2	91737204	91747422	7	gain	11.242	germline	1
2	91747422	91757640	3	gain	2.08459	germline	1
2	91757640	91829166	10	gain	1.43632	germline	1
2	91829166	91931346	5	gain	0.321548	germline	1
2	91931346	92013090	3	gain	0.230502	germline	1
2	92013090	92217450	3	gain	0.148747	germline	1
2	92217450	92268540	4	gain	0.610907	germline	1
2	92268540	92319630	35	gain	9.30531	germline	1
2	96580536	96631626	3	gain	0.268216	germline	1
2	96999474	97173180	2	normal	63.6606	germline	1
2	106379598	106461342	2	normal	100	somatic	0
2	120316950	120470220	2	normal	21.235	somatic	0
2	128654838	128767236	2	normal	100	germline	1
2	132762474	132813564	3	gain	0.504427	germline	1
2	132997488	133038360	10	gain	0.657588	germline	1
2	133038360	133120104	4	gain	0.42864	germline	1
2	162129006	162139224	6	gain	2.30392	germline	1
2	177496878	177629712	2	normal	31.5796	somatic	0
2	178334754	178917180	2	normal	26.6517	somatic	0
2	187326594	187438992	2	normal	28.0314	somatic	0
2	188552754	188634498	2	normal	68.7156	somatic	0
2	192231234	192527556	2	normal	11.6288	somatic	0
2	194530284	194939004	2	normal	62.4324	germline	1
2	196461486	197033694	2	normal	14.8624	somatic	0
2	211900884	212340258	2	normal	23.5022	somatic	0
3	0	613080	1	loss	-1	somatic	0
3	664170	13518414	1	loss	-1	somatic	0
3	13518414	13610376	1	loss	-1	somatic	0
3	13610376	14274546	1	loss	-1	somatic	0
3	14274546	14325636	1	loss	-1	somatic	0
3	14325636	18790902	1	loss	-1	somatic	0
3	18790902	18811338	1	loss	-1	somatic	0
3	18811338	28722798	1	loss	-1	somatic	0
3	28722798	28773888	1	loss	-1	somatic	0
3	28773888	29386968	1	loss	-1	somatic	0
3	29386968	29427840	1	loss	-1	somatic	0
3	29427840	75122736	1	loss	-1	somatic	0
3	75122736	75132954	1	loss	-1	somatic	0
3	75132954	75674508	1	loss	-1	somatic	0
3	75674508	75684726	3	gain	0.997334	germline	1
3	75684726	75705162	5	gain	0.497218	germline	1
3	75705162	75715380	3	gain	0.473893	germline	1
3	75715380	75756252	6	gain	0.245283	germline	1
3	75909522	75981048	1	loss	-1	somatic	0
3	75981048	76001484	3	gain	0.429955	germline	1
3	76001484	86628204	1	loss	-1	somatic	0
3	86628204	86679294	1	loss	-1	somatic	0
3	86679294	89284884	1	loss	-1	somatic	0
3	89284884	89387064	1	loss	-1	somatic	0
3	89387064	90500826	1	loss	-1	somatic	0
3	93504918	93525354	2	normal	24.4092	somatic	0
3	105981096	105991314	3	gain	-1	somatic	0
3	105991314	106083276	3	gain	7.56032	somatic	0
3	107595540	108842136	3	gain	0.206093	somatic	0
3	108842136	108934098	3	gain	26.246	somatic	0
3	108934098	108974970	3	gain	100	somatic	0
3	109240638	111999498	3	gain	0.120769	somatic	0
3	111999498	112520616	4	gain	17.4207	somatic	0
3	112520616	114339420	3	gain	0.236129	somatic	0
3	127755654	128113284	2	normal	100	somatic	0
3	130933452	131423916	1	loss	-1	somatic	0
3	138719568	138811530	2	normal	100	somatic	0
3	138811530	138831966	2	normal	41.0623	somatic	0
3	140221614	140446410	2	normal	100	somatic	0
3	141917802	141979110	2	normal	100	somatic	0
3	162507072	162629688	1	loss	-1	germline	1
3	173726436	174124938	2	normal	39.6812	somatic	0
3	174829980	174870852	1	loss	-1	somatic	0
3	174870852	174952596	1	loss	-1	somatic	0
3	174952596	176005050	1	loss	-1	somatic	0
3	176005050	176066358	1	loss	-1	somatic	0
3	195204672	195235326	4	gain	4.95739	germline	1
3	195347724	195419250	1	loss	-1	germline	1
3	196624974	196635192	21	gain	9.0495	germline	1
3	197820480	197830698	4	gain	13.4988	germline	1
4	0	10218	6	gain	-1	germline	1
4	10218	20436	3	gain	5.28079	germline	1
4	20436	71526	6	gain	1.92639	germline	1
4	3576300	3637608	4	gain	0.652479	germline	1
4	9216636	9369906	6	gain	47.1929	germline	1
4	10207782	10238436	1	loss	-1	germline	1
4	44509608	44938764	2	normal	15.2117	germline	1
4	49087272	49128144	18	gain	67.0745	germline	1
4	49128144	49138362	3	gain	8.00257	germline	1
4	49138362	49169016	9	gain	1.32271	germline	1
4	49169016	49250760	4	gain	0.275913	germline	1
4	49250760	49332504	14	gain	10.269	germline	1
4	49332504	49495992	3	gain	-1	germline	1
4	49495992	49506210	3	gain	1.76861	germline	1
4	49506210	49547082	7	gain	61.4185	germline	1
4	49547082	49628826	3	gain	0.210575	germline	1
4	57557994	57782790	2	normal	36.8836	somatic	0
4	62534160	62697648	2	normal	100	somatic	0
4	68256240	68266458	12	gain	14.9739	germline	1
4	69175860	69278040	2	normal	100	somatic	0
4	69380220	69492618	0	loss	-1	germline	1
4	78790998	78944268	2	normal	72.8155	somatic	0
4	91471536	92237886	1	loss	1.11841	somatic	0
4	92237886	92248104	1	loss	-1	somatic	0
4	92248104	92432028	1	loss	-1	somatic	0
4	92432028	92472900	2	normal	100	somatic	0
4	95916366	96038982	2	normal	100	somatic	0
4	106144584	106318290	2	normal	39.2724	germline	1
4	112152768	113419800	4	gain	0.367273	somatic	0
4	113419800	113736558	3	gain	0.859876	somatic	0
4	113736558	114359856	4	gain	0.665412	somatic	0
4	114359856	116526072	3	gain	0.0931885	somatic	0
4	116526072	123995430	3	gain	0.0281613	somatic	0
4	123995430	124005648	3	gain	-1	somatic	0
4	124005648	124128264	3	gain	7.5058	somatic	0
4	124128264	124148700	3	gain	-1	somatic	0
4	124148700	124312188	3	gain	8.83765	somatic	0
4	125650746	126846252	2	normal	57.8497	somatic	0
4	126846252	131045850	2	normal	5.60532	somatic	0
4	131056068	131505660	2	normal	31.4825	somatic	0
4	131587404	132578550	3	gain	0.306688	somatic	0
4	132578550	132670512	4	gain	2.71953	somatic	0
4	132670512	132680730	6	gain	9.89002	somatic	0
4	132680730	133252938	3	gain	0.335265	somatic	0
4	133252938	133508388	3	gain	18.6396	somatic	0
4	133508388	133518606	3	gain	-1	somatic	0
4	133518606	133876236	3	gain	0.383167	somatic	0
4	133876236	134009070	4	gain	14.2168	somatic	0
4	137145996	137197086	2	normal	100	germline	1
4	151297926	152166456	2	normal	46.3093	somatic	0
4	159952572	160197804	2	normal	17.3088	germline	1
4	167217570	167248224	2	normal	100	germline	1
4	169250952	169332696	2	normal	72.8155	somatic	0
4	190095672	190146762	2	normal	100	somatic	0
4	190473738	190678098	6	gain	0.0811834	somatic	0
4	190800714	190821150	6	gain	0.779172	germline	1
4	190821150	190882458	4	gain	2.72598	germline	1
4	190882458	191015292	3	gain	0.157412	somatic	0
4	191015292	191035728	4	gain	6.2617	germline	1
4	191035728	191154276	3	gain	-1	germline	1
5	0	10218	3	gain	-1	germline	1
5	10218	20436	9	gain	14.0194	germline	1
5	20436	7070856	3	gain	0.0254201	somatic	0
5	7070856	16645122	3	gain	0.0276086	somatic	0
5	16645122	17513652	3	gain	0.294293	somatic	0
5	17513652	17605614	12	gain	65.8988	germline	1
5	17605614	21478236	3	gain	0.0575914	somatic	0
5	21478236	21498672	11	gain	11.8891	germline	1
5	21498672	21529326	4	gain	10.3184	germline	1
5	21529326	21570198	6	gain	3.78518	germline	1
5	21570198	24032736	3	gain	0.141397	somatic	0
5	24032736	24839958	3	gain	0.721408	somatic	0
5	24839958	31399914	3	gain	0.0325774	somatic	0
5	31399914	32656728	4	gain	0.169221	somatic	0
5	32656728	34179210	4	gain	0.302492	somatic	0
5	34179210	34199646	22	gain	50.16	germline	1
5	34199646	36171720	4	gain	0.340155	somatic	0
5	36171720	36406734	5	gain	0.918922	somatic	0
5	36406734	36999378	3	gain	0.471226	somatic	0
5	36999378	37571586	3	gain	1.2439	somatic	0
5	37571586	46399938	3	gain	0.0301178	somatic	0
5	46399938	49414248	3	gain	-1	somatic	0
5	49414248	49444902	18	gain	42.2421	germline	1
5	49444902	68828448	1	loss	-1	somatic	0
5	68828448	68869320	1	loss	-1	germline	1
5	68869320	75020556	1	loss	-1	somatic	0
5	75020556	75061428	1	loss	-1	somatic	0
5	75061428	89121396	1	loss	-1	somatic	0
5	89121396	94771950	0	loss	-1	somatic	0
5	94771950	98920458	1	loss	-1	somatic	0
5	98920458	98951112	1	loss	-1	somatic	0
5	98951112	115575798	1	loss	-1	somatic	0
5	115575798	115729068	1	loss	-1	somatic	0
5	115729068	127060830	1	loss	-1	somatic	0
5	127060830	127398024	5	gain	11.916	somatic	0
5	127398024	132057432	2	normal	4.30444	somatic	0
5	132057432	134254302	2	normal	6.1624	somatic	0
5	134254302	134264520	5	gain	3.42503	germline	1
5	137125560	161781594	2	normal	3.63026	somatic	0
5	166911030	169976430	2	normal	11.9923	somatic	0
5	169976430	170477112	2	normal	36.1005	somatic	0
6	61308	143052	2	normal	31.1138	somatic	0
6	143052	296322	3	gain	1.23876	somatic	0
6	296322	388284	5	gain	0.846236	germline	1
6	388284	3320850	3	gain	0.0675346	somatic	0
6	3320850	3596736	4	gain	0.472552	somatic	0
6	3596736	9053148	3	gain	0.0386004	somatic	0
6	9053148	9063366	3	gain	-1	somatic	0
6	9063366	9492522	3	gain	100	somatic	0
6	9492522	9502740	3	gain	-1	somatic	0
6	9502740	14897844	3	gain	0.0498692	somatic	0
6	14897844	15255474	2	normal	1.73847	somatic	0
6	15255474	17094714	3	gain	0.132299	somatic	0
6	17094714	18382182	3	gain	0.26268	somatic	0
6	18382182	20854938	3	gain	0.108145	somatic	0
6	20854938	20906028	3	gain	-1	somatic	0
6	20906028	22265022	3	gain	0.205362	somatic	0
6	22265022	22275240	2	normal	100	somatic	0
6	22336548	24063390	2	normal	16.2993	somatic	0
6	24063390	24921702	3	gain	0.534936	somatic	0
6	24921702	26668980	3	gain	0.103571	somatic	0
6	26668980	26709852	5	gain	16.5212	somatic	0
6	26709852	32452368	3	gain	0.0183796	somatic	0
6	32452368	32646510	1	loss	-1	germline	1
6	32646510	33627438	3	gain	0.0627512	somatic	0
6	33627438	34107684	3	gain	0.381746	somatic	0
6	34107684	36130848	3	gain	0.125292	somatic	0
6	36130848	36212592	3	gain	-1	somatic	0
6	36212592	36611094	3	gain	0.844549	somatic	0
6	36611094	41699658	3	gain	0.0517732	somatic	0
6	41699658	43630860	3	gain	0.165751	somatic	0
6	43630860	44151978	3	gain	0.397575	somatic	0
6	44151978	55238508	3	gain	0.0254966	somatic	0
6	55238508	55432650	3	gain	100	somatic	0
6	55432650	55637010	3	gain	1.21446	somatic	0
6	55637010	55902678	3	gain	100	somatic	0
6	55902678	55912896	3	gain	-1	somatic	0
6	55912896	57200364	3	gain	0.168584	somatic	0
6	57200364	57363852	5	gain	0.051229	germline	1
6	57363852	57486468	7	gain	0.55442	germline	1
6	57486468	57568212	9	gain	0.190106	germline	1
6	57568212	57609084	5	gain	0.19195	germline	1
6	57609084	62483070	3	gain	0.0872147	somatic	0
6	62503506	62738520	3	gain	30.3055	somatic	0
6	62738520	62748738	3	gain	-1	somatic	0
6	62748738	63811410	3	gain	0.156171	somatic	0
6	63811410	65487162	3	gain	0.288913	somatic	0
6	65487162	65497380	3	gain	-1	somatic	0
6	65497380	65650650	3	gain	77.1836	somatic	0
6	65650650	65660868	3	gain	-1	somatic	0
6	65660868	73651344	3	gain	0.0315664	somatic	0
6	73651344	73733088	3	gain	-1	somatic	0
6	73733088	73906794	3	gain	2.91779	somatic	0
6	73906794	74591400	2	normal	1.47216	somatic	0
6	74591400	74601618	0	loss	-1	somatic	0
6	74601618	74938812	3	gain	9.02286	somatic	0
6	74938812	74949030	3	gain	-1	somatic	0
6	74949030	77850942	3	gain	0.0899265	somatic	0
6	77850942	77881596	3	gain	-1	somatic	0
6	77881596	78024648	3	gain	34.5607	somatic	0
6	78024648	79802580	3	gain	0.108249	somatic	0
6	79802580	82847544	3	gain	0.0556296	somatic	0
6	82847544	83951088	3	gain	0.273104	somatic	0
6	83951088	83981742	3	gain	-1	somatic	0
6	83981742	90633660	3	gain	0.0320772	somatic	0
6	90633660	91818948	3	gain	0.152938	somatic	0
6	112827156	112837374	1	loss	100	somatic	0
6	112837374	112857810	1	loss	-1	somatic	0
6	112857810	114257676	1	loss	-1	somatic	0
6	114257676	114267894	1	loss	-1	somatic	0
6	129799254	129850344	2	normal	100	somatic	0
6	145841514	146434158	2	normal	91.3662	somatic	0
6	161035680	161066334	6	gain	9.80295	germline	1
6	170701908	170712126	5	gain	4.90105	germline	1
6	171008448	171049320	3	gain	2.5644	somatic	0
7	10218	20436	2	normal	16.2292	somatic	0
7	20436	30654	4	gain	39.8977	somatic	0
7	33106320	33208500	2	normal	100	germline	1
7	42864510	43099524	2	normal	26.6901	somatic	0
7	44846802	44989854	1	loss	-1	somatic	0
7	51999402	52735098	2	normal	36.52	somatic	0
7	52735098	52745316	1	loss	-1	somatic	0
7	55739190	55800498	1	loss	-1	somatic	0
7	55800498	55810716	1	loss	-1	somatic	0
7	55810716	56321616	1	loss	-1	somatic	0
7	56321616	56382924	1	loss	-1	somatic	0
7	56382924	56434014	1	loss	-1	somatic	0
7	56434014	56444232	14	gain	79.0961	germline	1
7	56444232	57578430	1	loss	-1	somatic	0
7	61072986	61103640	5	gain	4.75564	germline	1
7	61103640	61236474	1	loss	-1	somatic	0
7	61236474	61246692	6	gain	21.4141	germline	1
7	61246692	61461270	1	loss	-1	germline	1
7	61563450	61665630	1	loss	-1	germline	1
7	61665630	61808682	3	gain	0.165874	germline	1
7	61808682	61829118	6	gain	1.22917	germline	1
7	61829118	61910862	3	gain	0.303199	germline	1
7	61910862	61972170	3	gain	-1	germline	1
7	61972170	61982388	9	gain	6.74973	germline	1
7	61982388	62053914	1	loss	-1	somatic	0
7	62053914	62094786	1	loss	-1	somatic	0
7	62094786	62871354	1	loss	-1	somatic	0
7	62871354	62891790	1	loss	-1	somatic	0
7	62891790	63331164	1	loss	-1	somatic	0
7	63331164	63504870	1	loss	-1	somatic	0
7	63504870	64404054	1	loss	-1	somatic	0
7	64404054	64424490	1	loss	-1	somatic	0
7	64424490	64792338	1	loss	-1	somatic	0
7	64792338	64945608	1	loss	-1	somatic	0
7	64945608	76808706	1	loss	-1	somatic	0
7	76808706	76880232	1	loss	-1	somatic	0
7	76880232	88120032	1	loss	-1	somatic	0
7	88120032	88232430	1	loss	-1	somatic	0
7	88232430	93034890	1	loss	-1	somatic	0
7	93034890	93065544	1	loss	-1	somatic	0
7	93065544	96856422	1	loss	-1	somatic	0
7	96856422	96887076	1	loss	-1	somatic	0
7	96887076	97571682	1	loss	-1	somatic	0
7	97571682	97602336	1	loss	-1	somatic	0
7	97602336	100637082	1	loss	-1	somatic	0
7	100637082	100647300	4	gain	25.9199	germline	1
7	100647300	101505612	1	loss	-1	somatic	0
7	101505612	101526048	1	loss	-1	somatic	0
7	101526048	101883678	1	loss	-1	somatic	0
7	101883678	101893896	1	loss	-1	somatic	0
7	101893896	102547848	1	loss	-1	somatic	0
7	102547848	102568284	1	loss	-1	somatic	0
7	102568284	107421834	1	loss	-1	somatic	0
7	107421834	107442270	1	loss	-1	somatic	0
7	107442270	107830554	1	loss	-1	somatic	0
7	116372802	116464764	2	normal	100	somatic	0
7	120429348	121400058	1	loss	-1	somatic	0
7	121400058	121430712	2	normal	100	somatic	0
7	122401422	122922540	3	gain	0.293259	somatic	0
7	126192300	126560148	2	normal	22.6989	somatic	0
7	143910312	144073800	3	gain	1.00802	germline	1
7	151962096	151992750	4	gain	1.90095	germline	1
7	152094930	152115366	5	gain	0.625374	germline	1
8	153270	2196870	3	gain	0.0621544	somatic	0
8	2196870	2288832	5	gain	0.421331	germline	1
8	2288832	7019766	3	gain	0.0272294	somatic	0
8	7183254	7397832	3	gain	0.462763	somatic	0
8	7397832	7622628	1	loss	-1	germline	1
8	7796334	7990476	1	loss	-1	somatic	0
8	7990476	8062002	3	gain	0.65999	germline	1
8	8062002	8092656	1	loss	12.7871	somatic	0
8	8092656	11893752	3	gain	0.0401385	somatic	0
8	11893752	11975496	1	loss	-1	germline	1
8	11975496	12077676	3	gain	0.735678	somatic	0
8	12251382	12394434	3	gain	0.462765	somatic	0
8	12394434	12455742	7	gain	0.8365	germline	1
8	12455742	15398526	3	gain	0.0503726	somatic	0
8	15398526	15408744	3	gain	-1	somatic	0
8	15408744	15449616	3	gain	100	somatic	0
8	15449616	15459834	3	gain	-1	somatic	0
8	15459834	15797028	3	gain	1.20234	somatic	0
8	15797028	16706430	3	gain	0.31011	somatic	0
8	16706430	16747302	3	gain	-1	somatic	0
8	16747302	18576324	3	gain	0.106577	somatic	0
8	18576324	18882864	3	gain	5.20768	somatic	0
8	18882864	19066788	3	gain	0.77559	somatic	0
8	20650578	20793630	2	normal	37.3748	somatic	0
8	23797722	23818158	1	loss	-1	somatic	0
8	23818158	24073608	2	normal	48.0133	somatic	0
8	35926488	35977578	2	normal	100	somatic	0
8	40769820	40923090	2	normal	32.6681	somatic	0
8	43528680	43549116	1	loss	-1	somatic	0
8	43549116	43784130	2	normal	10.1901	somatic	0
8	43784130	43794348	7	gain	42.1251	germline	1
8	43794348	43814784	2	normal	33.6837	germline	1
8	43814784	46859748	2	normal	-1	somatic	0
8	46859748	48402666	2	normal	40.2876	somatic	0
8	48423102	48566154	2	normal	100	somatic	0
8	57210582	57261672	2	normal	56.0629	somatic	0
8	58119984	58130202	6	gain	6.34046	germline	1
8	60633612	60684702	2	normal	100	germline	1
8	64404054	64577760	2	normal	90.349	germline	1
8	66294384	66406782	2	normal	60.9512	somatic	0
8	68378856	68501472	4	gain	5.42326	somatic	0
8	68501472	75316878	3	gain	0.0357358	somatic	0
8	75316878	75357750	3	gain	24.3379	somatic	0
8	75357750	79894542	3	gain	0.0796481	somatic	0
8	79894542	80037594	3	gain	-1	somatic	0
8	80037594	82265118	3	gain	0.13625	somatic	0
8	82265118	82336644	3	gain	-1	somatic	0
8	82336644	82571658	3	gain	54.8649	somatic	0
8	82571658	82592094	3	gain	-1	somatic	0
8	82592094	86434062	3	gain	0.0598198	somatic	0
8	86434062	86485152	3	gain	-1	somatic	0
8	86485152	86546460	2	normal	100	germline	1
8	86546460	86842782	18	gain	0.97845	germline	1
8	86842782	88171122	3	gain	0.194214	somatic	0
8	88171122	88242648	3	gain	-1	somatic	0
8	88242648	88334610	3	gain	77.9109	somatic	0
8	88355046	88876164	3	gain	0.577907	somatic	0
8	88876164	89979708	3	gain	0.246672	somatic	0
8	89979708	90010362	3	gain	-1	somatic	0
8	90010362	90204504	3	gain	8.86285	somatic	0
8	90204504	90357774	3	gain	-1	somatic	0
8	90357774	97806696	3	gain	0.0415234	somatic	0
8	97806696	97847568	3	gain	-1	somatic	0
8	97847568	98011056	3	gain	53.3878	somatic	0
8	98011056	98041710	3	gain	-1	somatic	0
8	98041710	100095528	3	gain	0.169692	somatic	0
8	100095528	100105746	3	gain	-1	somatic	0
8	100105746	100483812	3	gain	8.76423	somatic	0
8	100483812	100555338	3	gain	-1	somatic	0
8	100555338	104152074	3	gain	0.0990232	somatic	0
8	104152074	104162292	3	gain	-1	somatic	0
8	104162292	104356434	3	gain	38.5189	somatic	0
8	104356434	108106440	3	gain	0.0830561	somatic	0
8	108106440	108126876	3	gain	-1	somatic	0
8	108126876	108280146	3	gain	25.2355	somatic	0
8	108280146	108290364	3	gain	-1	somatic	0
8	108290364	109066932	3	gain	0.260461	somatic	0
8	109066932	109097586	2	normal	100	somatic	0
8	109097586	109107804	3	gain	-1	somatic	0
8	109107804	109383690	3	gain	15.0058	somatic	0
8	109383690	109465434	3	gain	100	somatic	0
8	109465434	109680012	3	gain	3.56344	somatic	0
8	109680012	109710666	3	gain	73.0136	somatic	0
8	109710666	110844864	3	gain	0.318859	somatic	0
8	110844864	112500180	3	gain	0.352522	somatic	0
8	112500180	112551270	3	gain	-1	somatic	0
8	112551270	114737922	3	gain	0.117689	somatic	0
8	114737922	114809448	3	gain	24.3379	somatic	0
8	114809448	114840102	3	gain	-1	somatic	0
8	114840102	125098974	3	gain	0.031021	somatic	0
8	125098974	125129628	3	gain	36.5068	somatic	0
8	125129628	125262462	3	gain	1.11917	somatic	0
8	125262462	125405514	3	gain	76.5499	somatic	0
8	125405514	125415732	3	gain	-1	somatic	0
8	125415732	125957286	3	gain	0.355155	somatic	0
8	125957286	125977722	3	gain	-1	somatic	0
8	125977722	126304698	3	gain	100	somatic	0
8	126314916	139547226	3	gain	0.0196123	somatic	0
8	139547226	144043146	3	gain	0.0422616	somatic	0
8	144043146	145187562	3	gain	0.20888	somatic	0
8	145187562	145504320	1	loss	-1	somatic	0
8	145504320	146301324	3	gain	0.276851	somatic	0
8	146301324	146364022	3	gain	-1	somatic	0
9	8705736	8746608	2	normal	69.6451	somatic	0
9	16941444	17493216	2	normal	9.83444	somatic	0
9	26832468	27363804	2	normal	47.8857	somatic	0
9	38777310	38838618	1	loss	-1	germline	1
9	39186030	40739166	1	loss	-1	somatic	0
9	40841346	41893800	1	loss	-1	germline	1
9	44070234	44080452	4	gain	6.01861	germline	1
9	44478954	44857020	1	loss	-1	germline	1
9	44989854	45000072	4	gain	16.0869	somatic	0
9	45000072	45245304	1	loss	-1	germline	1
9	45357702	45378138	4	gain	0.916586	germline	1
9	45480318	45674460	1	loss	17.3451	somatic	0
9	45674460	45735768	3	gain	0.341721	germline	1
9	45735768	46614516	1	loss	-1	germline	1
9	46910838	47166288	1	loss	-1	germline	1
9	47166288	47217378	3	gain	1.21484	germline	1
9	47217378	66192204	1	loss	-1	germline	1
9	66345474	66396564	1	loss	-1	germline	1
9	66396564	66457872	8	gain	-1	germline	1
9	66457872	66519180	8	gain	2.07542	germline	1
9	66519180	66539616	5	gain	57.624	germline	1
9	66795066	66805284	10	gain	10.5301	germline	1
9	66805284	66815502	2	normal	100	somatic	0
9	66815502	66835938	14	gain	60.1643	germline	1
9	66835938	66856374	5	gain	2.28741	germline	1
9	67244658	67367274	3	gain	0.31313	germline	1
9	67367274	67775994	1	loss	-1	germline	1
9	68348202	68389074	4	gain	1.02033	germline	1
9	68389074	68440164	9	gain	0.328587	germline	1
9	68440164	68481036	4	gain	0.642599	germline	1
9	68481036	68501472	6	gain	0.61777	germline	1
9	68501472	68736486	3	gain	0.147681	germline	1
9	68991936	69002154	5	gain	2.2148	germline	1
9	69002154	69073680	3	gain	0.161133	germline	1
9	69574362	69727632	1	loss	-1	somatic	0
9	69727632	69799158	2	normal	7.62358	somatic	0
9	69799158	69850248	4	gain	0.878051	germline	1
9	72292350	72384312	2	normal	78.5937	germline	1
9	73324368	73365240	1	loss	-1	somatic	0
9	76246716	76655436	2	normal	37.2624	germline	1
9	80425878	80609802	2	normal	51.2287	somatic	0
9	87271938	87445644	2	normal	49.4512	somatic	0
9	91093470	91175214	1	loss	-1	somatic	0
9	97551246	97684080	2	normal	100	germline	1
9	101423868	101515830	2	normal	32.6681	somatic	0
9	115821030	115851684	3	gain	5.97979	somatic	0
9	120572400	120797196	2	normal	100	germline	1
9	123464094	123596928	2	normal	19.1863	somatic	0
9	125405514	125865324	2	normal	31.0204	somatic	0
9	127847616	127970232	3	gain	3.05762	somatic	0
9	130534950	130586040	2	normal	100	somatic	0
9	130718874	130841490	2	normal	34.9838	somatic	0
9	131822418	132026778	2	normal	16.0975	somatic	0
9	134305392	134356482	2	normal	54.5684	somatic	0
9	141059490	141120798	3	gain	0.78296	somatic	0
9	141120798	141131016	5	gain	13.6146	somatic	0
9	141131016	141151452	2	normal	75.3161	germline	1
9	141151452	141213431	3	gain	-1	somatic	0
10	61308	91962	3	gain	12.764	somatic	0
10	12813372	12823590	3	gain	36.2545	somatic	0
10	17779320	18218694	1	loss	-1	germline	1
10	18821556	18872646	1	loss	54.5684	somatic	0
10	32125392	32278662	2	normal	43.0288	somatic	0
10	38807964	38818182	5	gain	79.2486	germline	1
10	42353610	42384264	25	gain	100	germline	1
10	42384264	42394482	715	gain	100	germline	1
10	42394482	42414918	121	gain	100	germline	1
10	42527316	42609060	105	gain	100	germline	1
10	42609060	42639714	3	gain	0.940922	germline	1
10	42639714	42660150	6	gain	0.792571	germline	1
10	42660150	42680586	4	gain	2.82882	germline	1
10	46277322	46910838	1	loss	-1	germline	1
10	46951710	47145852	4	gain	0.370348	germline	1
10	47145852	47156070	3	gain	17.6121	germline	1
10	47156070	47319558	1	loss	-1	germline	1
10	47707842	48300486	1	loss	-1	germline	1
10	48668334	49363158	1	loss	-1	germline	1
10	51192180	51396540	1	loss	-1	somatic	0
10	51641772	51723516	1	loss	-1	somatic	0
10	51835914	51999402	1	loss	-1	somatic	0
10	54349542	54410850	2	normal	64.5431	somatic	0
10	68072316	68113188	1	loss	-1	germline	1
10	76032138	76308024	2	normal	26.2234	somatic	0
10	81376152	81508986	1	loss	-1	somatic	0
10	96222906	96795114	2	normal	100	somatic	0
10	109158894	109332600	2	normal	100	somatic	0
10	111171840	111406854	2	normal	100	germline	1
10	111406854	111529470	2	normal	60.2338	germline	1
10	113143914	113338056	2	normal	25.3416	germline	1
10	115851684	116015172	2	normal	70.5547	somatic	0
10	123525402	123760416	2	normal	31.0207	somatic	0
10	124342842	124373496	1	loss	-1	somatic	0
10	127571730	127592166	8	gain	1.7309	germline	1
10	127592166	127612602	4	gain	11.4847	germline	1
10	130259064	130269282	4	gain	90.2563	somatic	0
10	135419154	135490680	3	gain	0.453715	somatic	0
10	135490680	135521334	6	gain	2.67244	somatic	0
10	135521334	135534747	3	gain	-1	somatic	0
11	183924	194142	5	gain	1.56979	germline	1
11	194142	1001364	3	gain	0.847962	somatic	0
11	1001364	3269760	3	gain	0.0819993	somatic	0
11	3269760	3361722	1	loss	-1	germline	1
11	3361722	8041566	3	gain	0.0413739	somatic	0
11	8041566	8092656	3	gain	100	somatic	0
11	8092656	9175764	3	gain	0.329663	somatic	0
11	9564048	10320180	3	gain	0.626739	somatic	0
11	10320180	17033406	3	gain	0.0324986	somatic	0
11	17391036	18218694	3	gain	0.211407	somatic	0
11	18218694	18709158	2	normal	1.30478	somatic	0
11	18944172	18964608	4	gain	20.3907	germline	1
11	33116538	33310680	2	normal	68.1885	germline	1
11	51090000	51192180	1	loss	-1	germline	1
11	51560028	51570246	6	gain	15.2503	germline	1
11	51570246	51590682	25	gain	7.64036	germline	1
11	54696954	54799134	1	loss	-1	germline	1
11	55361124	55463304	1	loss	-1	germline	1
11	57925842	58303908	2	normal	13.2432	somatic	0
11	85177248	85442916	2	normal	99.2261	somatic	0
11	92084616	92636388	3	gain	0.401984	somatic	0
11	93964728	93974946	7	gain	72.1197	germline	1
12	0	61308	3	gain	-1	germline	1
12	61308	183924	3	gain	0.475223	germline	1
12	888966	1328340	1	loss	-1	somatic	0
12	8562684	8593338	0	loss	-1	germline	1
12	9635574	9737754	0	loss	-1	germline	1
12	11219364	11250018	0	loss	-1	germline	1
12	11505468	11546340	1	loss	-1	germline	1
12	14652612	14846754	2	normal	43.0288	somatic	0
12	19260930	19393764	2	normal	29.1212	somatic	0
12	31267080	31359042	3	gain	1.10589	germline	1
12	31359042	31399914	3	gain	4.70388	germline	1
12	34833162	34843380	4	gain	2.73877	somatic	0
12	41239848	41433990	2	normal	20.0579	somatic	0
12	60613176	60858408	2	normal	28.0041	somatic	0
12	62881572	62942880	2	normal	100	somatic	0
12	65793702	65844792	2	normal	100	somatic	0
12	78320970	78515112	2	normal	33.2584	somatic	0
12	81396588	81825744	2	normal	100	germline	1
12	91277394	91696332	2	normal	20.9815	somatic	0
12	119652780	120000192	3	gain	2.86259	somatic	0
13	19342674	19363110	0	loss	-1	germline	1
13	20538180	20630142	2	normal	100	somatic	0
13	22254804	23225514	2	normal	100	somatic	0
13	23225514	26137644	2	normal	9.98815	somatic	0
13	28436694	28896504	2	normal	100	somatic	0
13	38072268	38082486	0	loss	-1	somatic	0
13	41096796	41934672	2	normal	21.1021	somatic	0
13	44550480	45040944	2	normal	100	somatic	0
13	46072962	46829094	2	normal	15.383	somatic	0
13	46829094	50701716	2	normal	9.81651	somatic	0
13	52612482	53337960	2	normal	100	somatic	0
13	54850224	57711264	2	normal	39.1832	somatic	0
13	57711264	57721482	4	gain	27.2867	germline	1
13	57721482	57741918	5	gain	-1	germline	1
13	57741918	57752136	4	gain	100	germline	1
13	57752136	63607050	2	normal	100	somatic	0
13	63607050	63647922	3	gain	0.142618	germline	1
13	70402020	70412238	1	loss	-1	somatic	0
13	70412238	73477638	2	normal	36.8995	somatic	0
13	73477638	73814832	2	normal	36.8676	somatic	0
13	80742636	91134342	2	normal	7.43694	somatic	0
13	91134342	107718156	2	normal	2.72512	somatic	0
13	112939554	112970208	4	gain	36.2562	germline	1
14	0	19005480	4	gain	-1	germline	1
14	19005480	19046352	5	gain	1.1724	germline	1
14	19046352	19128096	4	gain	4.50494	germline	1
14	20333820	20425782	2	normal	16.8733	somatic	0
14	26863122	26985738	2	normal	100	somatic	0
14	32605638	32697600	2	normal	56.2673	somatic	0
14	38899926	38961234	2	normal	56.0629	somatic	0
14	40902654	40974180	2	normal	72.8155	somatic	0
14	42220776	42230994	2	normal	100	somatic	0
14	45827730	46869966	2	normal	0.955188	somatic	0
14	46900620	46910838	3	gain	100	somatic	0
14	46921056	47237814	2	normal	100	somatic	0
14	47237814	47258250	3	gain	-1	somatic	0
14	50987820	51008256	2	normal	54.5684	somatic	0
14	51008256	51059346	3	gain	-1	somatic	0
14	51059346	52939458	3	gain	0.476137	somatic	0
14	53685372	55289598	3	gain	0.162275	somatic	0
14	56004858	57231018	3	gain	0.162621	somatic	0
14	57231018	57312762	2	normal	37.3753	somatic	0
14	57322980	63842064	3	gain	0.125946	somatic	0
14	64506234	64557324	2	normal	100	somatic	0
14	66192204	66989208	3	gain	0.562584	somatic	0
14	66989208	71750796	3	gain	0.277401	somatic	0
14	71750796	72026682	2	normal	100	somatic	0
14	72047118	73385676	2	normal	0.700302	somatic	0
14	73436766	73559382	2	normal	60.2338	somatic	0
14	73998756	74029410	0	loss	-1	germline	1
14	74857068	74887722	3	gain	26.2587	somatic	0
14	74887722	74897940	3	gain	-1	somatic	0
14	74897940	74959248	3	gain	18.3498	somatic	0
14	74959248	75010338	3	gain	-1	somatic	0
14	75010338	76369332	2	normal	1.00653	somatic	0
14	76420422	77810070	3	gain	0.713203	somatic	0
14	78320970	79261026	3	gain	0.243072	somatic	0
14	79261026	79373424	2	normal	9.1932	somatic	0
14	80139774	80149992	3	gain	-1	somatic	0
14	84921798	90184068	3	gain	0.157546	somatic	0
14	90184068	90204504	3	gain	-1	somatic	0
14	90204504	90224940	3	gain	73.0136	somatic	0
14	90224940	91277394	2	normal	0.970267	somatic	0
14	91277394	91318266	2	normal	100	somatic	0
14	91389792	95231760	3	gain	0.227297	somatic	0
14	95466774	100821006	3	gain	0.168464	somatic	0
14	100821006	100902750	3	gain	97.2606	somatic	0
14	100902750	102323052	3	gain	0.182672	somatic	0
14	104438178	106338726	3	gain	0.190318	somatic	0
14	106348944	106400034	3	gain	-1	somatic	0
14	106400034	106532868	2	normal	3.57097	somatic	0
14	106532868	106573740	1	loss	-1	germline	1
14	106798536	106829190	4	gain	1.84521	germline	1
14	107145948	107186820	5	gain	0.242372	germline	1
14	107186820	107289000	3	gain	2.1175	somatic	0
14	107289000	107349540	3	gain	-1	somatic	0
15	20098806	20149896	3	gain	0.560515	germline	1
15	20395128	20446218	4	gain	2.84942	germline	1
15	20446218	20527962	4	gain	1.06092	germline	1
15	20527962	20548398	3	gain	1.21798	germline	1
15	20548398	20630142	5	gain	1.80775	somatic	0
15	20844720	20875374	5	gain	0.894551	germline	1
15	21284094	21396492	1	loss	-1	somatic	0
15	21396492	21886956	3	gain	-1	germline	1
15	21886956	21897174	3	gain	1.5475	germline	1
15	21897174	21938046	5	gain	1.16888	germline	1
15	21938046	22173060	3	gain	0.306295	germline	1
15	22295676	22500036	4	gain	2.37109	germline	1
15	22500036	22694178	3	gain	0.396217	somatic	0
15	24676470	24727560	1	loss	-1	germline	1
15	30388332	30899232	1	loss	-1	somatic	0
15	32462586	32912178	1	loss	4.5489	somatic	0
15	35119266	35262318	2	normal	100	somatic	0
15	48617244	48678552	2	normal	100	somatic	0
15	55197636	55371342	2	normal	61.0758	somatic	0
15	72517146	73528728	2	normal	86.5394	somatic	0
15	74356386	74387040	3	gain	6.3603	germline	1
15	75551892	75562110	3	gain	9.20549	germline	1
15	75562110	75572328	5	gain	6.33636	germline	1
15	75572328	75592764	3	gain	16.7327	germline	1
15	82581876	83215392	1	loss	-1	somatic	0
15	84850272	84870708	4	gain	6.32489	germline	1
15	88120032	88303956	2	normal	63.6606	somatic	0
15	99972912	100003566	2	normal	100	somatic	0
15	102292398	102302616	4	gain	100	germline	1
15	102486540	102517194	3	gain	1.6487	germline	1
16	2155998	2217306	1	loss	-1	somatic	0
16	2217306	2237742	1	loss	-1	somatic	0
16	2237742	3647826	1	loss	-1	somatic	0
16	3647826	3893058	0	loss	-1	somatic	0
16	3893058	3903276	1	loss	-1	somatic	0
16	14989806	15122640	3	gain	1.699	somatic	0
16	21508890	21590634	3	gain	2.64959	germline	1
16	22489818	22622652	3	gain	2.90576	germline	1
16	22622652	22714614	4	gain	5.49313	germline	1
16	30194190	30204408	3	gain	74.1514	somatic	0
16	30204408	30306588	3	gain	10.6798	somatic	0
16	32094738	32156046	3	gain	0.42885	germline	1
16	32156046	32329752	2	normal	4.63712	somatic	0
16	32329752	32564766	3	gain	0.0836572	somatic	0
16	32564766	32656728	3	gain	0.813375	germline	1
16	32656728	32809998	2	normal	7.4754	germline	1
16	32809998	32850870	5	gain	2.28048	germline	1
16	32850870	33034794	2	normal	34.909	germline	1
16	33034794	33055230	5	gain	5.99671	germline	1
16	33055230	33106320	3	gain	1.08549	germline	1
16	33106320	33320898	2	normal	22.9577	germline	1
16	33320898	33423078	4	gain	0.829036	germline	1
16	33423078	33515040	3	gain	0.299993	germline	1
16	33515040	33555912	4	gain	68.8282	germline	1
16	33555912	33627438	3	gain	0.713941	germline	1
16	33913542	33985068	11	gain	0.972591	germline	1
16	33985068	34199646	3	gain	0.257318	somatic	0
16	46389720	46440810	120	gain	3.07806	germline	1
16	46440810	46502118	4	gain	0.51404	germline	1
16	46502118	46839312	2	normal	100	germline	1
16	58048458	58457178	2	normal	10.315	somatic	0
16	62656776	62769174	2	normal	41.0623	somatic	0
16	67949700	68297112	1	loss	-1	somatic	0
16	68297112	68470818	1	loss	-1	somatic	0
16	68470818	69911556	1	loss	-1	somatic	0
16	69911556	69972864	1	loss	-1	somatic	0
16	69972864	70759650	1	loss	-1	somatic	0
16	70759650	70769868	1	loss	-1	somatic	0
16	70769868	70882266	1	loss	-1	somatic	0
16	70882266	71199024	3	gain	0.110152	germline	1
16	71199024	71209242	1	loss	-1	somatic	0
16	71209242	71311422	1	loss	-1	somatic	0
16	71311422	72425184	1	loss	-1	somatic	0
16	72425184	72476274	2	normal	56.0629	somatic	0
16	88641150	88682022	2	normal	100	somatic	0
16	90163632	90286248	3	gain	3.85295	somatic	0
16	90286248	90354753	3	gain	-1	somatic	0
17	21192132	21222786	3	gain	0.226985	germline	1
17	21222786	21253440	5	gain	0.385564	germline	1
17	21304530	21355620	5	gain	0.178838	germline	1
17	21508890	21539544	3	gain	0.284497	germline	1
17	21539544	21559980	6	gain	0.521218	germline	1
17	21672378	21692814	3	gain	0.491725	germline	1
17	21897174	21907392	14	gain	41.9881	germline	1
17	22244586	22254804	40	gain	76.4882	germline	1
17	25269114	25309986	6	gain	0.266764	germline	1
17	25309986	25340640	3	gain	0.438132	germline	1
17	25340640	34485750	2	normal	12.1004	somatic	0
17	34485750	34506186	3	gain	8.08472	germline	1
17	34506186	34567494	1	loss	-1	germline	1
17	34567494	34587930	3	gain	11.4066	germline	1
17	34587930	34669674	1	loss	-1	somatic	0
17	34730982	34761636	4	gain	4.1152	germline	1
17	36284118	36314772	6	gain	9.03711	germline	1
17	36314772	36406734	5	gain	3.4667	germline	1
17	36406734	38583168	2	normal	23.118	somatic	0
17	41393118	41403336	6	gain	63.1146	germline	1
17	43589988	43600206	4	gain	-1	germline	1
17	49649262	51008256	2	normal	12.9914	somatic	0
17	55289598	55340688	3	gain	74.1514	somatic	0
17	56617938	60429252	2	normal	96.5436	somatic	0
17	60429252	61226256	3	gain	3.82562	somatic	0
17	61226256	65221494	2	normal	100	somatic	0
17	65221494	66314820	2	normal	27.4331	somatic	0
17	66314820	72884994	2	normal	6.19185	somatic	0
17	72884994	74816196	2	normal	88.0546	somatic	0
17	77493312	77636364	1	loss	-1	germline	1
17	81182010	81192228	1	loss	-1	germline	1
17	81192228	81195210	0	loss	-1	germline	1
18	0	10218	6	gain	-1	somatic	0
18	10218	102180	6	gain	71.82	somatic	0
18	102180	112398	99	gain	24.9388	germline	1
18	112398	1144416	7	gain	0.326799	somatic	0
18	1144416	2503410	3	gain	0.108308	somatic	0
18	2503410	2922348	3	gain	0.341171	somatic	0
18	2922348	2942784	3	gain	-1	somatic	0
18	2942784	2983656	3	gain	100	somatic	0
18	2983656	2993874	3	gain	-1	somatic	0
18	2993874	3801096	3	gain	0.184919	somatic	0
18	15163512	15183948	4	gain	1.74249	germline	1
18	15183948	15388308	2	normal	5.25941	germline	1
18	15388308	15408744	4	gain	1.59756	germline	1
18	18515016	18525234	111	gain	100	germline	1
18	18525234	18545670	3	gain	96.6606	germline	1
18	20282730	20354256	3	gain	-1	somatic	0
18	20354256	20436000	3	gain	48.8328	somatic	0
18	20436000	20476872	2	normal	64.5431	germline	1
18	22275240	22316112	2	normal	100	somatic	0
18	30470076	30551820	3	gain	100	somatic	0
18	30562038	30889014	3	gain	31.749	somatic	0
18	37377444	37418316	3	gain	-1	somatic	0
18	38879490	39145158	2	normal	33.1555	somatic	0
18	40565460	40606332	3	gain	-1	somatic	0
18	43436718	43589988	2	normal	46.4224	somatic	0
18	43589988	43712604	2	normal	68.9573	somatic	0
18	44540262	44560698	10	gain	26.4259	germline	1
18	44560698	48310704	3	gain	0.287898	somatic	0
18	50722152	50793678	2	normal	100	germline	1
18	52244634	52305942	2	normal	40.1159	germline	1
18	63126804	63177894	2	normal	100	germline	1
18	72558018	72629544	2	normal	100	germline	1
18	72629544	72956520	3	gain	2.53022	somatic	0
18	72956520	72966738	3	gain	-1	somatic	0
18	72987174	73385676	3	gain	4.38355	somatic	0
18	73385676	73712652	2	normal	3.38817	somatic	0
18	75643854	76767834	2	normal	0.660575	somatic	0
18	76767834	76778052	4	gain	4.35055	germline	1
18	77370696	77380914	5	gain	5.14404	germline	1
19	61308	91962	2	normal	100	somatic	0
19	91962	112398	4	gain	17.4269	germline	1
19	112398	255450	2	normal	8.61062	somatic	0
19	7305870	7346742	1	loss	-1	somatic	0
19	8572902	8603556	2	normal	56.0629	somatic	0
19	8848788	8899878	6	gain	3.50392	germline	1
19	10616502	11035440	2	normal	31.0175	somatic	0
19	20497308	20722104	1	loss	-1	germline	1
19	20762976	20854938	2	normal	47.3572	somatic	0
19	21049080	21100170	3	gain	8.64874	somatic	0
19	21253440	21324966	2	normal	100	somatic	0
19	23879466	24042954	2	normal	31.8326	somatic	0
19	24512982	24615162	4	gain	1.03475	germline	1
19	24615162	24625380	6	gain	33.3858	germline	1
19	27731652	27741870	321	gain	100	somatic	0
19	27833832	27895140	5	gain	0.184594	germline	1
19	28242552	28344732	2	normal	100	germline	1
19	36764364	36795018	5	gain	21.8284	germline	1
19	36795018	36805236	4	gain	-1	germline	1
19	37142430	37377444	2	normal	100	somatic	0
19	37765728	37796382	4	gain	20.0659	germline	1
19	43702386	43763694	1	loss	-1	germline	1
19	48412884	48463974	3	gain	42.0304	germline	1
19	50599536	50640408	5	gain	14.5537	germline	1
19	51662208	51723516	2	normal	100	somatic	0
19	52132236	52152672	0	loss	-1	germline	1
19	53154036	53184690	2	normal	100	somatic	0
20	1553136	1594008	0	loss	-1	germline	1
20	18116514	18280002	3	gain	1.2239	somatic	0
20	19679868	19812702	2	normal	31.5796	somatic	0
20	22091316	22121970	2	normal	64.5431	germline	1
20	24165570	24216660	2	normal	70.5547	somatic	0
20	24758214	24788868	2	normal	100	somatic	0
20	25769796	25790232	1	loss	-1	germline	1
20	25790232	25820886	1	loss	-1	germline	1
20	25820886	25974156	3	gain	0.128471	somatic	0
20	25974156	26055900	1	loss	-1	germline	1
20	26198952	26209170	7	gain	3.28408	germline	1
20	26209170	26219388	4	gain	2.69219	germline	1
20	29427840	29489148	3	gain	0.144907	germline	1
20	29489148	29581110	3	gain	0.26813	germline	1
20	29581110	29652636	9	gain	0.170628	germline	1
20	29805906	29836560	3	gain	5.08152	germline	1
20	32074302	32207136	1	loss	-1	somatic	0
20	33443514	33484386	2	normal	100	somatic	0
20	41515734	41679222	2	normal	100	somatic	0
20	46522554	46532772	6	gain	24.4859	germline	1
20	47125416	47135634	4	gain	2.48148	germline	1
21	0	9410778	7	gain	-1	germline	1
21	9410778	9594702	7	gain	0.645443	germline	1
21	9594702	9645792	7	gain	-1	germline	1
21	9645792	9686664	5	gain	8.73779	germline	1
21	9686664	9707100	20	gain	11.0602	germline	1
21	9707100	9717318	7	gain	5.60022	germline	1
21	9717318	9737754	4	gain	1.14563	germline	1
21	9737754	9768408	2	normal	9.08291	somatic	0
21	9768408	9829716	7	gain	-1	germline	1
21	9829716	9921678	7	gain	4.00426	germline	1
21	9921678	9952332	4	gain	0.956259	germline	1
21	9952332	10207782	7	gain	0.129992	somatic	0
21	10207782	10371270	4	gain	-1	germline	1
21	10371270	10647156	4	gain	1.9033	germline	1
21	10647156	10698246	4	gain	-1	germline	1
21	10698246	10769772	10	gain	0.468383	germline	1
21	10769772	10861734	4	gain	0.76181	germline	1
21	10861734	10912824	4	gain	2.15324	germline	1
21	10912824	11004786	4	gain	4.34626	germline	1
21	11004786	11015004	4	gain	19.639	germline	1
21	11015004	11188710	11	gain	0.412339	germline	1
21	11188710	14346072	11	gain	-1	germline	1
21	14346072	14366508	5	gain	1.29466	germline	1
21	14366508	14448252	3	gain	0.442257	germline	1
21	18423054	18688722	2	normal	100	somatic	0
21	29509584	29713944	2	normal	31.4009	somatic	0
21	36396516	36590658	2	normal	100	somatic	0
21	43498026	43528680	2	normal	60.2338	somatic	0
22	17012970	17350164	1	loss	-1	somatic	0
22	17350164	17391036	3	gain	0.413579	somatic	0
22	17391036	17493216	1	loss	-1	somatic	0
22	17493216	17513652	2	normal	2.97667	somatic	0
22	17513652	18882864	1	loss	-1	somatic	0
22	18882864	18903300	5	gain	20.8057	germline	1
22	18903300	24339276	1	loss	-1	somatic	0
22	24339276	24400584	0	loss	-1	germline	1
22	24400584	25667616	1	loss	-1	somatic	0
22	25667616	25923066	0	loss	-1	somatic	0
22	25923066	26260260	1	loss	-1	somatic	0
22	26260260	26270478	1	loss	-1	somatic	0
22	26270478	29887650	1	loss	-1	somatic	0
22	29887650	30030702	1	loss	-1	somatic	0
22	30030702	30776616	1	loss	-1	somatic	0
22	30776616	30858360	1	loss	-1	somatic	0
22	30858360	32861088	1	loss	-1	somatic	0
22	34986432	35711910	1	loss	-1	somatic	0
22	35711910	35783436	1	loss	-1	somatic	0
22	35783436	36713274	1	loss	-1	somatic	0
22	36754146	37970088	1	loss	-1	somatic	0
22	37970088	38184666	1	loss	-1	somatic	0
22	38184666	40463280	1	loss	-1	somatic	0
22	40463280	40545024	1	loss	-1	somatic	0
22	40545024	41781402	1	loss	-1	somatic	0
22	41781402	41873364	1	loss	-1	somatic	0
22	41873364	43620642	1	loss	-1	somatic	0
X	0	61308	0	loss	-1	germline	1
X	71526	81744	2	gain	45.3355	germline	1
X	81744	163488	0	loss	-1	somatic	0
X	224796	286104	0	loss	-1	somatic	0
X	1032018	1205724	0	loss	-1	somatic	0
X	1481610	1491828	0	loss	-1	somatic	0
X	2697552	2707770	2	gain	93.9158	somatic	0
X	2707770	2728206	2	gain	-1	somatic	0
X	2728206	2738424	2	gain	100	somatic	0
X	2738424	2779296	2	gain	-1	somatic	0
X	2779296	2789514	2	gain	100	somatic	0
X	2789514	2820168	2	gain	-1	somatic	0
X	2820168	2830386	2	gain	93.9158	somatic	0
X	2830386	2840604	2	gain	57.8908	somatic	0
X	2840604	2861040	2	gain	-1	somatic	0
X	2861040	2881476	2	gain	100	somatic	0
X	2881476	2953002	2	gain	-1	somatic	0
X	2963220	2983656	2	gain	-1	somatic	0
X	2983656	3034746	2	gain	64.5425	somatic	0
X	3034746	3044964	1	normal	100	somatic	0
X	3044964	3218670	2	gain	-1	somatic	0
X	3218670	3228888	2	gain	100	somatic	0
X	3228888	3239106	2	gain	-1	somatic	0
X	3239106	3249324	2	gain	46.9584	somatic	0
X	3249324	3269760	2	gain	-1	somatic	0
X	3269760	3443466	2	gain	100	somatic	0
X	3443466	3463902	2	gain	-1	somatic	0
X	3463902	3474120	2	gain	100	somatic	0
X	3474120	3484338	2	gain	66.8747	somatic	0
X	3484338	3504774	2	gain	-1	somatic	0
X	3504774	3514992	2	gain	100	somatic	0
X	3514992	3525210	2	gain	48.9615	somatic	0
X	3525210	3606954	2	gain	-1	somatic	0
X	3606954	3617172	2	gain	100	somatic	0
X	3617172	3678480	2	gain	-1	somatic	0
X	3678480	3688698	2	gain	60.3743	somatic	0
X	3688698	3698916	2	gain	29.1343	somatic	0
X	3698916	3750006	2	gain	-1	somatic	0
X	3750006	3831750	0	loss	-1	germline	1
X	3852186	3893058	2	gain	-1	somatic	0
X	3893058	3903276	2	gain	100	somatic	0
X	3903276	4025892	2	gain	-1	somatic	0
X	4025892	4036110	2	gain	100	somatic	0
X	4036110	4076982	2	gain	-1	somatic	0
X	4076982	4087200	2	gain	100	somatic	0
X	4087200	4199598	2	gain	-1	somatic	0
X	4199598	4209816	2	gain	100	somatic	0
X	4209816	4220034	2	gain	90.3488	somatic	0
X	4220034	4352868	2	gain	-1	somatic	0
X	4352868	4363086	2	gain	100	somatic	0
X	4363086	4465266	2	gain	-1	somatic	0
X	4465266	4475484	2	gain	55.7004	somatic	0
X	4475484	4495920	2	gain	-1	somatic	0
X	4495920	4506138	2	gain	100	somatic	0
X	4506138	4628754	2	gain	-1	somatic	0
X	4628754	4638972	2	gain	93.9141	somatic	0
X	4638972	4659408	2	gain	-1	somatic	0
X	4659408	4669626	2	gain	46.9597	somatic	0
X	4669626	4792242	2	gain	-1	somatic	0
X	4792242	4802460	2	gain	100	somatic	0
X	4802460	4812678	2	gain	-1	somatic	0
X	4812678	4822896	2	gain	100	somatic	0
X	4822896	4904640	2	gain	-1	somatic	0
X	4904640	4914858	2	gain	64.5431	somatic	0
X	4914858	4925076	2	gain	100	somatic	0
X	4925076	4945512	2	gain	-1	somatic	0
X	4945512	4965948	2	gain	100	somatic	0
X	4965948	5017038	2	gain	-1	somatic	0
X	5017038	5027256	2	gain	100	somatic	0
X	5027256	5119218	2	gain	-1	somatic	0
X	5119218	5129436	2	gain	98.7256	somatic	0
X	5129436	5180526	2	gain	-1	somatic	0
X	5180526	5190744	2	gain	100	somatic	0
X	5190744	5211180	2	gain	-1	somatic	0
X	5211180	5221398	2	gain	100	somatic	0
X	5221398	5303142	2	gain	-1	somatic	0
X	5303142	5313360	2	gain	100	somatic	0
X	5313360	5395104	2	gain	-1	somatic	0
X	5395104	5435976	2	gain	100	somatic	0
X	5435976	5476848	2	gain	-1	somatic	0
X	5476848	5487066	2	gain	100	somatic	0
X	5487066	5609682	2	gain	-1	somatic	0
X	5609682	5630118	2	gain	100	somatic	0
X	5630118	5650554	2	gain	-1	somatic	0
X	5650554	5660772	2	gain	26.1861	somatic	0
X	5660772	5681208	2	gain	-1	somatic	0
X	5681208	5691426	2	gain	30.9402	somatic	0
X	5691426	5701644	2	gain	-1	somatic	0
X	5701644	5711862	2	gain	100	somatic	0
X	5711862	5722080	2	gain	-1	somatic	0
X	5722080	5732298	2	gain	31.6212	somatic	0
X	5732298	5742516	2	gain	100	somatic	0
X	5742516	5885568	2	gain	-1	somatic	0
X	5885568	5895786	2	gain	60.3743	somatic	0
X	5895786	5906004	2	gain	-1	somatic	0
X	5906004	5916222	2	gain	60.3743	somatic	0
X	5916222	5936658	2	gain	-1	somatic	0
X	5936658	5967312	2	gain	100	somatic	0
X	5967312	5977530	2	gain	-1	somatic	0
X	5977530	5987748	2	gain	100	somatic	0
X	5987748	5997966	2	gain	93.9141	somatic	0
X	5997966	6008184	2	gain	100	somatic	0
X	6008184	6049056	2	gain	-1	somatic	0
X	6049056	6059274	2	gain	60.3743	somatic	0
X	6059274	6130800	2	gain	-1	somatic	0
X	6130800	6141018	2	gain	100	somatic	0
X	6141018	6171672	2	gain	-1	somatic	0
X	6171672	6202326	2	gain	100	somatic	0
X	6202326	6345378	2	gain	-1	somatic	0
X	6345378	6437340	2	gain	100	somatic	0
X	6437340	6457776	2	gain	-1	somatic	0
X	6457776	6467994	2	gain	100	somatic	0
X	6467994	6478212	2	gain	-1	somatic	0
X	6478212	6488430	2	gain	100	somatic	0
X	6488430	6498648	2	gain	-1	somatic	0
X	6498648	6508866	2	gain	100	somatic	0
X	6508866	6621264	2	gain	-1	somatic	0
X	6621264	6631482	2	gain	65.4997	somatic	0
X	6631482	6692790	2	gain	-1	somatic	0
X	6692790	6703008	2	gain	39.2724	somatic	0
X	6703008	6784752	2	gain	-1	somatic	0
X	6784752	6835842	2	gain	64.5425	somatic	0
X	6835842	6948240	2	gain	-1	somatic	0
X	6948240	6958458	2	gain	93.9158	somatic	0
X	6958458	7019766	2	gain	-1	somatic	0
X	9369906	9390342	2	gain	4.57005	germline	1
X	30807270	30817488	2	gain	100	germline	1
X	30817488	30827706	1	normal	60.9512	somatic	0
X	42741894	42752112	2	gain	100	somatic	0
X	49209888	49220106	2	gain	32.0171	germline	1
X	49220106	49230324	2	gain	100	germline	1
X	49230324	49240542	3	gain	19.3209	germline	1
X	49352940	49363158	1	normal	100	somatic	0
X	52101582	52367250	0	loss	-1	germline	1
X	58559358	58569576	17	gain	16.4849	germline	1
X	58569576	58579794	41	gain	100	germline	1
X	61686066	61706502	19	gain	12.995	germline	1
X	61706502	61716720	23	gain	88.9878	germline	1
X	61716720	61737156	17	gain	11.7568	germline	1
X	61808682	61839336	1	normal	13.5956	germline	1
X	76870014	77002848	0	loss	-1	somatic	0
X	108290364	108300582	3	gain	74.2697	germline	1
X	114962718	114972936	2	gain	7.56032	germline	1
X	114972936	114983154	2	gain	100	germline	1
X	114983154	114993372	3	gain	26.4433	germline	1
X	114993372	115003590	3	gain	100	germline	1
X	115003590	115013808	3	gain	-1	germline	1
X	120112590	120122808	0	loss	-1	somatic	0
X	134846946	134857164	2	gain	100	germline	1
X	134857164	134867382	2	gain	93.9158	germline	1
Y	20436	30654	1	normal	54.3813	somatic	0
Y	7132164	7162818	0	loss	-1	somatic	0
Y	9175764	9369906	2	gain	10.4199	germline	1
Y	9931896	9972768	4	gain	0.305277	germline	1
Y	9972768	9993204	5	gain	0.76208	germline	1
Y	9993204	10044294	3	gain	0.196572	germline	1
Y	13252746	13303836	4	gain	0.538354	germline	1
Y	13303836	13395798	2	gain	0.435647	somatic	0
Y	13395798	13446888	4	gain	0.33616	germline	1
Y	13446888	13487760	20	gain	18.8103	germline	1
Y	13681902	13702338	5	gain	3.02601	germline	1
Y	13702338	13722774	3	gain	13.5539	germline	1
Y	13835172	13845390	13	gain	17.1087	germline	1
Y	14366508	14468688	0	loss	-1	somatic	0
Y	24747996	28784106	0	loss	-1	somatic	0
Y	28784106	28814760	2	gain	1.86771	germline	1
Y	28814760	58825026	0	loss	-1	somatic	0
Y	58825026	58916988	49	gain	2.44278	germline	1
Y	58916988	58968078	49	gain	-1	germline	1
Y	58968078	59029386	11	gain	1.18467	germline	1
Y	59029386	59039604	4	gain	2.0269	germline	1
