# Supplementary material for: Next-Generation Sequence Analysis of Cancer Xenograft Models
Source: PLoS One. 2013 Sep 26;8(9):e74432. doi: 10.1371/journal.pone.0074432 (PMC3784448; doi:10.1371/journal.pone.0074432)
Supplement: Dataset S2 — Detected copy number variations in the xenograft sample derived from the NCI-H209 cell line. (PDF) [file pone.0074432.s010.pdf]

## Sheet: CNVs xenograft
Dataset S2. Detected copy number variations in the xenograft sample derived from the NCI-H209 cell line.
Chromosome	Start	End	Predicted copy no.	Alteration type	Uncertainty of type predicted genotype (%)	Status	Germline CAN/LOH (%)
1	562784	575872	14	gain	56.0601	germline	1
1	837632	850720	1	loss	-1	somatic	0
1	850720	2578336	1	loss	-1	somatic	0
1	2578336	2617600	4	gain	1.4128	germline	1
1	2617600	13912544	1	loss	-1	somatic	0
1	13912544	14043424	1	loss	-1	somatic	0
1	14043424	15116640	1	loss	-1	somatic	0
1	15116640	15142816	1	loss	-1	somatic	0
1	15142816	16883520	1	loss	-1	somatic	0
1	16883520	16975136	4	gain	0.751688	germline	1
1	17210720	17459392	1	loss	-1	somatic	0
1	17459392	17511744	1	loss	-1	somatic	0
1	17511744	18545696	1	loss	-1	somatic	0
1	18545696	18571872	1	loss	-1	somatic	0
1	18571872	22746944	1	loss	-1	somatic	0
1	22746944	22760032	1	loss	-1	somatic	0
1	22760032	24330592	1	loss	-1	somatic	0
1	24330592	24343680	1	loss	-1	somatic	0
1	24343680	27510976	1	loss	-1	somatic	0
1	27510976	27563328	1	loss	-1	somatic	0
1	27563328	28767424	1	loss	-1	somatic	0
1	28767424	28819776	1	loss	-1	somatic	0
1	28819776	29277856	1	loss	-1	somatic	0
1	30259456	31385024	4	gain	6.2379	somatic	0
1	31385024	31764576	3	gain	0.804111	somatic	0
1	31764576	32261920	4	gain	11.436	somatic	0
1	32261920	33466016	4	gain	1.34789	somatic	0
1	33466016	35389952	4	gain	0.732697	somatic	0
1	35389952	36934336	4	gain	2.10728	somatic	0
1	36934336	37902848	5	gain	3.73498	somatic	0
1	37902848	38517984	4	gain	1.70758	somatic	0
1	38517984	39303264	4	gain	4.79524	somatic	0
1	39303264	39722080	3	gain	1.06825	somatic	0
1	39722080	41397344	4	gain	1.41836	somatic	0
1	42601440	42810848	4	gain	4.44107	somatic	0
1	42810848	44512288	3	gain	0.190243	somatic	0
1	44512288	44616992	1	loss	-1	somatic	0
1	44616992	44800224	1	loss	-1	somatic	0
1	44800224	48805152	1	loss	-1	somatic	0
1	48805152	49223968	3	gain	1.67633	somatic	0
1	49223968	49289408	4	gain	-1	somatic	0
1	49289408	49721312	3	gain	15.4834	somatic	0
1	49721312	49799840	3	gain	-1	somatic	0
1	49799840	51501280	3	gain	0.479327	somatic	0
1	51501280	51907008	1	loss	-1	somatic	0
1	51907008	51946272	1	loss	-1	somatic	0
1	51946272	54406816	1	loss	-1	somatic	0
1	54406816	54459168	1	loss	-1	somatic	0
1	54459168	54694752	1	loss	-1	somatic	0
1	72520608	72599136	2	normal	100	somatic	0
1	120527392	120632096	4	gain	1.60796	germline	1
1	121351936	121391200	6	gain	0.946866	germline	1
1	121391200	121469728	2	normal	7.76704	somatic	0
1	143117280	143274336	4	gain	0.197112	germline	1
1	143274336	143287424	20	gain	100	germline	1
1	143287424	143352864	4	gain	-1	germline	1
1	143352864	143418304	4	gain	2.73082	germline	1
1	143418304	143536096	6	gain	0.204749	germline	1
1	143536096	143653888	6	gain	-1	germline	1
1	143653888	143719328	1	loss	-1	germline	1
1	143719328	144203584	3	gain	0.270302	somatic	0
1	144203584	144517696	1	loss	-1	germline	1
1	144517696	144988864	4	gain	1.42052	somatic	0
1	144988864	145119744	7	gain	2.73298	germline	1
1	145119744	145381504	4	gain	0.303586	somatic	0
1	147999104	148025280	6	gain	2.46735	germline	1
1	148836736	148954528	6	gain	0.448449	germline	1
1	149268640	149320992	4	gain	3.54748	germline	1
1	151349632	151506688	2	normal	100	somatic	0
1	158194656	158600384	2	normal	100	germline	1
1	161414304	161440480	9	gain	24.7362	germline	1
1	166060544	166427008	2	normal	47.6241	somatic	0
1	196725728	196817344	0	loss	-1	germline	1
1	196817344	196856608	2	normal	42.5241	somatic	0
1	204159712	204683232	2	normal	46.8162	somatic	0
1	228738976	228778240	4	gain	63.8088	somatic	0
1	236709568	236814272	2	normal	100	somatic	0
2	19108480	19187008	2	normal	90.9407	germline	1
2	19187008	19226272	1	loss	-1	germline	1
2	25076608	25573952	1	loss	-1	somatic	0
2	25573952	25652480	1	loss	-1	somatic	0
2	25652480	25940416	1	loss	-1	somatic	0
2	39277088	39525760	2	normal	100	somatic	0
2	40847648	40965440	2	normal	62.9651	somatic	0
2	46776512	46868128	2	normal	100	germline	1
2	48451776	48726624	2	normal	42.2291	somatic	0
2	71565184	71630624	2	normal	100	germline	1
2	76656416	76878912	2	normal	62.9651	somatic	0
2	87571808	87624160	4	gain	1.60018	germline	1
2	87624160	87741952	1	loss	-1	germline	1
2	89836032	89862208	4	gain	6.47239	germline	1
2	89862208	89888384	6	gain	34.2579	germline	1
2	90372640	90424992	6	gain	0.871541	germline	1
2	90424992	90477344	4	gain	1.51523	germline	1
2	91602912	91616000	8	gain	100	germline	1
2	91616000	91694528	4	gain	0.885097	germline	1
2	91720704	91759968	3	gain	3.80718	germline	1
2	91759968	91825408	10	gain	2.21258	germline	1
2	91825408	91930112	5	gain	0.377658	germline	1
2	91930112	92008640	3	gain	0.286127	germline	1
2	92008640	92231136	3	gain	0.182515	germline	1
2	92231136	92283488	4	gain	0.512291	germline	1
2	92283488	92322752	42	gain	24.6656	germline	1
2	104769440	104926496	2	normal	100	somatic	0
2	107570272	107897472	2	normal	41.2759	germline	1
2	132764672	132777760	5	gain	2.70047	germline	1
2	133000256	133039520	8	gain	3.26637	germline	1
2	133039520	133131136	3	gain	0.148169	germline	1
2	143130368	143248160	2	normal	64.5431	somatic	0
2	162134144	162147232	5	gain	1.17962	germline	1
2	164476896	164699392	2	normal	100	somatic	0
2	194592384	195115904	2	normal	25.5986	somatic	0
2	195482368	195822656	2	normal	100	somatic	0
2	199696704	200508160	2	normal	100	somatic	0
2	210101664	210297984	2	normal	92.2725	somatic	0
2	227102976	227181504	2	normal	72.8155	somatic	0
2	232914048	233071104	2	normal	20.7776	somatic	0
2	238934528	238999968	2	normal	100	somatic	0
3	0	235584	1	loss	-1	somatic	0
3	235584	60087008	1	loss	-1	somatic	0
3	60087008	60139360	1	loss	-1	somatic	0
3	60139360	66722624	1	loss	-1	somatic	0
3	66722624	66788064	1	loss	-1	somatic	0
3	66788064	75413056	1	loss	-1	somatic	0
3	75413056	75426144	1	loss	-1	somatic	0
3	75426144	75674816	1	loss	-1	somatic	0
3	75674816	75687904	3	gain	1.05756	germline	1
3	75687904	75700992	5	gain	0.638778	germline	1
3	75700992	75714080	3	gain	1.42307	germline	1
3	75714080	75753344	5	gain	0.334284	germline	1
3	75753344	75792608	3	gain	0.138077	germline	1
3	75792608	76028192	1	loss	-1	somatic	0
3	76028192	76054368	1	loss	-1	somatic	0
3	76054368	89220896	1	loss	-1	somatic	0
3	89220896	89273248	1	loss	-1	somatic	0
3	89273248	90503520	1	loss	-1	somatic	0
3	112569888	112674592	2	normal	100	somatic	0
3	130932352	131416608	1	loss	-1	somatic	0
3	162513696	162631488	1	loss	-1	germline	1
3	174018048	174109664	2	normal	31.5796	germline	1
3	174829504	174842592	1	loss	36.8474	somatic	0
3	174842592	174881856	1	loss	-1	somatic	0
3	174881856	176020512	1	loss	-1	somatic	0
3	176020512	176059776	1	loss	-1	somatic	0
3	176059776	176072864	1	loss	-1	somatic	0
3	196621024	196634112	14	gain	100	germline	1
3	197825120	197956000	3	gain	0.968874	somatic	0
3	197956000	198022430	3	gain	-1	somatic	0
4	13088	26176	4	gain	9.99603	germline	1
4	26176	65440	8	gain	4.86544	germline	1
4	3573024	3638464	4	gain	2.20468	germline	1
4	9096160	9213952	1	loss	-1	germline	1
4	9213952	9371008	5	gain	54.5217	germline	1
4	10208640	10234816	0	loss	-1	germline	1
4	31869280	31960896	2	normal	56.0629	somatic	0
4	44603904	44918016	2	normal	42.8938	somatic	0
4	49093088	49171616	13	gain	1.75715	germline	1
4	49171616	49250144	4	gain	0.734386	germline	1
4	49250144	49328672	12	gain	0.493343	germline	1
4	49328672	49498816	3	gain	-1	germline	1
4	49498816	49511904	3	gain	1.47601	germline	1
4	49511904	49524992	23	gain	100	germline	1
4	49524992	49551168	5	gain	1.77185	germline	1
4	49551168	49629696	3	gain	0.239293	germline	1
4	60950816	61330368	2	normal	100	somatic	0
4	62573728	62691520	2	normal	56.0629	somatic	0
4	63843264	64091936	2	normal	100	somatic	0
4	68253920	68267008	8	gain	79.8214	germline	1
4	69379488	69497280	0	loss	-1	germline	1
4	71682976	72049440	2	normal	89.5204	somatic	0
4	74954976	75151296	2	normal	100	somatic	0
4	95241376	95346080	2	normal	100	somatic	0
4	112151072	113407520	4	gain	0.397931	somatic	0
4	113407520	113813248	4	gain	100	somatic	0
4	113813248	114362944	4	gain	1.80153	somatic	0
4	114362944	116535552	3	gain	0.112204	somatic	0
4	116535552	124126592	3	gain	0.0344319	somatic	0
4	124126592	124309824	3	gain	13.5669	somatic	0
4	131586752	132659968	3	gain	0.209859	somatic	0
4	132659968	132673056	6	gain	10.8472	somatic	0
4	132673056	133877152	3	gain	0.223612	somatic	0
4	133877152	134008032	4	gain	59.3075	somatic	0
4	147972928	148208512	2	normal	63.756	somatic	0
4	151349632	152134912	2	normal	38.0951	somatic	0
4	160249472	160393440	2	normal	100	germline	1
4	172473664	172565280	2	normal	39.2724	somatic	0
4	173389824	173847904	2	normal	100	somatic	0
4	176282272	176439328	2	normal	100	somatic	0
4	190469664	190679072	5	gain	0.674555	germline	1
4	190796864	190823040	5	gain	0.406739	germline	1
4	190823040	191045536	3	gain	0.0958875	somatic	0
4	191045536	191154276	3	gain	-1	germline	1
5	0	13088	3	gain	-1	somatic	0
5	13088	798368	3	gain	0.20756	somatic	0
5	824544	16726464	3	gain	0.017572	somatic	0
5	16726464	17511744	3	gain	0.421184	somatic	0
5	17511744	17603360	3	gain	-1	somatic	0
5	17603360	21477408	3	gain	0.0728516	somatic	0
5	21477408	21503584	10	gain	58.5671	germline	1
5	21503584	21529760	4	gain	2.86537	germline	1
5	21529760	21569024	5	gain	0.224205	germline	1
5	21569024	31398112	3	gain	0.0332143	somatic	0
5	31398112	32549856	4	gain	0.239523	somatic	0
5	32549856	34172768	4	gain	0.406204	somatic	0
5	34172768	34198944	19	gain	36.5742	germline	1
5	34198944	34342912	3	gain	1.48136	somatic	0
5	34342912	36162144	4	gain	0.358114	somatic	0
5	36162144	36410816	5	gain	1.41465	somatic	0
5	36410816	37012864	3	gain	0.737914	somatic	0
5	37012864	37614912	3	gain	0.751982	somatic	0
5	37614912	38936800	3	gain	0.307478	somatic	0
5	38936800	45925792	3	gain	0.0538762	somatic	0
5	45925792	46396960	3	gain	0.436606	somatic	0
5	46396960	49407200	3	gain	-1	somatic	0
5	49407200	49446464	11	gain	5.1953	germline	1
5	49446464	68712000	1	loss	-1	somatic	0
5	68712000	68895232	1	loss	-1	somatic	0
5	68895232	70505056	0	loss	-1	somatic	0
5	70505056	70531232	2	normal	21.7342	somatic	0
5	70531232	71473568	1	loss	-1	somatic	0
5	71473568	71525920	1	loss	-1	somatic	0
5	71525920	73685440	1	loss	-1	somatic	0
5	73685440	73999552	1	loss	-1	somatic	0
5	73999552	89116192	1	loss	-1	somatic	0
5	89116192	94770208	0	loss	-1	somatic	0
5	94770208	126940512	1	loss	-1	somatic	0
5	126940512	126979776	1	loss	-1	somatic	0
5	126979776	127058304	1	loss	-1	somatic	0
5	127058304	127071392	3	gain	-1	somatic	0
5	127071392	127398592	5	gain	7.42265	somatic	0
5	127398592	132568352	2	normal	10.6282	somatic	0
5	133248928	134243616	2	normal	12.0442	somatic	0
5	137122976	142017888	2	normal	17.8458	somatic	0
5	142017888	156166016	2	normal	5.74402	somatic	0
5	156166016	168089184	2	normal	4.59686	somatic	0
5	180863072	180902336	3	gain	7.02608	somatic	0
6	143968	301024	3	gain	1.2662	somatic	0
6	301024	379552	5	gain	1.27259	germline	1
6	379552	3324352	3	gain	0.076071	somatic	0
6	3324352	3586112	4	gain	0.714462	somatic	0
6	3586112	6740320	3	gain	0.0738172	somatic	0
6	6740320	8886752	3	gain	0.126801	somatic	0
6	8886752	9488800	3	gain	11.7274	somatic	0
6	9488800	13218880	3	gain	0.0925911	somatic	0
6	13218880	13258144	3	gain	100	somatic	0
6	13258144	13284320	3	gain	-1	somatic	0
6	13284320	20783744	3	gain	0.0448144	somatic	0
6	20783744	20966976	3	gain	40.0087	somatic	0
6	20966976	20980064	3	gain	-1	somatic	0
6	20980064	22262688	3	gain	0.288876	somatic	0
6	22315040	23074144	2	normal	100	somatic	0
6	24055744	25207488	3	gain	0.382421	somatic	0
6	25207488	25220576	3	gain	100	somatic	0
6	25220576	26673344	3	gain	0.144154	somatic	0
6	26673344	26712608	5	gain	7.15095	somatic	0
6	26712608	32445152	3	gain	0.0236195	somatic	0
6	32445152	32641472	1	loss	-1	germline	1
6	32641472	33623072	3	gain	0.0795407	somatic	0
6	33623072	34107328	3	gain	0.445677	somatic	0
6	34107328	37405504	3	gain	0.103924	somatic	0
6	37405504	37889760	3	gain	0.734999	somatic	0
6	37889760	37915936	3	gain	-1	somatic	0
6	37915936	37942112	3	gain	36.5068	somatic	0
6	37942112	39735168	3	gain	0.20731	somatic	0
6	39735168	39774432	3	gain	-1	somatic	0
6	39774432	41737632	3	gain	0.161468	somatic	0
6	41737632	43635392	3	gain	0.214111	somatic	0
6	43635392	46318432	3	gain	0.11913	somatic	0
6	46318432	46396960	3	gain	-1	somatic	0
6	46396960	46776512	3	gain	1.02658	somatic	0
6	46776512	47142976	3	gain	12.4409	somatic	0
6	47142976	47156064	3	gain	-1	somatic	0
6	47156064	51514368	3	gain	0.0649355	somatic	0
6	51514368	51815392	3	gain	13.4739	somatic	0
6	51815392	57207648	3	gain	0.0680288	somatic	0
6	57207648	57325440	5	gain	0.0879025	germline	1
6	57325440	57600288	7	gain	0.368038	somatic	0
6	57600288	58765120	3	gain	0.140301	somatic	0
6	58765120	58778208	251	gain	100	germline	1
6	58778208	61880064	3	gain	-1	somatic	0
6	61880064	62469024	3	gain	0.291651	somatic	0
6	62469024	62743872	3	gain	17.8003	somatic	0
6	62743872	64497664	3	gain	0.175341	somatic	0
6	64497664	64536928	3	gain	-1	somatic	0
6	64536928	64929568	3	gain	69.7848	somatic	0
6	64929568	64968832	3	gain	-1	somatic	0
6	64968832	66316896	3	gain	0.211776	somatic	0
6	66316896	66329984	3	gain	-1	somatic	0
6	66329984	66434688	3	gain	100	somatic	0
6	66434688	66487040	3	gain	-1	somatic	0
6	66487040	71368864	3	gain	0.0612825	somatic	0
6	71368864	71421216	3	gain	100	somatic	0
6	71421216	73907936	3	gain	0.137942	somatic	0
6	74392192	74968064	3	gain	4.02016	somatic	0
6	74968064	75072768	3	gain	100	somatic	0
6	75072768	75085856	3	gain	-1	somatic	0
6	75085856	78593440	3	gain	0.0840997	somatic	0
6	78593440	82297344	3	gain	0.0594001	somatic	0
6	82297344	82336608	3	gain	100	somatic	0
6	82336608	83017184	3	gain	0.528864	somatic	0
6	83017184	83082624	3	gain	92.8121	somatic	0
6	83082624	84011872	3	gain	0.430092	somatic	0
6	84011872	84208192	3	gain	100	somatic	0
6	84208192	90621312	3	gain	0.041385	somatic	0
6	90621312	91812320	3	gain	0.19683	somatic	0
6	101144064	101235680	2	normal	60.2338	somatic	0
6	112831648	112870912	1	loss	-1	somatic	0
6	112870912	112884000	1	loss	-1	somatic	0
6	112884000	114271328	1	loss	-1	somatic	0
6	125723328	125867296	2	normal	100	somatic	0
6	130487360	130513536	2	normal	56.0629	germline	1
6	153653120	153692384	2	normal	100	somatic	0
6	161034752	161074016	5	gain	4.51857	germline	1
7	13088	26176	4	gain	19.7047	somatic	0
7	55767968	56435456	2	normal	15.5251	somatic	0
7	56435456	56448544	13	gain	83.3263	germline	1
7	56527072	56762656	2	normal	10.3768	somatic	0
7	56762656	56815008	1	loss	-1	somatic	0
7	56815008	56998240	2	normal	75.8745	somatic	0
7	56998240	57181472	1	loss	-1	somatic	0
7	61068608	61107872	4	gain	3.6231	germline	1
7	61107872	61238752	1	loss	-1	somatic	0
7	61238752	61251840	4	gain	8.52255	germline	1
7	61251840	61526688	1	loss	-1	germline	1
7	61526688	61565952	2	normal	9.17364	somatic	0
7	61565952	61657568	1	loss	-1	germline	1
7	61657568	61814624	3	gain	0.166389	somatic	0
7	61814624	61827712	8	gain	3.74629	germline	1
7	61827712	61906240	3	gain	0.326337	germline	1
7	61906240	61971680	1	loss	-1	somatic	0
7	61971680	61984768	5	gain	3.89971	germline	1
7	61984768	62822400	1	loss	-1	somatic	0
7	62822400	62887840	1	loss	-1	somatic	0
7	62887840	63306656	1	loss	-1	somatic	0
7	63306656	63450624	1	loss	-1	somatic	0
7	63450624	64366784	1	loss	-1	somatic	0
7	64366784	64445312	1	loss	-1	somatic	0
7	64445312	65845728	1	loss	-1	somatic	0
7	65845728	66055136	1	loss	-1	somatic	0
7	66055136	73934112	1	loss	-1	somatic	0
7	73934112	74051904	1	loss	-1	somatic	0
7	74051904	75138208	1	loss	-1	somatic	0
7	75138208	75269088	1	loss	-1	somatic	0
7	75269088	75635552	1	loss	-1	somatic	0
7	75635552	75648640	1	loss	-1	somatic	0
7	75648640	77624928	1	loss	-1	somatic	0
7	77624928	77651104	1	loss	-1	somatic	0
7	77651104	86851968	1	loss	-1	somatic	0
7	86851968	86865056	1	loss	-1	somatic	0
7	86865056	102125664	1	loss	-1	somatic	0
7	102125664	102321984	1	loss	9.09431	somatic	0
7	102321984	107243072	1	loss	-1	somatic	0
7	107243072	107282336	1	loss	-1	somatic	0
7	107282336	107832032	1	loss	-1	somatic	0
7	109978464	110214048	2	normal	20.7535	somatic	0
7	113459872	114546176	2	normal	100	somatic	0
7	120435776	121103264	1	loss	-1	somatic	0
7	121103264	121378112	1	loss	-1	somatic	0
7	121378112	121404288	1	loss	-1	somatic	0
7	122385888	122922496	3	gain	0.367399	somatic	0
7	143915648	144072704	3	gain	1.41024	germline	1
7	151925504	151990944	3	gain	0.341485	germline	1
7	152095648	152108736	5	gain	0.754405	germline	1
7	152108736	152121824	3	gain	0.944367	germline	1
8	157056	2198784	3	gain	0.0798877	somatic	0
8	2198784	2290400	5	gain	0.501048	germline	1
8	2290400	6400032	3	gain	0.0429494	somatic	0
8	6400032	6988992	3	gain	0.244919	somatic	0
8	7198400	7316192	3	gain	0.693832	somatic	0
8	7525600	7617216	1	loss	-1	germline	1
8	7800448	7865888	1	loss	-1	germline	1
8	7931328	7983680	1	loss	-1	germline	1
8	7983680	8062208	3	gain	0.681846	somatic	0
8	8062208	8088384	1	loss	-1	somatic	0
8	8088384	9789824	3	gain	0.134437	somatic	0
8	9789824	11896992	3	gain	0.0868596	somatic	0
8	11896992	11975520	1	loss	-1	germline	1
8	11975520	12080224	3	gain	0.735553	somatic	0
8	12237280	12394336	3	gain	0.543243	somatic	0
8	12394336	12459776	7	gain	1.35806	germline	1
8	12459776	18899072	3	gain	0.0392959	somatic	0
8	18899072	19056128	3	gain	1.21673	somatic	0
8	43648480	43792448	1	loss	-1	somatic	0
8	43792448	43805536	5	gain	20.5534	germline	1
8	43805536	43818624	1	loss	-1	somatic	0
8	46868128	49106176	2	normal	16.7362	somatic	0
8	52744640	52796992	2	normal	100	somatic	0
8	58110720	58136896	4	gain	3.47925	germline	1
8	61696832	61736096	3	gain	5.27331	somatic	0
8	68332448	68397888	2	normal	13.7756	somatic	0
8	68397888	68489504	4	gain	4.10508	somatic	0
8	68489504	70766816	3	gain	0.122236	somatic	0
8	71028576	71997088	3	gain	0.28543	somatic	0
8	71997088	74496896	3	gain	0.127147	somatic	0
8	74496896	75465408	3	gain	0.322367	somatic	0
8	75465408	75635552	3	gain	54.0112	somatic	0
8	75635552	75648640	3	gain	-1	somatic	0
8	75648640	76852736	3	gain	0.44143	somatic	0
8	76852736	77193024	3	gain	29.7611	somatic	0
8	77193024	79980768	3	gain	0.118502	somatic	0
8	79980768	80124736	3	gain	-1	somatic	0
8	80124736	86446240	3	gain	0.0510714	somatic	0
8	86511680	86550944	3	gain	-1	germline	1
8	86550944	86838880	18	gain	1.73583	germline	1
8	86838880	86851968	5	gain	19.2348	germline	1
8	86851968	88579584	3	gain	0.265295	somatic	0
8	88579584	89980000	3	gain	0.188272	somatic	0
8	89980000	90032352	3	gain	79.561	somatic	0
8	90032352	90071616	3	gain	-1	somatic	0
8	90071616	95476960	3	gain	0.0771954	somatic	0
8	95476960	96157536	3	gain	0.367755	somatic	0
8	96157536	97662656	3	gain	0.181154	somatic	0
8	97662656	97754272	3	gain	-1	somatic	0
8	97754272	97832800	3	gain	100	somatic	0
8	97832800	98591904	3	gain	0.89299	somatic	0
8	98892928	101733024	3	gain	0.193825	somatic	0
8	101798464	105148992	3	gain	0.105279	somatic	0
8	105148992	105175168	3	gain	-1	somatic	0
8	105175168	105201344	3	gain	35.3506	somatic	0
8	105201344	110973152	3	gain	0.0656332	somatic	0
8	110973152	120619008	3	gain	0.04507	somatic	0
8	120619008	121247232	2	normal	2.43853	somatic	0
8	121247232	121404288	3	gain	1.25568	somatic	0
8	121404288	121456640	3	gain	-1	somatic	0
8	121456640	133916416	3	gain	0.0259201	somatic	0
8	133916416	136010496	3	gain	0.119266	somatic	0
8	136010496	136468576	3	gain	1.70355	somatic	0
8	136468576	136599456	3	gain	18.582	somatic	0
8	136599456	136638720	3	gain	-1	somatic	0
8	136638720	139531168	3	gain	0.0931733	somatic	0
8	139531168	139819104	3	gain	0.776875	somatic	0
8	139819104	139858368	3	gain	100	somatic	0
8	139858368	141389664	3	gain	0.149653	somatic	0
8	141389664	142083328	3	gain	0.437049	somatic	0
8	142083328	144033440	3	gain	0.104384	somatic	0
8	144033440	145289888	3	gain	0.248448	somatic	0
8	145289888	145499296	1	loss	-1	germline	1
8	145499296	146297664	3	gain	0.401753	somatic	0
8	146297664	146364022	3	gain	-1	somatic	0
9	4593888	4659328	2	normal	100	somatic	0
9	5928864	5994304	2	normal	100	somatic	0
9	11137888	11190240	2	normal	64.5431	somatic	0
9	20417280	20482720	2	normal	30.1169	somatic	0
9	24121184	24238976	2	normal	45.3144	somatic	0
9	31319584	31398112	2	normal	46.7026	somatic	0
9	38766656	38897536	1	loss	-1	somatic	0
9	39185472	40402656	1	loss	-1	somatic	0
9	40847648	41829248	1	loss	-1	germline	1
9	44473024	44852576	1	loss	-1	germline	1
9	44996544	45245216	1	loss	-1	germline	1
9	45349920	45376096	4	gain	0.834899	germline	1
9	45755648	46619456	1	loss	-1	germline	1
9	46907392	47169152	1	loss	-1	germline	1
9	47169152	47221504	3	gain	1.24865	germline	1
9	47221504	66460864	1	loss	-1	germline	1
9	66460864	66539392	6	gain	0.272753	germline	1
9	66539392	66788064	2	normal	18.7734	somatic	0
9	66788064	66827328	5	gain	2.97388	germline	1
9	66827328	66840416	14	gain	100	germline	1
9	66840416	66853504	4	gain	9.76285	germline	1
9	66853504	66918944	2	normal	-1	somatic	0
9	66918944	67259232	2	normal	14.6021	germline	1
9	67259232	67363936	3	gain	0.331705	germline	1
9	67363936	67782752	1	loss	-1	germline	1
9	68345536	68384800	4	gain	1.16549	germline	1
9	68384800	68437152	11	gain	1.55907	germline	1
9	68437152	68502592	4	gain	0.472669	germline	1
9	68502592	68738176	3	gain	0.163307	germline	1
9	69798304	69850656	4	gain	1.37181	germline	1
9	75583200	75622464	2	normal	78.5937	somatic	0
9	80347232	80962368	2	normal	18.1676	somatic	0
9	87257696	87597984	2	normal	31.1919	somatic	0
9	89312512	89364864	2	normal	100	somatic	0
9	90830720	90869984	2	normal	100	somatic	0
9	90869984	91184096	1	loss	100	somatic	0
9	97832800	98029120	2	normal	100	germline	1
9	120540480	120605920	2	normal	100	germline	1
9	129675904	129715168	2	normal	100	somatic	0
9	131220288	131599840	2	normal	53.4886	somatic	0
10	65440	104704	3	gain	3.07187	somatic	0
10	17773504	18218496	1	loss	-1	germline	1
10	27419360	27524064	1	loss	-1	somatic	0
10	28086848	28113024	2	normal	100	somatic	0
10	35573184	35586272	1	loss	-1	somatic	0
10	35586272	35782592	2	normal	100	somatic	0
10	38805920	38819008	4	gain	3.75973	germline	1
10	42365856	42418208	111	gain	98.6225	germline	1
10	42522912	42536000	57	gain	87.624	germline	1
10	42601440	42640704	3	gain	0.764484	germline	1
10	42640704	42666880	5	gain	1.32022	germline	1
10	46279168	46946656	1	loss	-1	germline	1
10	46946656	47156064	4	gain	0.487671	germline	1
10	47156064	47326208	1	loss	-1	germline	1
10	47705760	48307808	1	loss	-1	germline	1
10	48661184	49367936	1	loss	-1	germline	1
10	49538080	49682048	2	normal	61.6579	germline	1
10	50218656	50362624	2	normal	21.1694	somatic	0
10	51056288	51998624	1	loss	-1	somatic	0
10	56631776	56815008	2	normal	37.3131	somatic	0
10	63424448	63542240	2	normal	100	somatic	0
10	63934880	64065760	2	normal	64.5431	somatic	0
10	68960672	69484192	2	normal	100	somatic	0
10	76145984	76237600	2	normal	100	germline	1
10	81381184	81512064	1	loss	-1	somatic	0
10	86577120	86721088	2	normal	55.2193	somatic	0
10	90189408	90451168	2	normal	59.0888	somatic	0
10	99678208	100070848	2	normal	100	somatic	0
10	108551872	108604224	2	normal	100	somatic	0
10	111457408	111483584	2	normal	100	germline	1
10	119323296	119414912	2	normal	37.3753	somatic	0
10	126456256	126495520	2	normal	100	somatic	0
10	127568736	127594912	7	gain	0.580788	germline	1
10	135460800	135500064	3	gain	0.615647	somatic	0
10	135500064	135526240	5	gain	20.8768	somatic	0
11	65440	183232	2	normal	56.1293	somatic	0
11	183232	222496	3	gain	2.54843	germline	1
11	222496	955424	3	gain	1.21684	somatic	0
11	955424	3272000	3	gain	0.0978846	somatic	0
11	3272000	3350528	1	loss	20.135	germline	1
11	3350528	4345216	3	gain	0.156761	somatic	0
11	4345216	6975904	3	gain	0.0849099	somatic	0
11	6975904	6988992	3	gain	-1	somatic	0
11	6988992	7106784	3	gain	100	somatic	0
11	7106784	8834400	3	gain	0.208049	somatic	0
11	8834400	9043808	3	gain	100	somatic	0
11	9043808	9069984	3	gain	-1	somatic	0
11	9069984	9213952	3	gain	7.19201	somatic	0
11	9724384	10418048	3	gain	0.864307	somatic	0
11	10418048	14292096	3	gain	0.0620881	somatic	0
11	14292096	14580032	3	gain	1.6498	somatic	0
11	14580032	17027488	3	gain	0.121878	somatic	0
11	17027488	17393952	3	gain	1.26892	somatic	0
11	17393952	17917472	3	gain	0.407532	somatic	0
11	17917472	18362464	3	gain	0.426654	somatic	0
11	18938336	18964512	4	gain	26.9562	germline	1
11	41214112	41240288	2	normal	100	somatic	0
11	43360544	43452160	2	normal	100	somatic	0
11	51095552	51187168	1	loss	-1	germline	1
11	51566720	51592896	19	gain	43.324	germline	1
11	54694752	54799456	1	loss	-1	germline	1
11	55362240	55453856	1	loss	-1	germline	1
11	84456864	84561568	2	normal	100	somatic	0
11	92074080	92636864	3	gain	0.533866	somatic	0
11	93958752	93971840	5	gain	20.8381	germline	1
11	105148992	105410752	2	normal	100	somatic	0
11	115069696	115449248	2	normal	31.6309	somatic	0
11	121116352	121168704	2	normal	100	somatic	0
11	124021888	124192032	2	normal	100	somatic	0
11	129086944	129178560	2	normal	100	somatic	0
12	0	65440	3	gain	-1	germline	1
12	65440	157056	3	gain	0.963734	germline	1
12	157056	170144	5	gain	1.11664	germline	1
12	889984	903072	1	loss	-1	somatic	0
12	903072	1151744	1	loss	-1	somatic	0
12	1151744	1164832	1	loss	-1	somatic	0
12	1164832	1321888	1	loss	-1	somatic	0
12	7800448	8180000	1	loss	4.00859	somatic	0
12	8559552	8598816	0	loss	-1	germline	1
12	9632768	9724384	0	loss	-1	germline	1
12	9724384	9737472	1	loss	-1	germline	1
12	11216416	11255680	1	loss	-1	germline	1
12	14697824	14894144	2	normal	17.2041	somatic	0
12	18048352	18126880	2	normal	100	somatic	0
12	19893760	19919936	2	normal	100	somatic	0
12	20836096	21503584	2	normal	81.5192	somatic	0
12	22144896	22288864	2	normal	100	germline	1
12	23309728	23558400	2	normal	34.2341	somatic	0
12	26267616	26359232	2	normal	60.2338	somatic	0
12	29107712	29264768	2	normal	39.2724	somatic	0
12	31280320	31411200	3	gain	1.01488	germline	1
12	81485888	81708384	2	normal	55.2193	germline	1
12	88160768	89090016	2	normal	12.5134	somatic	0
12	106719552	106902784	2	normal	60.2338	germline	1
12	124087328	124244384	2	normal	100	somatic	0
12	133052608	133811712	2	normal	100	somatic	0
13	19344064	19357152	0	loss	-1	germline	1
13	20469632	20613600	2	normal	62.9651	somatic	0
13	22118720	23178848	2	normal	7.28874	somatic	0
13	23178848	23479872	2	normal	100	somatic	0
13	31175616	32994848	2	normal	8.91364	somatic	0
13	33204256	38072992	2	normal	4.08178	somatic	0
13	38072992	38086080	0	loss	-1	somatic	0
13	38086080	41174848	2	normal	33.7972	somatic	0
13	41174848	41920864	2	normal	30.3091	somatic	0
13	41920864	45114336	2	normal	32.3665	somatic	0
13	45114336	46109024	2	normal	51.9373	somatic	0
13	46109024	46554016	2	normal	36.1847	somatic	0
13	49943808	50663648	2	normal	23.1203	somatic	0
13	50663648	52548320	2	normal	8.53301	somatic	0
13	57704992	57718080	3	gain	27.3205	germline	1
13	57718080	57744256	5	gain	-1	germline	1
13	57744256	59929952	2	normal	14.5485	somatic	0
13	63620768	63646944	3	gain	0.19892	germline	1
13	73476032	73816320	2	normal	40.2309	somatic	0
13	73816320	80779136	2	normal	15.2757	somatic	0
13	80923104	92309664	2	normal	44.4335	somatic	0
13	92309664	95202112	2	normal	100	somatic	0
13	95202112	95935040	2	normal	9.72013	somatic	0
13	96079008	98565728	2	normal	23.8085	somatic	0
13	100188640	101183328	2	normal	28.791	somatic	0
13	101183328	103918720	2	normal	16.2821	somatic	0
13	106968224	109860672	2	normal	24.2917	somatic	0
13	112936352	112975616	3	gain	6.84562	germline	1
13	114088096	115108960	2	normal	30.036	somatic	0
14	0	19003776	4	gain	-1	germline	1
14	19003776	19056128	4	gain	2.08635	germline	1
14	19056128	19134656	3	gain	1.01275	germline	1
14	25809536	25835712	2	normal	100	somatic	0
14	38007552	38033728	2	normal	100	germline	1
14	39106944	39277088	2	normal	34.0462	somatic	0
14	39826784	39866048	2	normal	100	somatic	0
14	47103712	47156064	2	normal	100	germline	1
14	52325824	52443616	2	normal	100	somatic	0
14	55336064	55414592	2	normal	100	somatic	0
14	60440384	60479648	2	normal	64.5431	somatic	0
14	70348000	70714464	2	normal	2.23694	somatic	0
14	72455168	73279712	2	normal	1.26952	somatic	0
14	73999552	74025728	0	loss	-1	germline	1
14	78475648	79260928	3	gain	2.25403	somatic	0
14	85909632	85935808	2	normal	56.0629	somatic	0
14	89050752	89744416	3	gain	2.38115	somatic	0
14	90281024	90346464	2	normal	100	somatic	0
14	90883072	91079392	3	gain	1.20254	somatic	0
14	91576736	91602912	2	normal	100	somatic	0
14	100829952	100882304	2	normal	60.2338	somatic	0
14	100882304	100908480	3	gain	-1	somatic	0
14	106523232	106575584	1	loss	-1	germline	1
14	106798080	106824256	4	gain	2.08055	germline	1
14	106876608	106915872	1	loss	-1	germline	1
14	107151456	107177632	5	gain	0.510855	germline	1
15	20103168	20155520	3	gain	0.487827	germline	1
15	20391104	20469632	4	gain	18.607	germline	1
15	20469632	20521984	5	gain	1.9994	germline	1
15	20521984	20548160	3	gain	1.45015	germline	1
15	20548160	20626688	5	gain	1.77276	germline	1
15	20823008	20849184	3	gain	7.46767	germline	1
15	20849184	20875360	5	gain	0.988141	germline	1
15	21883136	21896224	3	gain	8.01642	germline	1
15	21896224	21935488	5	gain	1.03259	germline	1
15	21935488	22171072	3	gain	0.334176	germline	1
15	22301952	22694592	3	gain	0.327456	somatic	0
15	24670880	24723232	1	loss	-1	germline	1
15	26961280	27026720	2	normal	16.1534	somatic	0
15	30390336	30900768	1	loss	-1	somatic	0
15	32445152	32863968	1	loss	7.62377	somatic	0
15	37601824	37785056	2	normal	100	somatic	0
15	48268544	48504128	2	normal	56.0629	somatic	0
15	55898848	56029728	2	normal	100	somatic	0
15	69026112	69065376	2	normal	100	somatic	0
15	73318976	73567648	2	normal	25.7494	somatic	0
15	74352928	74392192	3	gain	4.6659	germline	1
15	75543936	75583200	3	gain	4.46332	germline	1
15	82585280	83213504	1	loss	-1	somatic	0
15	84849504	84875680	4	gain	5.56971	germline	1
15	88749728	88775904	2	normal	100	somatic	0
15	102479040	102518304	3	gain	1.50826	germline	1
16	2159520	3651552	1	loss	-1	somatic	0
16	3651552	3887136	0	loss	-1	somatic	0
16	14985760	15129728	3	gain	1.81027	somatic	0
16	21516672	21595200	3	gain	5.13371	germline	1
16	22511360	22629152	3	gain	3.46873	germline	1
16	22629152	22707680	4	gain	37.8961	germline	1
16	25325280	25364544	2	normal	60.2338	somatic	0
16	29762112	29788288	1	loss	100	somatic	0
16	30194016	30298720	3	gain	6.70735	somatic	0
16	30730624	30992384	2	normal	42.0292	somatic	0
16	32091776	32170304	3	gain	0.383545	germline	1
16	32327360	32628384	3	gain	0.0856081	somatic	0
16	32628384	32811616	2	normal	18.4556	germline	1
16	32811616	32850880	4	gain	0.598795	germline	1
16	32850880	33034112	2	normal	8.7554	germline	1
16	33034112	33099552	3	gain	0.575814	germline	1
16	33322048	33413664	4	gain	0.898908	germline	1
16	33413664	33518368	3	gain	0.270934	germline	1
16	33518368	33544544	5	gain	0.413921	germline	1
16	33544544	33636160	3	gain	0.518646	germline	1
16	33911008	33989536	7	gain	0.225238	germline	1
16	33989536	34198944	3	gain	0.2904	germline	1
16	46383872	46436224	173	gain	8.1574	germline	1
16	46436224	46501664	3	gain	0.392549	germline	1
16	67952896	68280096	1	loss	-1	somatic	0
16	68280096	68332448	1	loss	-1	somatic	0
16	68332448	69903008	1	loss	-1	somatic	0
16	69903008	69942272	1	loss	-1	somatic	0
16	69942272	70243296	1	loss	-1	somatic	0
16	70243296	70308736	1	loss	-1	somatic	0
16	70308736	70806080	1	loss	-1	somatic	0
16	70806080	70845344	1	loss	-1	somatic	0
16	70845344	70871520	1	loss	-1	somatic	0
16	70871520	71198720	3	gain	0.140294	germline	1
16	71198720	71211808	1	loss	-1	somatic	0
16	71211808	71303424	1	loss	-1	somatic	0
16	71303424	72141056	1	loss	-1	somatic	0
16	72141056	72180320	1	loss	-1	somatic	0
16	72180320	72298112	1	loss	-1	somatic	0
16	72298112	72324288	1	loss	-1	somatic	0
16	72324288	72428992	1	loss	-1	somatic	0
16	79012256	79038432	2	normal	100	somatic	0
16	90176320	90189408	4	gain	4.27259	germline	1
16	90189408	90294112	2	normal	2.3608	germline	1
17	21189472	21228736	4	gain	0.743616	germline	1
17	21228736	21254912	5	gain	0.477431	germline	1
17	21307264	21346528	5	gain	0.212524	germline	1
17	21542848	21555936	6	gain	0.809883	germline	1
17	21896224	21909312	12	gain	100	germline	1
17	25299104	25338368	3	gain	0.292159	germline	1
17	25338368	27497888	2	normal	9.58678	somatic	0
17	27497888	30809152	2	normal	15.6909	somatic	0
17	30809152	33230432	2	normal	100	somatic	0
17	33230432	34578496	2	normal	22.1816	somatic	0
17	34578496	34591584	4	gain	6.17756	germline	1
17	34591584	34670112	1	loss	-1	somatic	0
17	34735552	34761728	4	gain	15.2262	germline	1
17	36279936	36410816	5	gain	4.40553	somatic	0
17	41397344	41410432	5	gain	2.44672	germline	1
17	49367936	56500896	2	normal	2.92612	somatic	0
17	60427296	61225664	3	gain	4.03854	somatic	0
17	61225664	80046208	2	normal	4.1234	somatic	0
17	81184864	81195210	1	loss	-1	germline	1
18	0	13088	6	gain	-1	somatic	0
18	13088	104704	6	gain	17.6575	somatic	0
18	104704	117792	63	gain	9.25078	germline	1
18	117792	1138656	6	gain	1.21076	somatic	0
18	1138656	2473632	3	gain	0.164247	somatic	0
18	2473632	3808608	3	gain	0.177919	somatic	0
18	8193088	8232352	2	normal	100	somatic	0
18	15155904	15182080	4	gain	2.02738	germline	1
18	18519520	18532608	10	gain	37.1148	germline	1
18	22275776	22341216	2	normal	100	germline	1
18	38832096	39250912	2	normal	70.4113	somatic	0
18	40010016	40167072	2	normal	84.2039	somatic	0
18	43674656	43844800	2	normal	43.2738	somatic	0
18	44538464	44564640	6	gain	29.4274	germline	1
18	45991232	46122112	2	normal	100	somatic	0
18	51213344	51383488	2	normal	66.4552	somatic	0
18	72376640	72664576	2	normal	29.1212	somatic	0
18	73528384	73750880	2	normal	26.1093	somatic	0
19	65440	91616	2	normal	31.1068	germline	1
19	91616	117792	4	gain	8.94784	germline	1
19	117792	222496	2	normal	32.0559	somatic	0
19	7303104	7342368	0	loss	-1	somatic	0
19	8337056	8363232	0	loss	-1	somatic	0
19	8847488	8899840	6	gain	3.78418	germline	1
19	9501888	9698208	2	normal	100	somatic	0
19	11674496	11779200	2	normal	41.0623	somatic	0
19	20495808	20718304	1	loss	-1	germline	1
19	21398880	21660640	2	normal	34.212	somatic	0
19	23820160	23833248	1	loss	-1	somatic	0
19	24513824	24618528	4	gain	2.68077	germline	1
19	24618528	24631616	5	gain	12.1823	germline	1
19	27733472	27746560	58	gain	74.5716	germline	1
19	27838176	27890528	4	gain	0.53722	germline	1
19	27890528	28060672	2	normal	23.4987	somatic	0
19	28060672	28204640	2	normal	17.8691	somatic	0
19	28204640	28387872	2	normal	100	germline	1
19	33191168	33295872	2	normal	100	somatic	0
19	33557632	33596896	1	loss	-1	somatic	0
19	36764192	36803456	5	gain	80.0665	germline	1
19	36803456	36842720	2	normal	100	somatic	0
19	37771968	37798144	3	gain	9.10182	germline	1
19	43700832	43766272	1	loss	-1	germline	1
19	48399424	48464864	3	gain	7.5659	germline	1
19	50598208	50650560	4	gain	5.96284	germline	1
19	52129504	52155680	1	loss	-1	somatic	0
20	1557472	1596736	0	loss	-1	germline	1
20	18126880	18283936	3	gain	1.62907	somatic	0
20	19658176	19723616	2	normal	34.5369	somatic	0
20	22066368	22157984	2	normal	64.5425	germline	1
20	25416896	25665568	2	normal	100	somatic	0
20	25731008	25757184	3	gain	1.32227	germline	1
20	25757184	25822624	1	loss	-1	germline	1
20	25822624	25992768	3	gain	0.197029	somatic	0
20	25992768	26058208	1	loss	-1	germline	1
20	26058208	26202176	3	gain	0.243891	somatic	0
20	26202176	26215264	7	gain	2.34868	germline	1
20	29421824	29487264	3	gain	0.147311	somatic	0
20	29487264	29578880	3	gain	0.407017	somatic	0
20	29578880	29644320	8	gain	15.2695	germline	1
20	32078688	32209568	1	loss	-1	somatic	0
20	32484416	32615296	2	normal	100	somatic	0
20	46514752	46527840	4	gain	16.4031	germline	1
20	62272704	62285792	1	loss	-1	somatic	0
21	0	9410272	6	gain	-1	germline	1
21	9410272	9593504	6	gain	0.239698	germline	1
21	9593504	9645856	6	gain	-1	germline	1
21	9645856	9685120	5	gain	2.5848	germline	1
21	9685120	9711296	16	gain	31.8846	germline	1
21	9711296	9724384	5	gain	3.2976	germline	1
21	9724384	9737472	4	gain	6.35711	germline	1
21	9776736	9829088	6	gain	-1	germline	1
21	9829088	9920704	7	gain	0.275235	germline	1
21	9920704	9986144	5	gain	0.564261	germline	1
21	9986144	10208640	7	gain	0.293646	germline	1
21	10208640	10365696	4	gain	-1	germline	1
21	10365696	10640544	4	gain	1.63865	somatic	0
21	10640544	10705984	4	gain	-1	germline	1
21	10705984	10771424	7	gain	0.366306	germline	1
21	10771424	10863040	5	gain	0.642068	germline	1
21	10863040	11020096	4	gain	1.8683	germline	1
21	11020096	11177152	10	gain	0.182068	germline	1
21	11177152	14344448	10	gain	-1	germline	1
21	14344448	14370624	5	gain	2.46114	germline	1
21	14370624	14449152	3	gain	0.506832	germline	1
21	16307648	16320736	2	normal	100	somatic	0
21	18440992	18532608	2	normal	60.2338	somatic	0
21	20417280	20587424	2	normal	64.5425	somatic	0
21	22655328	22707680	2	normal	43.0288	somatic	0
21	22943264	23047968	2	normal	100	somatic	0
21	24867200	24919552	2	normal	100	somatic	0
21	26843488	26987456	2	normal	37.3748	somatic	0
21	29448000	29696672	2	normal	37.3283	somatic	0
21	41816160	41907776	2	normal	56.9132	somatic	0
21	43962592	43988768	3	gain	-1	somatic	0
22	17367776	17393952	3	gain	0.718888	somatic	0
22	17551008	18205408	1	loss	1.70165	somatic	0
22	18676576	18715840	1	loss	-1	germline	1
22	18715840	18728928	3	gain	2.88197	germline	1
22	18728928	18872896	1	loss	-1	germline	1
22	18872896	18885984	8	gain	20.3653	germline	1
22	20312576	20705216	1	loss	-1	germline	1
22	21647552	21765344	1	loss	-1	germline	1
22	21765344	21804608	1	loss	-1	germline	1
22	21804608	21909312	1	loss	-1	germline	1
22	24055744	24068832	1	loss	-1	somatic	0
22	24343680	24396032	0	loss	-1	germline	1
22	24775584	24958816	2	normal	100	somatic	0
22	25665568	25914240	1	loss	-1	somatic	0
22	26241440	26254528	2	normal	100	somatic	0
22	29461088	29474176	1	loss	-1	somatic	0
22	29892992	29919168	1	loss	-1	somatic	0
22	29919168	29997696	1	loss	45.3144	somatic	0
22	30809152	30940032	2	normal	47.0319	somatic	0
22	31947808	31960896	1	loss	-1	somatic	0
22	34028800	34068064	2	normal	100	somatic	0
22	36711840	36738016	3	gain	8.89685	somatic	0
22	36738016	36751104	3	gain	100	somatic	0
22	36751104	36790368	2	normal	100	somatic	0
22	36790368	36803456	1	loss	-1	somatic	0
22	36803456	36881984	1	loss	-1	somatic	0
22	38086080	38125344	1	loss	-1	somatic	0
22	38138432	38360928	2	normal	100	somatic	0
22	38360928	38374016	1	loss	-1	somatic	0
22	39237824	39264000	2	normal	100	somatic	0
22	39394880	39407968	1	loss	-1	somatic	0
22	40860736	40886912	2	normal	100	somatic	0
22	40886912	41017792	1	loss	-1	somatic	0
22	41017792	41449696	1	loss	-1	somatic	0
22	41475872	41698368	1	loss	-1	somatic	0
22	41698368	41776896	1	loss	-1	somatic	0
22	41776896	41829248	1	loss	-1	somatic	0
22	41829248	41855424	1	loss	-1	somatic	0
22	41855424	41894688	1	loss	-1	somatic	0
22	41894688	43334368	1	loss	0.989077	somatic	0
22	43360544	43609216	1	loss	-1	somatic	0
22	44800224	44813312	2	normal	100	somatic	0
22	45755648	45808000	2	normal	100	germline	1
22	46959744	46972832	2	normal	54.5684	somatic	0
22	50218656	50244832	1	loss	30.7282	somatic	0
22	50244832	50257920	2	normal	100	somatic	0
22	50519680	50545856	2	normal	100	germline	1
22	51030112	51043200	1	loss	-1	somatic	0
X	78528	91616	3	gain	8.65827	germline	1
X	143968	157056	0	loss	-1	germline	1
X	157056	170144	2	gain	14.3348	germline	1
X	1033952	1047040	0	loss	-1	germline	1
X	2709216	2827008	2	gain	-1	somatic	0
X	2827008	2853184	2	gain	100	somatic	0
X	2853184	2866272	2	gain	43.0283	somatic	0
X	2866272	2905536	2	gain	-1	somatic	0
X	2905536	2918624	2	gain	100	somatic	0
X	2918624	3036416	2	gain	-1	somatic	0
X	3036416	3049504	2	gain	93.9141	somatic	0
X	3049504	3219648	2	gain	-1	somatic	0
X	3219648	3232736	2	gain	81.1278	somatic	0
X	3232736	3245824	2	gain	-1	somatic	0
X	3245824	3258912	2	gain	29.447	somatic	0
X	3258912	3298176	2	gain	-1	somatic	0
X	3298176	3337440	2	gain	100	somatic	0
X	3337440	3363616	2	gain	-1	somatic	0
X	3363616	3376704	2	gain	60.3743	somatic	0
X	3376704	3442144	2	gain	-1	somatic	0
X	3442144	3455232	2	gain	100	somatic	0
X	3455232	3468320	2	gain	-1	somatic	0
X	3468320	3494496	2	gain	100	somatic	0
X	3494496	3559936	2	gain	82.1445	somatic	0
X	3573024	3677728	2	gain	-1	somatic	0
X	3677728	3690816	2	gain	60.3743	somatic	0
X	3690816	3743168	2	gain	-1	somatic	0
X	3743168	3834784	0	loss	-1	germline	1
X	3860960	3900224	2	gain	-1	somatic	0
X	3900224	3913312	2	gain	100	somatic	0
X	3913312	4135808	2	gain	-1	somatic	0
X	4135808	4148896	2	gain	26.1898	somatic	0
X	4148896	4201248	2	gain	-1	somatic	0
X	4201248	4214336	2	gain	100	somatic	0
X	4214336	4305952	2	gain	-1	somatic	0
X	4305952	4319040	2	gain	100	somatic	0
X	4319040	4397568	2	gain	-1	somatic	0
X	4397568	4410656	2	gain	100	somatic	0
X	4410656	4790208	2	gain	-1	somatic	0
X	4790208	4803296	2	gain	100	somatic	0
X	4803296	4855648	2	gain	-1	somatic	0
X	4855648	4868736	2	gain	100	somatic	0
X	4868736	4960352	2	gain	-1	somatic	0
X	4960352	4973440	2	gain	100	somatic	0
X	4973440	5130496	2	gain	-1	somatic	0
X	5130496	5143584	2	gain	100	somatic	0
X	5143584	5209024	2	gain	-1	somatic	0
X	5209024	5222112	2	gain	100	somatic	0
X	5222112	5405344	2	gain	-1	somatic	0
X	5405344	5418432	2	gain	52.2585	somatic	0
X	5418432	5601664	2	gain	-1	somatic	0
X	5601664	5614752	2	gain	100	somatic	0
X	5614752	5627840	2	gain	30.1872	somatic	0
X	5627840	5680192	2	gain	-1	somatic	0
X	5680192	5693280	2	gain	52.2585	somatic	0
X	5693280	5771808	2	gain	-1	somatic	0
X	5771808	5811072	2	gain	64.5425	somatic	0
X	5811072	5941952	2	gain	-1	somatic	0
X	5941952	5955040	2	gain	100	somatic	0
X	5955040	6007392	2	gain	-1	somatic	0
X	6007392	6020480	2	gain	100	somatic	0
X	6020480	6046656	2	gain	-1	somatic	0
X	6046656	6059744	2	gain	60.3743	somatic	0
X	6059744	6177536	2	gain	-1	somatic	0
X	6177536	6386944	2	gain	64.5425	somatic	0
X	6386944	6465472	2	gain	-1	somatic	0
X	6465472	6478560	2	gain	100	somatic	0
X	6478560	6596352	2	gain	-1	somatic	0
X	6596352	6622528	2	gain	100	somatic	0
X	6622528	6635616	2	gain	100	somatic	0
X	6635616	6831936	2	gain	-1	somatic	0
X	6831936	6845024	2	gain	100	somatic	0
X	6845024	6949728	2	gain	-1	somatic	0
X	6949728	6962816	2	gain	100	somatic	0
X	6962816	7028256	2	gain	-1	somatic	0
X	9371008	9384096	2	gain	11.1619	germline	1
X	17799680	17812768	1	normal	100	somatic	0
X	30809152	30822240	2	gain	42.5679	germline	1
X	49210880	49223968	2	gain	100	germline	1
X	49223968	49237056	2	gain	42.7998	germline	1
X	52103328	52482880	0	loss	-1	somatic	0
X	56657952	56671040	0	loss	-1	somatic	0
X	58555712	58568800	6	gain	5.91176	germline	1
X	58568800	58581888	26	gain	100	germline	1
X	61683744	61696832	15	gain	100	germline	1
X	61696832	61709920	11	gain	26.652	germline	1
X	61709920	61723008	24	gain	100	germline	1
X	61723008	61736096	7	gain	2.66698	germline	1
X	61827712	61840800	2	gain	100	germline	1
X	72324288	72337376	2	gain	100	somatic	0
X	76865824	77009792	0	loss	-1	somatic	0
X	103277408	103290496	1	normal	100	somatic	0
X	114964992	114978080	2	gain	100	germline	1
X	114978080	114991168	2	gain	60.2338	germline	1
X	114991168	115004256	3	gain	100	germline	1
X	115004256	115017344	2	gain	-1	germline	1
X	134845664	134884928	2	gain	36.0612	germline	1
X	136507840	136520928	2	gain	100	somatic	0
X	149582752	149595840	1	normal	43.0283	somatic	0
X	152226528	152344320	0	loss	-1	germline	1
X	154530016	154543104	1	normal	100	somatic	0
Y	3311264	3324352	2	gain	-1	somatic	0
Y	6112096	6125184	2	gain	100	somatic	0
Y	6125184	6138272	2	gain	100	somatic	0
Y	9174688	9187776	3	gain	43.5217	germline	1
Y	9187776	9200864	3	gain	10.502	germline	1
Y	9200864	9213952	3	gain	10.7212	germline	1
Y	9213952	9227040	3	gain	85.8113	germline	1
Y	9227040	9240128	3	gain	72.0919	germline	1
Y	9292480	9305568	3	gain	20.7422	germline	1
Y	9305568	9318656	3	gain	56.7778	germline	1
Y	9318656	9331744	3	gain	100	germline	1
Y	9331744	9371008	3	gain	7.91584	germline	1
Y	9920704	9933792	2	gain	29.4008	germline	1
Y	9933792	9959968	4	gain	0.449446	germline	1
Y	9959968	9973056	4	gain	3.42608	germline	1
Y	9973056	9986144	5	gain	1.27819	germline	1
Y	9986144	9999232	4	gain	2.19829	germline	1
Y	9999232	10051584	3	gain	0.199414	germline	1
Y	10077760	10090848	3	gain	100	germline	1
Y	10090848	13114176	2	gain	-1	somatic	0
Y	13114176	13127264	4	gain	100	somatic	0
Y	13140352	13192704	2	gain	-1	somatic	0
Y	13245056	13258144	3	gain	1.74312	germline	1
Y	13258144	13271232	4	gain	3.41897	germline	1
Y	13271232	13284320	5	gain	1.94092	germline	1
Y	13284320	13297408	5	gain	2.4708	germline	1
Y	13297408	13336672	3	gain	0.287248	germline	1
Y	13336672	13362848	2	gain	2.72125	germline	1
Y	13362848	13375936	2	gain	9.90987	germline	1
Y	13375936	13402112	3	gain	1.23046	germline	1
Y	13402112	13415200	5	gain	1.67133	germline	1
Y	13415200	13428288	4	gain	3.26843	germline	1
Y	13428288	13441376	4	gain	1.70302	germline	1
Y	13441376	13454464	6	gain	1.73077	germline	1
Y	13454464	13467552	15	gain	9.53893	germline	1
Y	13467552	13493728	17	gain	4.28825	germline	1
Y	13493728	13559168	2	gain	1.52119	germline	1
Y	13676960	13690048	5	gain	100	germline	1
Y	13690048	13703136	6	gain	2.39104	germline	1
Y	13703136	13716224	5	gain	9.80116	germline	1
Y	13716224	13729312	4	gain	5.93469	germline	1
Y	13729312	13742400	3	gain	2.01587	germline	1
Y	13834016	13847104	7	gain	30.1602	germline	1
Y	13847104	13873280	2	gain	26.6269	germline	1
Y	22223424	22236512	1	normal	43.8184	somatic	0
Y	22275776	22288864	2	gain	12.3012	germline	1
Y	22301952	22328128	1	normal	23.5987	somatic	0
Y	28780512	28793600	2	gain	8.28842	germline	1
Y	28793600	28806688	3	gain	2.22308	germline	1
Y	28806688	28819776	9	gain	4.5271	germline	1
Y	58817472	58830560	85	gain	49.5561	germline	1
Y	58830560	58869824	62	gain	11.5985	germline	1
Y	58869824	58882912	56	gain	46.1281	germline	1
Y	58882912	58909088	63	gain	100	germline	1
Y	58974528	59000704	12	gain	2.03372	germline	1
Y	59000704	59026880	11	gain	1.26732	germline	1
Y	59026880	59039968	5	gain	2.26476	germline	1
