# Supplementary material for: Next-Generation Sequence Analysis of Cancer Xenograft Models
Source: PLoS One. 2013 Sep 26;8(9):e74432. doi: 10.1371/journal.pone.0074432 (PMC3784448; doi:10.1371/journal.pone.0074432)
Supplement: Dataset S3 — Inter- and intrachromosomal rearrangements common to both the NCI-H209 cell line and its derived xenograft sample. (PDF) [file pone.0074432.s011.pdf]

## Sheet: Intra-interchr. rearrengements
Dataset S3. Inter- and intrachromosomal rearrangements common to both the NCI-H209 cell line and its derived xenograft sample.
FusionID	SeedCount	Strand	Chromosome1	Position1	Chromosome2	Position2	KnownGene1	KnownGeneStrand1	KnownGene2	KnownGeneStrand2	FusionJunctionSequence	FusionGene	xh209mouse_clean.UniqueCuttingPositionCount	xh209mouse_clean.SeedCount
FUS_1066162121_1149184653(-+)	5	-+	16	87467402	17	80135118	ZCCHC14	-	CCDC57	-		CCDC57->ZCCHC14	3	3
FUS_120567621_145253782(-+)	4	-+	1	120567622	1	145253783	NOTCH2	-	NOTCH2NL	+	GTACCTTCACGATAAAAAAAAAAACAAAACaaaactgtaaatgtgggtttcatatagttt	NOTCH2->NOTCH2NL	5	5
FUS_120573973_145247455(-+)	4	-+	1	120573974	1	145247456	NOTCH2	-	NOTCH2NL	+	GCCTGGTATTTAGTAAGTTCTATGTGTTAGcctattattattactattaccatttaaaaa	NOTCH2->NOTCH2NL	5	5
FUS_1447675469_2586421166(++)	4	++	2	160224398	7	152103535	BAZ2B	-	MLL3	-	AGCCTGGGAGATAGAGTGAGAATCTGTCTCaaaaaaaaggcatcaaaaatggctaaaaga	MLL3->BAZ2B	7	8
FUS_1604711590_2586259430(++)	3	++	21	11035559	7	151941799	BAGE4,BAGE5,BAGE2,BAGE3	----	MLL3	-		MLL3->BAGE4,BAGE5,BAGE2,BAGE3	4	4
FUS_1604714003_2586261856(++)	3	++	21	11037972	7	151944225	BAGE4,BAGE5,BAGE2,BAGE3	----	MLL3	-		MLL3->BAGE4,BAGE5,BAGE2,BAGE3	4	4
FUS_1604716860_2586271045(++)	3	++	21	11040829	7	151953414	BAGE4,BAGE5,BAGE2,BAGE3	----	MLL3	-		MLL3->BAGE4,BAGE5,BAGE2,BAGE3	4	4
FUS_1604716870_2586271051(--)	3	--	21	11040839	7	151953420	BAGE4,BAGE5,BAGE2,BAGE3	----	MLL3	-		BAGE4,BAGE5,BAGE2,BAGE3->MLL3	4	4
FUS_1604721544_2586275732(--)	3	--	21	11045513	7	151958101	BAGE4,BAGE5,BAGE2,BAGE3	----	MLL3	-		BAGE4,BAGE5,BAGE2,BAGE3->MLL3	4	4
FUS_1604721605_2586275802(--)	6	--	21	11045574	7	151958171	BAGE4,BAGE5,BAGE2,BAGE3	----	MLL3	-	ATAAAAATGTATCTTTTGAAAAGCTTAATAgaggtaactgtttggattgatggttgtaat	BAGE4,BAGE5,BAGE2,BAGE3->MLL3	4	4
FUS_1604721656_2586275860(++)	3	++	21	11045625	7	151958229	BAGE4,BAGE5,BAGE2,BAGE3	----	MLL3	-		MLL3->BAGE4,BAGE5,BAGE2,BAGE3	4	4
FUS_1604731575_2586285829(++)	3	++	21	11055544	7	151968198	BAGE4,BAGE5,BAGE2,BAGE3	----	MLL3	-		MLL3->BAGE4,BAGE5,BAGE2,BAGE3	4	4
FUS_1604733247_2586287491(++)	7	++	21	11057216	7	151969860	BAGE4,BAGE5,BAGE2,BAGE3	----	MLL3	-	GAAAATGAAATTAGGTTACTCAACAAAGATaaagggtaatgatcatgtagactaactgta	MLL3->BAGE4,BAGE5,BAGE2,BAGE3	4	4
FUS_1604734439_2586288669(--)	5	--	21	11058408	7	151971038	BAGE4,BAGE5,BAGE2,BAGE3,BAGE	-----	MLL3	-	CAGGTTCCATTTGTTTACTTGTGATGTACAgagagttttttataccttcccagcttatat	BAGE4,BAGE5,BAGE2,BAGE3,BAGE->MLL3	3	3
FUS_1604736059_2586290304(--)	3	--	21	11060028	7	151972673	BAGE4,BAGE5,BAGE2,BAGE3,BAGE	-----	MLL3	-		BAGE4,BAGE5,BAGE2,BAGE3,BAGE->MLL3	3	3
FUS_1604736061_2586290308(--)	7	--	21	11060030	7	151972677	BAGE4,BAGE5,BAGE2,BAGE3,BAGE	-----	MLL3	-	ATTACACTTTATCAATGAAGACAAATATTTtttattttctgtgtttctaatgcattaata	BAGE4,BAGE5,BAGE2,BAGE3,BAGE->MLL3	3	3
FUS_1604737382_2586291617(++)	7	++	21	11061351	7	151973986	BAGE4,BAGE5,BAGE2,BAGE3,BAGE	-----	MLL3	-	ACAGGGAGTAAGAAAAGGAAAAAAAGTAACatgttataataatattttcccatattaatc	MLL3->BAGE4,BAGE5,BAGE2,BAGE3,BAGE	3	3
FUS_1604740209_2586294411(++)	8	++	21	11064178	7	151976780	BAGE4,BAGE5,BAGE2,BAGE3,BAGE	-----	MLL3	-	AACACACATTTCTGATTGAAACATCTGTTAaaaaaataacatcaaacgacattacaaaat	MLL3->BAGE4,BAGE5,BAGE2,BAGE3,BAGE	3	3
FUS_1604740212_2586294415(--)	3	--	21	11064181	7	151976784	BAGE4,BAGE5,BAGE2,BAGE3,BAGE	-----	MLL3	-		BAGE4,BAGE5,BAGE2,BAGE3,BAGE->MLL3	3	3
FUS_1604743079_2586297297(--)	10	--	21	11067048	7	151979666	BAGE4,BAGE5,BAGE2,BAGE3,BAGE	-----	MLL3	-	TGGCTTTGTACTTCGTATAATTGAGCTACTaagtactgttttctgtcatctttcatgtat	BAGE4,BAGE5,BAGE2,BAGE3,BAGE->MLL3	3	3
FUS_1604744724_2586298945(--)	4	--	21	11068693	7	151981314	BAGE4,BAGE5,BAGE2,BAGE3,BAGE	-----	MLL3	-	CTCCTTTTACCAAAACCAAACATAAAAAAGattttttttcaaaatcatgagttgatattt	BAGE4,BAGE5,BAGE2,BAGE3,BAGE->MLL3	3	3
FUS_1604745004_2586299225(++)	3	++	21	11068973	7	151981594	BAGE4,BAGE5,BAGE2,BAGE3,BAGE	-----	MLL3	-		MLL3->BAGE4,BAGE5,BAGE2,BAGE3,BAGE	3	3
FUS_1604745268_2586299480(++)	6	++	21	11069237	7	151981849	BAGE4,BAGE5,BAGE2,BAGE3,BAGE	-----	MLL3	-	AAATGGTGGTAGAGACAAAATACTTTAACAgacatgtcaccaaagatacacaaatggcaa	MLL3->BAGE4,BAGE5,BAGE2,BAGE3,BAGE	3	3
FUS_1604750108_2586304327(++)	4	++	21	11074077	7	151986696	BAGE4,BAGE5,BAGE2,BAGE3,BAGE	-----	MLL3	-	TGACATATTTCTTCAAAAATGAATAAAGTGagcctgtcacttcaaggaaaacaacttaga	MLL3->BAGE4,BAGE5,BAGE2,BAGE3,BAGE	3	3
FUS_1604751720_2586306032(++)	4	++	21	11075689	7	151988401	BAGE4,BAGE5,BAGE2,BAGE3,BAGE	-----	MLL3	-	CTATATCTAACAAAAATTCATAGGATTTGAtgatgatgaagtccacaaatgcaagtcaaa	MLL3->BAGE4,BAGE5,BAGE2,BAGE3,BAGE	3	3
FUS_1604760026_2586397856(--)	3	--	21	11083995	7	152080225	BAGE4,BAGE5,BAGE2,BAGE3,BAGE	-----	MLL3	-		BAGE4,BAGE5,BAGE2,BAGE3,BAGE->MLL3	3	3
FUS_1604763271_2586400936(--)	3	--	21	11087240	7	152083305	BAGE4,BAGE5,BAGE2,BAGE3,BAGE	-----	MLL3	-		BAGE4,BAGE5,BAGE2,BAGE3,BAGE->MLL3	3	3
FUS_1604765182_2586402896(++)	3	++	21	11089151	7	152085265	BAGE4,BAGE5,BAGE2,BAGE3,BAGE	-----	MLL3	-		MLL3->BAGE4,BAGE5,BAGE2,BAGE3,BAGE	3	3
FUS_1604765235_2586402955(--)	3	--	21	11089204	7	152085324	BAGE4,BAGE5,BAGE2,BAGE3,BAGE	-----	MLL3	-		BAGE4,BAGE5,BAGE2,BAGE3,BAGE->MLL3	3	3
FUS_1604769572_2586407327(++)	5	++	21	11093541	7	152089696	BAGE4,BAGE5,BAGE2,BAGE3,BAGE	-----	MLL3	-	GCAGTGTTTAATGAACTTGCCTAAAGCCACcatcagaaccaccaggaagcacaatttcat	MLL3->BAGE4,BAGE5,BAGE2,BAGE3,BAGE	3	3
FUS_1604772075_2586409742(++)	6	++	21	11096044	7	152092111	BAGE4,BAGE5,BAGE2,BAGE3,BAGE	-----	MLL3	-	CCAAAATAGGGTACTGGTAGGCAGTTTGCAaaaaaaaagtgacaaatataatcaatttaa	MLL3->BAGE4,BAGE5,BAGE2,BAGE3,BAGE	3	3
FUS_214656361_2197525901(-+)	5	-+	1	214656362	5	115238606	PTPN14	-	AP3S1	+	GACAAGGTTCACAGTATTCTTGCAGAAATAgtgatggggggaatggtattggagacaaat	PTPN14->AP3S1	6	6
FUS_348543055_2837520638(+-)	26	+-	10	99292432	9	97700287	UBTD1	+	C9orf3	+	TGGGCGTGGTGGCGGGCACCTGTAGTCCCAgctactcgggaggctgaggcaggagaatcg	C9orf3->UBTD1	7	13
FUS_544770158_2054124035(++)	3	++	12	24978223	4	162991044	BCAT1	-	FSTL5	-		FSTL5->BCAT1	3	3
FUS_837317572_2435262898(+-)	3	+-	14	68503813	7	945267	RAD51L1	+	ADAP1	-		RAD51L1->ADAP1	3	3
FUS_837352384_2320673961(++)	6	++	14	68538625	6	57471402	RAD51L1	+	PRIM2	+	CCTGGTCCAGGGCTTTTTCTGGTTGATAGTttttttattccagattcaatttcagacctt	RAD51L1->PRIM2	3	3
FUS_86586715_246575020(++)	4	++	1	86586716	1	246575021	COL24A1	-	SMYD3	-	AAGCTGGAACCATCATTCTGAGCAAACTATccaaggacaaaaaaccaaacaccgcatgtt	SMYD3->COL24A1	6	6
