# Supplementary material for: Next-Generation Sequence Analysis of Cancer Xenograft Models
Source: PLoS One. 2013 Sep 26;8(9):e74432. doi: 10.1371/journal.pone.0074432 (PMC3784448; doi:10.1371/journal.pone.0074432)
Supplement: Dataset S4 — Somatic variants detected in both the cell line and xenograft samples. (PDF) [file pone.0074432.s012.pdf]

## Sheet: Somatic Variants
Dataset S4. Somatic variants detected in both the cell line and xenograft samples
Chrom	Pos	ID	Ref	Alt	Qual
1	985266	rs2275813	C	T	117.22
1	1588670	rs61774958	G	A	306.16
1	2537838	rs41300092	C	T	302.46
1	10357206	rs199617049	A	AT	109.26
1	12854414	rs1063769	G	A	185.16
1	12854474	rs1063774	A	C	333.41
1	12854479	rs1063775	C	G	327.17
1	12887375		A	T	5633.14
1	16890428	rs3900708	T	A	1277.16
1	16907854	rs9729861	T	A	1595.16
1	16957983	rs2761548	C	T	387.29
1	16958063	rs2779441	C	T	1798.16
1	16974666	rs28503658	C	T	978.16
1	17018972		G	A	54.15
1	17030504	rs601031	T	A	1813.16
1	17030590	rs590170	G	A	826.16
1	17287414	rs2273113	T	C	333.61
1	25599086		G	C	809.33
1	31712314	rs12025507	C	T	190.55
1	39893581		A	G	449.16
1	43223488		C	T	7114.16
1	43919413	rs6692611	A	G	419.99
1	47904000	rs78469326	G	A	216.87
1	55555285	rs548852	G	A	342.21
1	57602334	rs564665	G	A	466.6
1	58946539	rs149406560	C	CT	263.51
1	62673287	rs2457828	A	C	70.5
1	62740017		T	C	860.16
1	63153953	rs4344355	C	T	57.18
1	65864496		C	G	4111.16
1	70890069		G	T	615.16
1	74834974		A	G	2446.16
1	85039955	rs2303307	G	A	359.26
1	89618472	rs201876923	G	A	175.18
1	93649732	rs6682670	A	G	446.55
1	103468295	rs2622875	C	A	591.16
1	103468296		T	A	614.16
1	104256478	rs167447	T	A	98.69
1	112298709		G	T	563.16
1	114401097		T	G	1168.16
1	116382318	rs883555	A	G	352.36
1	121303946		G	A	510.16
1	143239340	rs74795199	G	A	230.48
1	143239358	rs75087779	C	T	141.16
1	145303906	rs77014420	G	A	1343.16
1	149581257	rs201261274	T	C	152.18
1	151298726		T	C	2298.16
1	153652200		C	A	3794.16
1	154744706		C	A	1161.16
1	161696782	rs11585450	G	C	98.55
1	167408702		G	A	1108.16
1	167849781		G	T	1421.16
1	168717024	rs12728858	C	T	108.91
1	176659417		C	A	1624.16
1	183885577		C	A	5302.16
1	186123108		C	T	368.16
1	192316410		AG	A	3221.02
1	193969168		C	A	941.16
1	197390923		G	T	1211.16
1	197390924		G	T	1166.16
1	201438087		G	GGA	262.06
1	203799286		G	A	956.16
1	207242937		G	T	1704.16
1	222821211	rs61824282	C	T	217.91
1	225334800	rs1480104	T	A	391.55
1	225552624	rs10495239	G	A	349.55
1	225552650	rs12563830	C	T	112.16
1	228347352	rs6668719	A	G	2822.16
1	228444297	rs7532141	T	G	2228.16
1	228464842	rs936885	C	G	2127.16
1	228465346	rs493945	A	G	4179.16
1	228465370	rs867599	T	G	5056.16
1	228471046	rs41303079	C	T	477.16
1	228471379	rs56168609	G	C	1989.16
1	228480282	rs1150908	A	G	1180.16
1	228482010	rs449133	C	T	4946.16
1	228492044	rs1150910	G	A	749.16
1	228492125	rs56335580	C	T	2421.16
1	228494382	rs1150911	T	G	4560.16
1	228494790	rs435776	G	A	3435.16
1	228503677	rs1150912	A	G	2912.16
1	228504472	rs1188732	T	C	1607.16
1	228504670	rs11810627	C	T	549.16
1	228504701	rs111792077	G	GCTCC	1125.12
1	228505668	rs1188729	C	G	4333.16
1	228505699	rs1188728	T	C	4232.16
1	228509427	rs373610	A	G	3703.16
1	228520880	rs416564	C	T	975.16
1	228520973	rs369909	C	G	1824.16
1	228523618	rs1757160	G	A	1664.16
1	228524919	rs3795807	G	A	1675.16
1	228524961	rs3795808	C	A	1108.16
1	228525627	rs1757127	C	A	2440.16
1	228526486	rs58480216	G	A	526.16
1	228526665	rs505629	T	C	504.16
1	228528412	rs1150916	G	A	2977.16
1	231076227		GT	G	3406.12
1	231175644	rs12025055	C	G	209.14
1	236381897	rs1615601	T	A	194.29
1	236381917	rs1614938	T	A	105.23
1	238053115		C	A	783.16
1	238053338		C	A	4001.16
1	240370985	rs111896385	C	T	304.55
1	240371046	rs201199944	A	G	84.91
1	240371049	rs149715160	C	G	82.91
1	248039261		C	T	1707.16
1	248790146		C	A	1822.16
2	4135869		T	C	591.16
2	10141384		A	G	2585.16
2	20990103		CAA	C	2554.12
2	23926235		A	C	1929.16
2	33740313		G	A	2315.16
2	38542573	rs12712583	T	C	396.55
2	47403615		C	T	2519.16
2	48022981	rs1800934	G	T	456.91
2	61605576		G	A	717.16
2	71061037		A	G	1886.16
2	73681199		G	A	853.16
2	76975756		C	A	1296.16
2	85108252	rs34667238	G	GC	231.92
2	87373719		G	T	3867.16
2	89292476	rs70958972	T	TTGTGCCCTGGGAACATGCAAA	4169.86
2	90078002		TC	T	4353.12
2	90078005		A	G	2936.16
2	90139002		C	A	1535.16
2	90139003		C	A	1498.16
2	90219247		C	A	1480.16
2	90229141		A	G	1608.16
2	91777703	rs4082168	A	G	728.17
2	91777718	rs1868875	C	T	849.16
2	91944085	rs10210041	T	C	586.21
2	91944092	rs79118727	G	T	568.16
2	91944129	rs80315793	T	C	755.2
2	91944209	rs201573449	T	A	607.91
2	96687428	rs59812668	GC	G	302.16
2	97508082	rs58147284	G	C	164.19
2	97827737	rs76168297	C	T	94.17
2	102486655		A	G	186.21
2	102957628	rs112164401	CT	C	198.22
2	103013376		C	T	287.16
2	103040370		GC	G	740.12
2	110372192	rs6594048	A	G	236.5
2	112615875	rs200985332	A	C	231.65
2	113074790		G	T	102.3
2	116539846	rs36082071	GA	G	190.1
2	119604331		C	G	852.16
2	120223336		G	C	2881.16
2	128421829	rs79110686	G	A	220.14
2	148716428	rs2307394	T	C	572.14
2	160676445	rs36120198	A	AT	438.13
2	163083033		C	A	87.26
2	167279922	rs6738031	C	A	424.17
2	169996193		C	A	2699.16
2	173831950		A	T	2382.16
2	178098087	rs139080704	CA	C	364.22
2	179349227	rs9967820	T	G	307.56
2	179484511		T	A	1131.16
2	182521578	rs1473295	G	A	95.21
2	191926427		C	A	1428.16
2	201399917	rs10497848	G	T	496.14
2	207437941		G	T	3275.16
2	207530673		A	G	2982.16
2	223513437	rs184464778	T	C	737.16
2	225633617		A	G	1040.16
2	231363252	rs34979917	TA	T	210.89
2	233274620		A	G	1061.16
2	239039637	rs4663845	T	C	142.14
2	241558439		G	C	3271.16
2	241659323	rs191428830	C	A	3728.16
3	9102112		C	T	136.16
3	10105665		C	G	327.16
3	33893950		C	T	63.34
3	42632350		T	A	4488.14
3	49941058		C	A	1643.14
3	51422741	rs61570769	C	CGGA	269.12
3	73673578	rs6763344	G	C	177.46
3	75713909	rs200437260	G	C	679.16
3	75713958	rs200796097	C	T	801.16
3	75713963	rs201760247	C	T	839.32
3	75714185	rs201518724	C	T	660.16
3	75779709	rs147717594	C	T	230.17
3	75779724	rs201165307	T	C	252.16
3	75779727	rs187126715	A	G	296.41
3	75781318	rs140240604	A	C	111.16
3	75781338	rs150289122	A	G	123.21
3	75786888	rs1615736	C	T	879.16
3	75986717	rs78834776	G	A	1063.16
3	75986813	rs77101234	T	A	651.6
3	108159816		T	C	1830.16
3	130128902		G	A	593.16
3	133547216	rs2293375	T	C	76.36
3	136728886	rs361235	G	T	80.63
3	141709083	rs6440055	A	G	94.6
3	142051147	rs4608715	T	C	96.55
3	142521224	rs34958020	C	CT	100.51
3	148895578		T	G	145.69
3	153973926	rs173328	T	G	642.91
3	157146156		A	G	3622.16
3	173322773		G	A	2529.16
3	179605647	rs41265425	C	A	383.26
3	185697415		A	G	684.16
3	186358252		G	C	1473.16
3	186794764	rs199950134	G	GT	1079.12
3	190026193		G	A	2131.16
3	195412592		G	C	184.16
3	195412788	rs28719693	T	C	372.17
3	196555650		T	A	1657.16
3	196627335	rs6764463	T	C	227.14
4	7044357	rs871133	A	G	179.55
4	7941318	rs60272249	T	C	87.15
4	7941346	rs58349148	G	C	60.15
4	13611071		C	A	208.16
4	15004655	rs7435318	G	A	88.92
4	27025092	rs35840384	GA	G	105.8
4	38942697	rs11398065	C	CT	195.13
4	47034352		A	G	1059.16
4	62849145		G	T	3278.16
4	62849146		G	T	3233.06
4	68749553		C	G	184.26
4	69493872	rs62319284	A	G	270.16
4	71001769	rs800940	A	T	128.22
4	76734343	rs17284996	C	T	403.16
4	81561809		G	A	2562.16
4	84352750	rs12645412	T	C	193.47
4	84397691		C	A	373.16
4	84515958		G	T	2134.16
4	88766145		A	G	267.16
4	100048327	rs9307234	G	A	549.92
4	103822404	rs58374767	G	A	1612.16
4	110384668		C	A	991.16
4	123227023		T	A	145.19
4	123329252		A	G	269.16
4	128842931		A	G	538.16
4	136292794		C	A	1993.16
4	146056320	rs1804528	G	A	105.62
4	148563884		C	T	114.16
4	157732158		A	G	1157.16
4	164507039		T	G	1746.16
4	184205534		C	G	4288.16
5	474974	rs2721018	C	T	324.61
5	1219583		C	G	554.16
5	9630020		G	A	516.16
5	32379518		A	C	363.16
5	34832527		G	T	589.16
5	38819508	rs371260	T	C	79.14
5	39130689		T	C	633.16
5	42423905	rs2940928	A	G	129.22
5	45262121		C	A	1999.16
5	65613975		A	G	71.35
5	79172144		G	A	3228.29
5	79172145		G	T	3203.96
5	85582678		G	T	7269.14
5	98109985	rs2545730	G	A	78.61
5	110284867	rs75222151	T	C	644.16
5	114477023		C	A	663.17
5	114477024		C	A	668.17
5	131329781		G	T	1245.16
5	140558715		C	T	1357.16
5	140563728	rs2697532	A	G	81.14
5	140597855		A	G	1563.14
5	167956719	rs111777993	C	A	214.24
5	175528527	rs116633144	A	T	926.16
5	176068947	rs12515826	A	G	1417.33
5	176823596	rs74723663	C	G	876.56
5	177164044	rs200041092	G	A	379.01
6	397261	rs34318727	G	A	1218.16
6	397269	rs6942173	T	G	1059.16
6	397290	rs1775589	T	C	845.16
6	398775	rs2671422	G	A	2380.16
6	564515	rs2277096	G	T	1529.16
6	1391085	rs111257067	G	GGGC	432.0
6	1966966	rs12175531	C	T	4063.16
6	2623820	rs6902511	G	A	5019.16
6	2667876	rs12199057	A	T	584.26
6	2668002	rs12193611	C	G	4100.16
6	2668061	rs12193620	C	T	2754.16
6	2668071	rs12206682	G	C	2385.16
6	2675271	rs9328114	C	T	5004.16
6	3138194	rs1534998	T	C	381.55
6	3154871	rs17849443	A	C	3772.16
6	3157798	rs909964	G	A	990.21
6	3177404	rs3734485	G	T	7181.16
6	3259463	rs9501962	G	T	202.32
6	3438738	rs12197689	G	A	2785.16
6	3439510	rs9503595	T	C	2142.16
6	3439595	rs35613438	G	GA	3593.12
6	3439637	rs9502003	G	A	1985.16
6	4040922	rs9392551	A	G	1024.26
6	4715980	rs3812180	C	A	570.16
6	4716016	rs3812179	A	G	1012.16
6	4716037	rs3812178	T	C	1146.16
6	4716150	rs9502225	C	T	512.21
6	4734882	rs71311001	A	AGTGAGGG	525.17
6	4734898	rs62384815	A	T	175.19
6	4735035	rs13196069	T	C	3244.16
6	4735071	rs28360500	C	G	2934.16
6	4735146	rs35047361	C	T	1748.16
6	5086211	rs584962	G	C	595.94
6	5104221	rs34084655	CA	C	405.16
6	5109592	rs9606	T	G	4135.16
6	7107697	rs2031552	G	C	228.32
6	7229346	rs2714315	T	C	2052.16
6	7229619	rs12192672	G	A	3484.16
6	7247248	rs2256596	T	C	128.36
6	7250270	rs3778321	G	A	3402.16
6	7269423	rs76831056	G	A	7292.16
6	7289782	rs1050681	A	T	1212.16
6	7310259	rs10004	A	G	2168.16
6	7374207	rs2876098	T	G	1434.16
6	7828542	rs267177	C	T	5273.16
6	7831206	rs166495	A	T	1965.16
6	7840305	rs169123	C	T	1974.16
6	7986847	rs197129	G	A	2345.16
6	7988189	rs4959464	T	C	3114.16
6	8015129	rs2748376	T	C	1083.55
6	8428137	rs113480109	A	AAGT	4121.13
6	8430049	rs6918877	G	A	739.16
6	9705636	rs12215551	T	C	3143.16
6	9819565	rs16892602	C	A	616.16
6	10412788	rs146680207	G	A	1506.17
6	10415307	rs1800927	C	G	3635.16
6	10887251	rs9366663	T	C	809.55
6	10887253	rs9358956	G	C	847.36
6	10887276	rs9348724	C	G	1301.17
6	10942964	rs3798751	A	G	1556.16
6	10989942	rs12195587	G	A	1126.16
6	11538534	rs821443	C	T	7051.16
6	11538564	rs76140838	C	T	7343.16
6	13307824	rs2439537	C	T	1365.17
6	13321097	rs2496132	G	A	2800.16
6	13325279	rs2439553	C	T	785.17
6	13340151	rs2496169	C	T	3581.16
6	13361088	rs2496162	A	G	3098.16
6	13592135	rs3734674	C	T	2152.16
6	15487782	rs2076056	C	G	2897.16
6	15627553	rs16876738	C	G	1152.17
6	15627771	rs12525702	C	T	572.36
6	16143864	rs2072784	A	G	4185.16
6	16143897	rs2072783	A	G	4729.16
6	16145325	rs9370867	A	G	3798.16
6	16290848	rs147049568	T	TAC	3531.12
6	16306751	rs16885	G	A	2332.16
6	17102596	rs1473744	A	G	5070.16
6	17102600	rs5028763	A	G	4929.16
6	17115384	rs34224564	G	C	1038.16
6	17633033	rs61744976	G	C	1674.16
6	17688798	rs1065057	G	A	5536.16
6	17800131	rs41267716	G	T	1325.17
6	17873560	rs41267728	A	C	1002.19
6	18213988	rs6903583	C	T	4837.16
6	18387768	rs140710411	CTCCTG	C	12492.12
6	18427753	rs17627311	T	C	6422.16
6	18459736	rs2057555	A	C	1467.17
6	18463633	rs9371061	C	T	735.16
6	19840492	rs1047033	A	G	3996.16
6	20110043	rs77627773	C	G	1727.16
6	20758760	rs10946406	A	G	1275.16
6	24429249	rs6942189	C	T	3972.16
6	24436760	rs2273605	G	A	1720.16
6	24437408	rs61733145	G	A	3455.16
6	24456907	rs116287860	A	C	874.16
6	24460679	rs2793434	T	C	1272.16
6	24460707	rs2744576	A	T	953.17
6	24463055	rs2793442	A	G	3206.97
6	24475517	rs66707391	TATTA	T	1090.51
6	24559433	rs3903801	A	G	2872.16
6	25280119	rs6914799	C	A	6929.16
6	25507624	rs2769701	A	G	1083.16
6	25507639	rs35033684	T	G	1248.16
6	25507764	rs421502	G	A	689.17
6	25507784	rs376290	T	A	556.17
6	25507798	rs412384	G	A	520.17
6	25509976	rs4568443	T	C	2510.16
6	25511008	rs34965228	C	CAT	926.13
6	25727093	rs115737646	C	T	2323.16
6	25914853	rs34525648	G	A	3214.14
6	25925987	rs3734523	G	A	6133.16
6	26031962	rs34966100	G	A	4199.16
6	26032105	rs143413138	G	A	4710.16
6	26033641	rs2230654	G	A	4229.16
6	26093236	rs1800758	G	A	4862.16
6	26124376	rs16891335	G	A	7915.16
6	26184082	rs61978632	C	G	6518.16
6	26188864	rs16891378	A	G	1513.16
6	26188879	rs76079017	C	G	2116.16
6	26197493	rs41266801	C	A	4524.16
6	26199222	rs113561314	G	A	8538.16
6	26199822	rs41266807	A	G	6405.16
6	26200083	rs1059486	A	G	7650.16
6	26204833	rs61742993	T	G	1450.16
6	26216656	rs41266811	T	C	8579.16
6	26234883	rs2050950	A	G	1464.19
6	26240624	rs3734533	A	G	2429.16
6	26240649	rs3734534	C	T	2332.16
6	26252148	rs61746493	C	T	4853.16
6	26370605	rs9379860	T	C	4198.16
6	26370660	rs12205731	G	A	3273.16
6	26370833	rs58367598	T	G	2180.16
6	26374571	rs115820857	G	A	6265.16
6	26374658	rs2073526	G	A	5109.16
6	26390830	rs2076029	T	C	1818.16
6	26423560	rs4320356	C	T	6303.16
6	26423591	rs3846842	C	G	5577.16
6	26428198	rs142784664	A	G	3714.16
6	26451888	rs6935678	T	C	3742.16
6	26476380	rs76161919	C	T	4380.16
6	26746555	rs2932650	T	C	5197.9
6	27215486	rs41269253	C	A	1532.17
6	27215625	rs5030963	G	A	5725.16
6	27216699	rs5030965	G	T	4626.16
6	27216786	rs5030966	G	A	3857.16
6	27222974	rs2273565	C	T	3127.16
6	27326863	rs2235232	G	A	5165.16
6	27326983	rs140505698	G	GT	10771.12
6	27368123	rs766093	G	A	1037.16
6	28473410		T	A	1070.16
6	29760352	rs140982245	CGCGGGCGCCGTGGATGGAGCA	C	2747.44
6	29796265	rs17875401	G	T	323.6
6	30234700	rs3129704	T	C	927.2
6	30234721	rs3129705	G	A	611.17
6	30916718	rs2247178	G	A	271.26
6	32522389	rs36149991	T	G	301.55
6	32522401	rs36183131	G	A	506.55
6	32548667	rs28732284	T	C	337.55
6	32548681	rs9269764	T	C	410.2
6	32549401	rs16822974	T	C	1557.16
6	32549670	rs9269812	G	T	446.16
6	32552059	rs17883134	G	T	426.16
6	32552067	rs17882603	C	T	448.16
6	32605189	rs9272426	A	G	2107.17
6	32605207	rs3187964	C	G	1993.16
6	32609671	rs9272736	G	A	204.16
6	32609673	rs9272737	G	A	203.16
6	32609722	rs9272742	C	T	486.16
6	32609746	rs9272744	C	T	435.16
6	32609965	rs7990	C	A	734.16
6	32610008	rs2308890	C	T	904.16
6	32610009	rs2308891	C	G	911.16
6	32610059	rs34843907	T	G	785.17
6	32632700	rs1140313	T	A	614.77
6	33048628	rs1042136	A	C	909.23
6	33048663	rs1042153	G	A	598.16
6	33141161	rs2229785	A	G	66.56
6	35479876	rs2273003	C	G	144.73
6	36641562		G	T	1103.16
6	41897783		G	C	1240.16
6	52874250	rs55694702	G	C	3363.16
6	56566696		T	C	535.16
6	69794981		G	C	631.16
6	70877980	rs1464159	G	A	290.11
6	70916567		C	A	585.77
6	85446419		G	T	634.16
6	90497589	rs4707569	A	C	674.6
6	99284994		A	G	303.16
6	99858608		ATC	A	3056.12
6	110752289	rs1033572	G	A	196.91
6	121560155	rs12191616	C	T	220.92
6	123851590	rs12198164	G	A	206.32
6	129901198	rs202176182	G	GA	578.61
6	130152479	rs7758540	T	C	54.57
6	132859802		G	T	5016.16
6	147012309		G	A	1812.16
6	152527456		G	A	872.16
6	155578684	rs1048587	G	A	201.6
6	166743760	rs9348119	G	C	56.96
7	751055		C	T	2362.16
7	3180567		C	T	123.16
7	5765113		T	C	358.17
7	12372999	rs6460928	T	G	64.19
7	12417362	rs16877400	T	C	270.14
7	25198089	rs2523066	C	G	179.61
7	27170145	rs6944345	T	G	139.22
7	36579883		C	T	740.16
7	45632441		G	T	4487.16
7	45632442		G	T	4403.16
7	45960323	rs6950868	C	A	145.99
7	54614582	rs485006	G	T	263.91
7	54614585	rs657449	A	G	294.55
7	54825289		T	C	912.16
7	56871801	rs62461831	G	A	332.41
7	63225494		A	C	74.14
7	64864487		G	A	69.17
7	71250976		C	A	1738.14
7	72209576		C	G	384.16
7	72417323	rs390915	T	C	242.95
7	72417326	rs74771908	G	C	244.95
7	72470276	rs187201162	T	C	157.84
7	72470292		A	G	127.43
7	74299438	rs201514193	C	A	745.16
7	76069902	rs1804905	G	C	366.16
7	76153866	rs10263734	T	C	1155.22
7	92236486		C	A	2621.14
7	99377571		T	C	951.15
7	100552050	rs200797612	A	G	410.16
7	100608823	rs35790618	G	T	590.16
7	100647126	rs201122604	A	G	214.93
7	100677572	rs60940057	A	G	866.16
7	100677995	rs149287079	A	G	478.16
7	100678372	rs11769823	T	G	202.49
7	100678610	rs78010183	A	T	292.16
7	100678616	rs113959201	G	A	316.16
7	100678622	rs77299546	G	A	291.16
7	100679070	rs200860412	A	C	169.16
7	100679240	rs144027969	G	C	233.24
7	100679316	rs199509433	T	A	574.16
7	100679318	rs200823544	A	C	572.16
7	123514896	rs6949082	G	T	738.23
7	126880464	rs10250895	G	A	409.26
7	141672620		G	T	279.16
7	142139831		G	A	867.16
7	143632340		C	A	569.16
7	143632341		C	A	571.16
7	148873586		C	A	338.16
7	150778424	rs9097	G	T	116.6
7	151078735	rs4141455	A	G	98.55
7	155251433	rs3735653	C	T	335.6
7	156974127	rs2301916	G	T	223.19
7	158835763		G	T	1561.16
8	2967905	rs73183532	A	G	241.91
8	2967906	rs73183533	G	A	235.91
8	7429799		G	A	88.65
8	18730023		G	A	1190.16
8	53535821		T	A	679.16
8	62491714		G	T	252.16
8	68423886		G	A	489.16
8	77763115		C	G	1582.16
8	82713832		C	A	182.16
8	88886276		C	A	814.16
8	100479718		C	A	2281.16
8	104390292		T	A	1619.16
8	104445009	rs1370005	T	G	611.55
8	113266556		C	G	1682.16
8	114389138		G	T	1370.16
8	117858389	rs4570	G	A	261.91
8	140715170		G	T	5609.16
8	141840645	rs4246127	G	A	314.21
8	145557497	rs7013127	A	C	303.19
8	145692110	rs2306388	C	T	283.46
9	2622278	rs2219143	G	A	100.04
9	34564846	rs2296940	G	A	2139.16
9	36058802	rs150902264	C	CT	229.51
9	37862124	rs41278313	A	T	104.56
9	67046254		A	C	141.73
9	69082052	rs144439877	C	A	50.57
9	71094505		G	A	497.16
9	72071247		G	A	4032.16
9	79333348	rs201933644	G	C	566.16
9	79333350	rs199947014	A	T	571.16
9	91657037		G	T	2984.16
9	95846868		G	C	3186.17
9	100459578	rs1800975	T	C	124.95
9	117168962		G	A	3943.16
9	117666529		C	G	772.16
9	119188049		C	T	783.16
9	128201271	rs111458512	C	T	4012.16
9	129338974		G	A	689.16
9	130434441		G	A	937.16
9	133248387		A	C	81.7
9	136270319	rs28489061	T	C	377.36
9	137544637		G	T	1121.16
9	138557938		C	T	3347.16
9	139412310		C	A	3107.16
9	139887042	rs10870159	G	C	137.57
9	141069844	rs62581042	T	C	1051.48
10	16962028		G	A	4040.16
10	44112763	rs7069748	C	G	404.55
10	46113563		G	A	811.16
10	47916013	rs187960913	C	A	75.55
10	49633875	rs201968887	T	A	114.65
10	50376276		C	A	1360.16
10	60548127		T	C	664.16
10	68381588		G	A	335.16
10	82394292	rs141264608	AG	A	568.12
10	86237293		G	T	709.16
10	94050988	rs746842	C	G	245.55
10	95259775	rs41290212	C	T	94.91
10	96447965		A	G	3598.16
10	97923216	rs145355745	C	CA	682.13
10	103360943		G	T	2826.16
10	116595317		C	G	1309.16
10	118609117		A	G	4607.16
10	120445472		G	A	245.17
10	120883117		CTT	C	306.2
10	127668487	rs2176097	G	A	553.48
10	134218296	rs10747057	C	G	54.16
10	134598780		T	C	119.62
10	135237166	rs2492666	G	A	141.38
10	135237196	rs4838682	C	T	98.62
11	193096	rs2280539	T	C	2091.19
11	726178	rs28498399	G	C	161.73
11	1157429		C	T	1615.16
11	1263138	rs190014960	G	A	1013.16
11	1279486	rs2249550	A	G	1028.41
11	1643036	rs58877168	A	C	133.92
11	2930395	rs10832891	G	C	59.15
11	4562969	rs144617165	A	AATTTT	311.46
11	4827283	rs919899	A	T	338.36
11	4827322	rs934485	A	G	178.91
11	5153669		C	CA	1035.12
11	5530590		C	T	2794.16
11	5877977		G	T	270.16
11	6651810	rs2659872	A	G	204.55
11	7025536		C	A	2010.16
11	10631247	rs3741042	C	T	372.17
11	18536215	rs12574333	G	T	1413.16
11	20142448	rs78606106	T	C	415.77
11	34937697	rs2016814	T	C	67.61
11	44081501		C	A	4313.16
11	44100335		G	T	1158.16
11	48346916	rs77069283	G	C	1184.17
11	48347130	rs77395846	C	G	844.16
11	48373900	rs77877396	A	G	211.19
11	49813519		G	T	185.21
11	50380180		G	A	1382.16
11	55633245		C	A	2114.16
11	56468416	rs11228735	G	A	1197.57
11	56468720	rs66943455	T	C	322.16
11	59271016		C	T	405.21
11	59271017		C	T	400.21
11	60541396	rs201061468	C	T	3754.16
11	64809167	rs10792456	A	G	202.32
11	65318625	rs201866318	G	C	5630.16
11	70189927		C	T	1593.16
11	71726473		C	G	628.16
11	74046861	rs7941916	C	T	580.23
11	75141630	rs11236430	T	C	176.73
11	75562967		A	G	1501.16
11	76572008		C	T	3289.16
11	99690212	rs12292548	C	T	238.16
11	101868255		G	T	4616.16
11	102395660	rs61749259	G	A	379.41
11	102395661	rs61751460	C	T	378.32
11	102713620	rs679620	T	C	512.6
11	124746274		A	G	186.64
12	3149212		G	T	252.16
12	9313730		C	A	763.16
12	9313731		C	A	738.16
12	9318826		G	A	913.16
12	10560240		C	A	1155.16
12	14943564		G	A	4793.16
12	39760168		G	C	1981.16
12	40716129		C	A	4390.16
12	41582603	rs10879831	G	C	99.18
12	43945607		G	C	2542.16
12	49433712		G	T	2190.16
12	49442594		G	T	1079.16
12	51388283		A	C	746.16
12	56090254		C	G	777.16
12	69978623	rs12319536	A	C	69.16
12	71523199	rs143821581	TAA	T	401.61
12	71533630		T	G	851.16
12	75601185		C	A	3037.16
12	80900348	rs7965277	T	G	285.05
12	81613794		A	G	838.16
12	81799574		G	T	3023.16
12	97051632	rs10710617	AT	A	450.53
12	98926621		AAAGTG	A	2175.12
12	104152838		C	T	2169.16
12	113531305	rs1674095	A	T	318.6
12	121341762	rs7966446	C	T	55.6
12	123893243	rs145203010	C	T	1201.16
12	133049806		C	T	264.6
12	133159733	rs11550079	C	T	138.02
12	133808222		C	A	932.16
13	20006620	rs147012324	C	T	425.16
13	25160976		C	G	720.16
13	25535913		T	A	230.22
13	25745067		T	A	398.39
13	27998769	rs1049302	T	C	180.73
13	33232411		G	C	1473.14
13	43491778	rs199595584	G	A	298.36
13	46563082		T	A	13788.14
13	49037877	rs121913295	G	T	959.14
13	66877710		C	A	1381.14
13	112724075		A	T	2006.14
13	113558322		C	T	2721.14
14	21250585		C	A	779.16
14	31562167		G	A	390.16
14	32034147	rs3759779	A	T	76.55
14	33291988		A	T	724.16
14	53174000		G	T	2683.16
14	62262227	rs141962974	ATAACT	A	329.51
14	64427407		T	G	1490.16
14	67807242	rs33973037	TA	T	218.1
14	71568683	rs34093157	T	A	61.61
14	74060508	rs35724886	C	A	948.17
14	74759243		C	T	3260.16
14	74825272		T	G	1319.16
14	77843363	rs10141114	A	G	100.6
14	88450704		C	A	130.72
14	90783122		A	T	633.16
14	104643721	rs2487301	C	A	158.55
14	105268104	rs10141867	G	A	690.57
14	106347467	rs2516984	A	C	15348.9
14	106350696	rs2857368	A	G	15722.9
14	106354334	rs2516973	T	C	14563.9
14	106354353	rs2516972	C	T	14538.9
14	106356974	rs2753529	G	C	8696.9
14	106369534	rs2516960	A	G	9607.9
14	106370603	rs2857350	G	C	11410.9
14	106478464	rs80132192	T	C	2103.16
14	106478513	rs1141386	C	G	1282.16
14	106494503	rs17705658	G	A	3338.16
14	106518565	rs113460079	C	T	3491.16
14	106518738	rs112149134	C	A	3613.16
14	106518848	rs2073679	T	C	3116.16
14	106573559	rs10152051	A	G	4699.16
14	106586259	rs11625174	T	G	2000.16
14	106993738		T	G	130.57
14	107113846	rs201523378	A	G	2441.16
14	107113855	rs111637096	A	G	2482.16
14	107113858	rs111853090	A	G	2770.16
15	22319166	rs1429505	G	T	640.16
15	22319497	rs1366875	G	C	1047.29
15	22369340		A	C	1116.16
15	22483137	rs4779321	G	A	1567.16
15	23890947		G	T	722.16
15	25415825	rs1883009	C	T	904.57
15	26793249	rs139370891	C	T	2215.16
15	30850247	rs186233928	T	C	64.29
15	33936562		C	A	3405.16
15	41612013		T	TA	346.15
15	43067427		T	C	1818.16
15	43296078		T	C	1085.16
15	44599410	rs74723222	C	T	148.23
15	49033871		G	T	275.16
15	49061215		C	G	879.16
15	49437200		CT	C	1077.12
15	54025227		C	A	1276.16
15	62246554	rs17238266	T	C	390.55
15	62456088		C	T	202.16
15	65157118		C	T	2174.16
15	72104019		G	T	3327.16
15	76995213		T	A	1599.16
15	77197745	rs907594	C	A	159.69
15	77907399		G	T	5201.16
15	78212605	rs4479193	T	C	883.6
15	78272330	rs56081051	C	T	2004.16
15	82523358	rs11073036	G	A	618.91
16	1493491	rs12929054	T	G	64.17
16	15248720	rs75000738	C	A	86.92
16	25704145	rs2943336	A	G	64.55
16	25719769		G	T	726.16
16	28847211		C	T	422.16
16	30958522		G	A	579.16
16	33380011		G	C	1021.16
16	34274536		T	C	1434.16
16	53934556	rs16952634	G	A	241.16
16	54968239	rs1133611	A	G	504.17
16	56970563		G	C	3979.16
16	57250000	rs199854828	A	T	79.77
16	70367548	rs148606610	C	T	201.16
16	71606378		A	G	1272.14
16	81129800		C	T	103.23
16	88709828	rs1049254	A	G	102.64
16	89576879	rs201692335	G	GT	85.9
17	1577830		T	C	2032.14
17	4439727	rs3053652	T	TGG	317.49
17	4693342	rs35910358	C	A	185.58
17	4837210	rs2586529	A	G	101.36
17	5036281	rs76236903	G	C	535.16
17	7577610		T	A	8629.14
17	8066107	rs2304909	G	A	244.18
17	10323550		C	T	1974.14
17	10431064		C	A	4322.14
17	13446837	rs73294029	G	A	1233.14
17	15517284	rs200934978	G	C	1119.14
17	15603021	rs12452845	T	C	1325.16
17	15603031	rs12450403	G	T	1226.16
17	19265797	rs10445411	C	T	465.95
17	19528283		A	G	1998.16
17	21204153	rs66883103	C	T	357.16
17	21204187	rs56067280	G	T	314.16
17	21204192	rs56216806	C	T	351.16
17	21205604	rs62057722	T	C	176.16
17	21208331	rs1898407	G	A	1044.16
17	21217690	rs2363194	C	T	767.2
17	21217727	rs2363370	T	C	438.16
17	21319955	rs76506689	G	A	243.16
17	21320008	rs78435971	C	T	163.24
17	21320012	rs77515828	C	T	156.17
17	21562283	rs78871793	C	A	319.16
17	25640464	rs71680410	TA	T	105.53
17	26885462		G	T	667.16
17	30593206	rs117530048	G	A	121.22
17	35503593		A	G	54.18
17	36353761	rs62074778	C	T	1849.16
17	37366899	rs35966204	T	TG	251.22
17	39262015		T	C	858.16
17	39274157	rs145503152	G	A	1069.16
17	42266899	rs145889254	A	G	8400.14
17	43625348	rs201776882	C	T	926.16
17	45214690	rs74390782	G	A	395.55
17	45234760		C	A	443.16
17	45534105		A	T	257.16
17	45534108		C	T	245.16
17	48447297		A	C	1845.14
17	53848505		T	C	2293.16
17	56378572		C	A	87.16
17	62076077	rs62070903	C	G	472.67
17	67188668	rs8074259	T	C	382.06
17	72889685	rs2683274	G	A	668.16
17	73735773		G	T	9656.14
17	79615225	rs7406494	G	T	156.73
18	6942295	rs733918	T	C	148.55
18	10677693		C	A	1262.16
18	10742574		C	T	918.16
18	18530004	rs14462	C	G	974.16
18	23845110		CT	C	629.12
18	23845112		T	C	644.16
18	23969868		G	T	720.16
18	28721913	rs12458870	C	T	193.29
18	29052298		G	T	2015.16
18	42435226	rs661251	T	G	171.91
18	58038514		C	A	628.16
18	66513666		G	T	341.16
18	77254230		T	C	245.16
18	77703270		A	G	335.16
19	290947	rs8111051	C	A	156.56
19	616999	rs8103738	A	G	169.91
19	1074720		G	A	244.16
19	1491113		G	T	123.27
19	2015449		G	A	161.19
19	4217587	rs58333777	G	A	198.58
19	4217762		A	C	51.56
19	4217767		G	T	54.56
19	4511890	rs200897749	G	A	753.16
19	6897458		C	A	2384.16
19	7831443		C	A	991.16
19	7964375		A	G	2686.16
19	8575819		C	A	193.91
19	10073485		G	T	551.16
19	10531364	rs112273932	G	T	102.55
19	12624683		G	A	1228.16
19	15364976		T	C	1770.16
19	15989405	rs1126433	C	T	229.17
19	18304069		C	G	442.16
19	21606389		G	A	75.69
19	23927793		G	T	68.78
19	23927797		T	A	80.61
19	36806314	rs148976822	A	G	108.22
19	38987116		G	T	544.16
19	38987117	rs78915828	G	T	592.16
19	39360720	rs8110393	G	A	121.56
19	41355843		GC	G	4429.12
19	41415946		T	C	4869.16
19	43448156	rs55931787	G	A	240.19
19	43544621	rs62110997	A	T	319.16
19	44891168		G	T	4900.16
19	46389326	rs113663555	C	T	196.64
19	49106935	rs138269435	G	A	100.04
19	50037446	rs73582463	C	G	61.92
19	50100295	rs3745475	A	G	54.12
19	51200295		C	A	1181.16
19	52562237	rs12151270	G	C	295.17
19	54651950		C	G	1366.16
19	54725835	rs201948566	G	C	124.18
19	55666202		G	T	5059.16
19	56283159		C	T	190.27
19	56954043		G	A	1164.16
20	1895826	rs17855611	G	A	184.5
20	3361908	rs2008901	G	A	108.91
20	3605678	rs78113220	C	G	280.16
20	3654433	rs2271511	C	T	59.57
20	9424810	rs6039471	A	C	158.26
20	9496133		T	C	1320.16
20	13370718		C	A	538.16
20	23970627		C	A	4113.16
20	24523767		G	T	3330.16
20	25754132	rs78557488	T	A	221.2
20	25900135	rs11699441	C	A	659.16
20	29632506		T	C	55.55
20	29637917	rs74459129	T	A	1043.16
20	29637960	rs80038911	G	A	816.17
20	30450332		C	T	1821.16
20	31954680		C	T	3679.16
20	32965829	rs78903106	CT	C	99.18
20	33585105		G	A	2353.16
20	34763422		G	C	675.16
20	36789997		C	A	1917.16
20	40877327		C	A	2572.16
20	43090568		C	T	546.16
20	44351099		G	T	1392.16
20	60989365	rs3810553	C	T	197.46
21	10942914		C	A	851.16
21	15671655	rs1297119	C	T	215.6
21	19165262	rs5842661	CA	C	380.59
21	19653538		C	T	434.16
21	28210821		C	A	1427.16
21	31797751		T	A	1613.16
21	40186226		A	G	485.16
21	45390749	rs10669784	TA	T	96.22
21	46876580	rs8133886	C	T	115.15
22	16084840		G	A	998.16
22	17602164	rs62237785	C	G	151.05
22	18860832	rs145288430	G	C	72.36
22	20296729	rs58499303	T	C	225.16
22	20714894	rs200656718	G	C	968.16
22	22681848		GTC	G	905.12
22	22707275	rs5995854	C	A	412.16
22	22707299	rs34503659	A	C	377.16
22	22707309	rs35779014	C	T	288.16
22	22730634	rs2009587	G	A	472.16
22	22890752	rs17497512	A	G	519.16
22	22985432		G	A	3914.16
22	23046741	rs5759380	A	C	622.16
22	23047069	rs5751529	C	A	602.16
22	23047290	rs9623875	G	A	391.16
22	23054916	rs5759408	G	T	643.16
22	23090006	rs62220367	G	A	977.16
22	23101132	rs34258613	A	C	398.99
22	23235909		C	T	1083.16
22	23523082	rs199698427	G	GC	182.69
22	24640618		C	G	948.16
22	35937568	rs2272861	G	A	96.55
22	36897381		C	G	828.17
22	42908095	rs111729042	T	C	210.16
22	43617201		C	A	8637.17
22	50589094		C	T	2549.16
22	50693497	rs79916248	A	G	119.2
22	50693501	rs76251763	G	A	125.18
X	11683075	rs3990475	A	G	421.04
X	11779538	rs2107422	A	G	1822.9
X	11783502	rs5933922	G	C	2704.9
X	11786839	rs2525868	T	C	1471.9
X	12725701	rs6641078	C	G	3995.9
X	12739294	rs3827468	A	G	2318.9
X	12740118	rs17321823	T	C	400.05
X	12827261	rs17281523	T	C	1016.9
X	12837558	rs5935399	C	T	2385.9
X	12838934	rs917580	A	G	1338.9
X	12847377	rs6639228	C	G	875.91
X	12848933	rs1266365	T	C	1321.9
X	12849523	rs5935402	C	T	1309.9
X	47918130		T	C	71.61
X	48819932		G	A	4841.14
X	105201380		T	G	1108.14
X	114424552		C	A	1184.14
X	118145948		G	A	5078.14
X	125685870		AC	A	6113.1
X	125685872		G	A	5063.14
X	135432175		C	G	3894.14
X	140993852	rs176038	C	G	200.17
X	140993859	rs6634333	T	A	185.55
X	140993864	rs34836042	T	C	104.56
Y	4966373		A	C	2554.14
