# Supplementary material for: Next-Generation Sequence Analysis of Cancer Xenograft Models
Source: PLoS One. 2013 Sep 26;8(9):e74432. doi: 10.1371/journal.pone.0074432 (PMC3784448; doi:10.1371/journal.pone.0074432)
Supplement: Dataset S5 — SNPs effects common to both the cell line and xenograft samples (only one transcript of the moderate and high impact effects are reported. (PDF) [file pone.0074432.s013.pdf]

## Sheet: SNP eff common cell line xeno
Dataset S5. SNPs effects common to both the cell line and xenograft samples (only one transcript of the moderate and high impact effects are reported
Chrom	Pos	ID	Ref	Alt	Gene	Codon	Amino Acid	Effect
1	12854414	rs1063769	G	A	PRAMEF1	cGc/cAc	R213H	NON_SYNONYMOUS_CODING
1	12854474	rs1063774	A	C	PRAMEF1	aAt/aCt	N233T	NON_SYNONYMOUS_CODING
1	12854479	rs1063775	C	G	PRAMEF1	Cgc/Ggc	R235G	NON_SYNONYMOUS_CODING
1	12887375		A	T	PRAMEF11	aTg/aAg	M161K	NON_SYNONYMOUS_CODING
1	25599086		G	C	RHD	tgG/tgC	W16C	NON_SYNONYMOUS_CODING
1	43223488		C	T	LEPRE1	gGa/gAa	G349E	NON_SYNONYMOUS_CODING
1	43919413	rs6692611	A	G	HYI	Tcc/Ccc	S18P	NON_SYNONYMOUS_CODING
1	47904000	rs78469326	G	A	FOXD2	Gca/Aca	A65T	NON_SYNONYMOUS_CODING
1	62673287	rs2457828	A	C	L1TD1	aaA/aaC	K329N	NON_SYNONYMOUS_CODING
1	65864496		C	G	DNAJC6	gCt/gGt	A610G	NON_SYNONYMOUS_CODING
1	112298709		G	T	DDX20	Gat/Tat	D55Y	NON_SYNONYMOUS_CODING
1	154744706		C	A	KCNN3	cGg/cTg	R398L	NON_SYNONYMOUS_CODING
1	167849781		G	T	ADCY10	Ctg/Atg	L210M	NON_SYNONYMOUS_CODING
1	176659417		C	A	PAPPA2	aCa/aAa	T761K	NON_SYNONYMOUS_CODING
1	203799286		G	A	ZC3H11A	Gaa/Aaa	E219K	NON_SYNONYMOUS_CODING
1	228494790	rs435776	G	A	OBSCN	Gga/Aga	G4039R	NON_SYNONYMOUS_CODING
1	228503677	rs1150912	A	G	OBSCN	cAc/cGc	H4381R	NON_SYNONYMOUS_CODING
1	228504472	rs1188732	T	C	OBSCN	Tgc/Cgc	C4450R	NON_SYNONYMOUS_CODING
1	228504670	rs11810627	C	T	OBSCN	Cgg/Tgg	R4516W	NON_SYNONYMOUS_CODING
1	228505668	rs1188729	C	G	OBSCN	tCt/tGt	S4642C	NON_SYNONYMOUS_CODING
1	228509427	rs373610	A	G	OBSCN	gAc/gGc	D4962G	NON_SYNONYMOUS_CODING
1	228520973	rs369909	C	G	OBSCN	Ctc/Gtc	L5269V	NON_SYNONYMOUS_CODING
1	231076227		GT	G	TTC13	-	-196	FRAME_SHIFT
1	240370985	rs111896385	C	T	FMN2	cCt/cTt	P958L	NON_SYNONYMOUS_CODING
1	248039261		C	T	TRIM58	Cgc/Tgc	R311C	NON_SYNONYMOUS_CODING
1	248790146		C	A	OR2T11	gGc/gTc	G95V	NON_SYNONYMOUS_CODING
2	20990103		CAA	C	C2orf43	-	-70	FRAME_SHIFT
2	23926235		A	C	KLHL29	gAg/gCg	E762A	NON_SYNONYMOUS_CODING
2	71061037		A	G	CD207	aTg/aCg	M102T	NON_SYNONYMOUS_CODING
2	103040370		GC	G	IL18RAP	-	-57	FRAME_SHIFT
2	119604331		C	G	EN1	gGa/gCa	G138A	NON_SYNONYMOUS_CODING
2	148716428	rs2307394	T	C	ORC4	aAt/aGt	N4S	NON_SYNONYMOUS_CODING
2	163083033		C	A	FAP	Gga/Tga	G64*	STOP_GAINED
2	207530673		A	G	DYTN	tTt/tCt	F354S	NON_SYNONYMOUS_CODING
2	239039637	rs4663845	T	C	ESPNL	gTg/gCg	V761A	NON_SYNONYMOUS_CODING
2	241558439		G	C	GPR35	tGc/tCc	C27S	NON_SYNONYMOUS_CODING
2	241659323	rs191428830	C	A	KIF1A	cGg/cTg	R1529L	NON_SYNONYMOUS_CODING
3	75786888	rs1615736	C	T	ZNF717	cGt/cAt	R629H	NON_SYNONYMOUS_CODING
3	173322773		G	A	NLGN1	Gtc/Atc	V129I	NON_SYNONYMOUS_CODING
3	186358252		G	C	FETUB	atG/atC	M1I	START_LOST
3	190026193		G	A	CLDN1	gCt/gTt	A170V	NON_SYNONYMOUS_CODING
4	15004655	rs7435318	G	A	CPEB2	Gac/Aac	D120N	NON_SYNONYMOUS_CODING
4	62849145		G	T	LPHN3	ttG/ttT	L952F	NON_SYNONYMOUS_CODING
4	62849146		G	T	LPHN3	Gct/Tct	A953S	NON_SYNONYMOUS_CODING
4	88766145		A	G	MEPE	aAa/aGa	K42R	NON_SYNONYMOUS_CODING
4	110384668		C	A	SEC24B	Cac/Aac	H249N	NON_SYNONYMOUS_CODING
4	184205534		C	G	WWC2	taC/taG	Y1013*	STOP_GAINED
5	9630020		G	A	TAS2R1	gCt/gTt	A42V	NON_SYNONYMOUS_CODING
5	45262121		C	A	HCN1	Gca/Tca	A859S	NON_SYNONYMOUS_CODING
5	114477023		C	A	TRIM36	Gtg/Ttg	V274L	NON_SYNONYMOUS_CODING
5	114477024		C	A	TRIM36	caG/caT	Q273H	NON_SYNONYMOUS_CODING
5	177164044	rs200041092	G	A	FAM153A	aCg/aTg	T134M	NON_SYNONYMOUS_CODING
6	1391085	rs111257067	G	GGGC	FOXF2	-/GGC	-302G	CODON_INSERTION
6	7310259	rs10004	A	G	SSR1	tTg/tCg	L28S	NON_SYNONYMOUS_CODING
6	7374207	rs2876098	T	G	CAGE1	gAg/gCg	E146A	NON_SYNONYMOUS_CODING
6	10942964	rs3798751	A	G	SYCP2L	Aac/Gac	N647D	NON_SYNONYMOUS_CODING
6	16290848	rs147049568	T	TAC	GMPR	-/AC	-285?	FRAME_SHIFT
6	16306751	rs16885	G	A	ATXN1	Cct/Tct	P753S	NON_SYNONYMOUS_CODING
6	17633033	rs61744976	G	C	NUP153	tCt/tGt	S836C	NON_SYNONYMOUS_CODING
6	25914853	rs34525648	G	A	SLC17A2	tCg/tTg	S370L	NON_SYNONYMOUS_CODING
6	26370660	rs12205731	G	A	BTN3A2	Gcc/Acc	A140T	NON_SYNONYMOUS_CODING
6	27216699	rs5030965	G	T	PRSS16	aGc/aTc	S104I	NON_SYNONYMOUS_CODING
6	29760352	rs140982245	CGCGGGCGCCGTGGATGGAGCA	C	LOC554223	ccgcgggcgccgtggatggagcag/ccg	PRAPWMEQ146P	CODON_DELETION
6	32552059	rs17883134	G	T	HLA-DRB1	tCc/tAc	S66Y	NON_SYNONYMOUS_CODING
6	32552067	rs17882603	C	T	HLA-DRB1	Gga/Aga	G55R	NON_SYNONYMOUS_CODING
6	32609965	rs7990	C	A	HLA-DQA1	gCt/gAt	A183D	NON_SYNONYMOUS_CODING
6	32610009	rs2308891	C	G	HLA-DQA1	Cag/Gag	Q198E	NON_SYNONYMOUS_CODING
6	32632700	rs1140313	T	A	HLA-DQB1	cAg/cTg	Q85L	NON_SYNONYMOUS_CODING
6	33048628	rs1042136	A	C	HLA-DPB1	Atc/Ctc	I94L	NON_SYNONYMOUS_CODING
6	33048663	rs1042153	G	A	HLA-DPB1	atG/atA	M105I	NON_SYNONYMOUS_CODING
6	52874250	rs55694702	G	C	ICK	agC/agG	S536R	NON_SYNONYMOUS_CODING
6	85446419		G	T	TBX18	tCt/tAt	S603Y	NON_SYNONYMOUS_CODING
6	90497589	rs4707569	A	C	MDN1	Ttt/Gtt	F440V	NON_SYNONYMOUS_CODING
6	132859802		G	T	TAAR9	tGt/tTt	C125F	NON_SYNONYMOUS_CODING
6	147012309		G	A	ADGB	Gtg/Atg	V457M	NON_SYNONYMOUS_CODING
7	751055		C	T	PRKAR1B	Gtc/Atc	V30I	NON_SYNONYMOUS_CODING
7	27170145	rs6944345	T	G	HOXA4	Act/Cct	T70P	NON_SYNONYMOUS_CODING
7	45632441		G	T	ADCY1	aaG/aaT	K241N	NON_SYNONYMOUS_CODING
7	45632442		G	T	ADCY1	Gcg/Tcg	A242S	NON_SYNONYMOUS_CODING
7	64864487		G	A	ZNF92	gGc/gAc	G418D	NON_SYNONYMOUS_CODING
7	72209576		C	G	TYW1B	Gat/Cat	D161H	NON_SYNONYMOUS_CODING
7	76069902	rs1804905	G	C	ZP3	aGg/aCg	R294T	NON_SYNONYMOUS_CODING
7	100647126	rs201122604	A	G	MUC12	Aac/Gac	N4428D	NON_SYNONYMOUS_CODING
7	100677572	rs60940057	A	G	MUC17	Act/Gct	T959A	NON_SYNONYMOUS_CODING
7	100677995	rs149287079	A	G	MUC17	Agc/Ggc	S1100G	NON_SYNONYMOUS_CODING
7	100678610	rs78010183	A	T	MUC17	Act/Tct	T1305S	NON_SYNONYMOUS_CODING
7	100678616	rs113959201	G	A	MUC17	Ggt/Agt	G1307S	NON_SYNONYMOUS_CODING
7	100678622	rs77299546	G	A	MUC17	Gtg/Atg	V1309M	NON_SYNONYMOUS_CODING
7	100679070	rs200860412	A	C	MUC17	aAa/aCa	K1458T	NON_SYNONYMOUS_CODING
7	100679240	rs144027969	G	C	MUC17	Gca/Cca	A1515P	NON_SYNONYMOUS_CODING
7	100679316	rs199509433	T	A	MUC17	gTc/gAc	V1540D	NON_SYNONYMOUS_CODING
7	100679318	rs200823544	A	C	MUC17	Acc/Ccc	T1541P	NON_SYNONYMOUS_CODING
7	123514896	rs6949082	G	T	HYAL4	Gca/Tca	A346S	NON_SYNONYMOUS_CODING
7	143632340		C	A	OR2F2	aaC/aaA	N5K	NON_SYNONYMOUS_CODING
7	143632341		C	A	OR2F2	Cag/Aag	Q6K	NON_SYNONYMOUS_CODING
7	148873586		C	A	ZNF398	Ctg/Atg	L230M	NON_SYNONYMOUS_CODING
7	155251433	rs3735653	C	T	EN2	Ctc/Ttc	L121F	NON_SYNONYMOUS_CODING
7	158835763		G	T	VIPR2	tCt/tAt	S187Y	NON_SYNONYMOUS_CODING
8	68423886		G	A	CPA6	Ctc/Ttc	L108F	NON_SYNONYMOUS_CODING
8	100479718		C	A	VPS13B	tgC/tgA	C1174*	STOP_GAINED
8	104390292		T	A	CTHRC1	cTa/cAa	L123Q	NON_SYNONYMOUS_CODING
8	145557497	rs7013127	A	C	SCRT1	Tct/Gct	S133A	NON_SYNONYMOUS_CODING
9	91657037		G	T	SHC3	Ccc/Acc	P422T	NON_SYNONYMOUS_CODING
9	95846868		G	C	SUSD3	Gac/Cac	D203H	NON_SYNONYMOUS_CODING
9	117168962		G	A	DFNB31	Cca/Tca	P254S	NON_SYNONYMOUS_CODING
10	16962028		G	A	CUBN	gCg/gTg	A2252V	NON_SYNONYMOUS_CODING
10	96447965		A	G	CYP2C18	Agg/Ggg	R139G	NON_SYNONYMOUS_CODING
10	116595317		C	G	FAM160B1	Cag/Gag	Q106E	NON_SYNONYMOUS_CODING
10	118609117		A	G	ENO4	Agg/Ggg	R14G	NON_SYNONYMOUS_CODING
10	134218296	rs10747057	C	G	PWWP2B	Cgc/Ggc	R98G	NON_SYNONYMOUS_CODING
11	5153669		C	CA	OR52A5	-/T	-68?	FRAME_SHIFT
11	5530590		C	T	UBQLN3	Ggc/Agc	G67S	NON_SYNONYMOUS_CODING
11	48346916	rs77069283	G	C	OR4C3	Gtg/Ctg	V142L	NON_SYNONYMOUS_CODING
11	48347130	rs77395846	C	G	OR4C3	gCc/gGc	A213G	NON_SYNONYMOUS_CODING
11	71726473		C	G	NUMA1	agG/agC	R692S	NON_SYNONYMOUS_CODING
11	75562967		A	G	UVRAG	Att/Gtt	I53V	NON_SYNONYMOUS_CODING
11	102713620	rs679620	T	C	MMP3	Aaa/Gaa	K45E	NON_SYNONYMOUS_CODING
12	14943564		G	A	WBP11	Cat/Tat	H379Y	NON_SYNONYMOUS_CODING
12	39760168		G	C	KIF21A	tCt/tGt	S296C	NON_SYNONYMOUS_CODING
12	40716129		C	A	LRRK2	Ctt/Att	L1776I	NON_SYNONYMOUS_CODING
12	41582603	rs10879831	G	C	PDZRN4	Ggg/Cgg	G116R	NON_SYNONYMOUS_CODING
12	49433712		G	T	MLL2	tCg/tAg	S2614*	STOP_GAINED
12	75601185		C	A	KCNC2	gaG/gaT	E193D	NON_SYNONYMOUS_CODING
12	80900348	rs7965277	T	G	PTPRQ	gTa/gGa	V647G	NON_SYNONYMOUS_CODING
12	81613794		A	G	ACSS3	Atg/Gtg	M485V	NON_SYNONYMOUS_CODING
12	98926621		AAAGTG	A	TMPO	-	-196	FRAME_SHIFT
12	133159733	rs11550079	C	T	FBRSL1	gCc/gTc	A836V	NON_SYNONYMOUS_CODING
12	133808222		C	A	LOC647589	caG/caT	Q86H	NON_SYNONYMOUS_CODING
13	25745067		T	A	FAM123A	Acc/Tcc	T231S	NON_SYNONYMOUS_CODING
13	49037877	rs121913295	G	T	RB1	tGt/tTt	C706F	NON_SYNONYMOUS_CODING
14	31562167		G	A	AP4S1	Ggc/Agc	G121S	NON_SYNONYMOUS_CODING
14	33291988		A	T	AKAP6	Atc/Ttc	I1657F	NON_SYNONYMOUS_CODING
14	53174000		G	T	PSMC6	gaG/gaT	E35D	NON_SYNONYMOUS_CODING
14	74060508	rs35724886	C	A	ACOT4	gCt/gAt	A187D	NON_SYNONYMOUS_CODING
14	74825272		T	G	VRTN	Tca/Gca	S596A	NON_SYNONYMOUS_CODING
14	77843363	rs10141114	A	G	TMED8	Tcc/Ccc	S12P	NON_SYNONYMOUS_CODING
14	90783122		A	T	C14orf102	agT/agA	S69R	NON_SYNONYMOUS_CODING
15	23890947		G	T	MAGEL2	cCc/cAc	P648H	NON_SYNONYMOUS_CODING
15	33936562		C	A	RYR3	Ctc/Atc	L1203I	NON_SYNONYMOUS_CODING
15	43067427		T	C	TTBK2	gAt/gGt	D635G	NON_SYNONYMOUS_CODING
15	43296078		T	C	UBR1	Aca/Gca	T1156A	NON_SYNONYMOUS_CODING
15	49033871		G	T	CEP152	agC/agA	S1284R	NON_SYNONYMOUS_CODING
15	49061215		C	G	CEP152	Gtt/Ctt	V616L	NON_SYNONYMOUS_CODING
15	49437200		CT	C	COPS2	-	-43	FRAME_SHIFT
15	54025227		C	A	WDR72	caG/caT	Q40H	NON_SYNONYMOUS_CODING
15	76995213		T	A	SCAPER	cAg/cTg	Q547L	NON_SYNONYMOUS_CODING
15	77907399		G	T	LINGO1	Cgc/Agc	R284S	NON_SYNONYMOUS_CODING
16	25704145	rs2943336	A	G	HS3ST4	cAg/cGg	Q136R	NON_SYNONYMOUS_CODING
16	30958522		G	A	FBXL19	Gag/Aag	E686K	NON_SYNONYMOUS_CODING
17	1577830		T	C	PRPF8	Aat/Gat	N1069D	NON_SYNONYMOUS_CODING
17	4693342	rs35910358	C	A	GLTPD2	gaC/gaA	D209E	NON_SYNONYMOUS_CODING
17	5036281	rs76236903	G	C	USP6	aGc/aCc	S91T	NON_SYNONYMOUS_CODING
17	15517284	rs200934978	G	C	CDRT1	gCa/gGa	A245G	NON_SYNONYMOUS_CODING
17	21204187	rs56067280	G	T	MAP2K3	cGg/cTg	R65L	NON_SYNONYMOUS_CODING
17	21204192	rs56216806	C	T	MAP2K3	Cgg/Tgg	R67W	NON_SYNONYMOUS_CODING
17	45214690	rs74390782	G	A	CDC27	Cgg/Tgg	R581W	NON_SYNONYMOUS_CODING
17	53848505		T	C	PCTP	Tac/Cac	Y100H	NON_SYNONYMOUS_CODING
18	23969868		G	T	TAF4B	ttG/ttT	L827F	NON_SYNONYMOUS_CODING
18	29052298		G	T	DSG3	gGa/gTa	G650V	NON_SYNONYMOUS_CODING
19	1074720		G	A	HMHA1	atG/atA	M367I	NON_SYNONYMOUS_CODING
19	2015449		G	A	BTBD2	gCg/gTg	A85V	NON_SYNONYMOUS_CODING
19	4217762		A	C	ANKRD24	Acg/Ccg	T869P	NON_SYNONYMOUS_CODING
19	7964375		A	G	LRRC8E	tAc/tGc	Y323C	NON_SYNONYMOUS_CODING
19	21606389		G	A	ZNF493	Gga/Aga	G182R	NON_SYNONYMOUS_CODING
19	23927793		G	T	ZNF681	Caa/Aaa	Q187K	NON_SYNONYMOUS_CODING
19	38987116		G	T	RYR1	cGg/cTg	R2244L	NON_SYNONYMOUS_CODING
19	39360720	rs8110393	G	A	RINL	cCc/cTc	P288L	NON_SYNONYMOUS_CODING
19	41355843		GC	G	CYP2A6	-	-74	FRAME_SHIFT
19	54651950		C	G	CNOT3	cCc/cGc	P321R	NON_SYNONYMOUS_CODING
19	54725835	rs201948566	G	C	LILRB3	Cgg/Ggg	R175G	NON_SYNONYMOUS_CODING
20	1895826	rs17855611	G	A	SIRPA	cGc/cAc	R54H	NON_SYNONYMOUS_CODING
20	9496133		T	C	LAMP5	gTg/gCg	V33A	NON_SYNONYMOUS_CODING
20	24523767		G	T	SYNDIG1	Gtg/Ttg	V12L	NON_SYNONYMOUS_CODING
20	33585105		G	A	MYH7B	Gcc/Acc	A1179T	NON_SYNONYMOUS_CODING
20	40877327		C	A	PTPRT	aGa/aTa	R771I	NON_SYNONYMOUS_CODING
20	44351099		G	T	SPINT4	gaG/gaT	E31D	NON_SYNONYMOUS_CODING
20	60989365	rs3810553	C	T	C20orf151	Gac/Aac	D348N	NON_SYNONYMOUS_CODING
21	28210821		C	A	ADAMTS1	tGt/tTt	C714F	NON_SYNONYMOUS_CODING
21	40186226		A	G	ETS2	Acc/Gcc	T212A	NON_SYNONYMOUS_CODING
22	24640618		C	G	GGT5	Gct/Cct	A26P	NON_SYNONYMOUS_CODING
22	36897381		C	G	FOXRED2	Gga/Cga	G375R	NON_SYNONYMOUS_CODING
22	43617201		C	A	SCUBE1	gaG/gaT	E509D	NON_SYNONYMOUS_CODING
X	125685870		AC	A	DCAF12L1	-	-241	FRAME_SHIFT
X	135432175		C	G	GPR112	Cac/Gac	H2104D	NON_SYNONYMOUS_CODING
X	140993852	rs176038	C	G	MAGEC1	aCt/aGt	T221S	NON_SYNONYMOUS_CODING
X	140993859	rs6634333	T	A	MAGEC1	agT/agA	S223R	NON_SYNONYMOUS_CODING
X	140993864	rs34836042	T	C	MAGEC1	tTt/tCt	F225S	NON_SYNONYMOUS_CODING
Y	4966373		A	C	PCDH11Y	Aag/Cag	K241Q	NON_SYNONYMOUS_CODING
