# Supplementary material for: Next-Generation Sequence Analysis of Cancer Xenograft Models
Source: PubMed Central journal article supplement (PMC3784448; doi:10.1371/journal.pone.0074432), 2013-09-26
Supplement: pone.0074432.s001.pdf [file pone.0074432.s001.pdf]

A

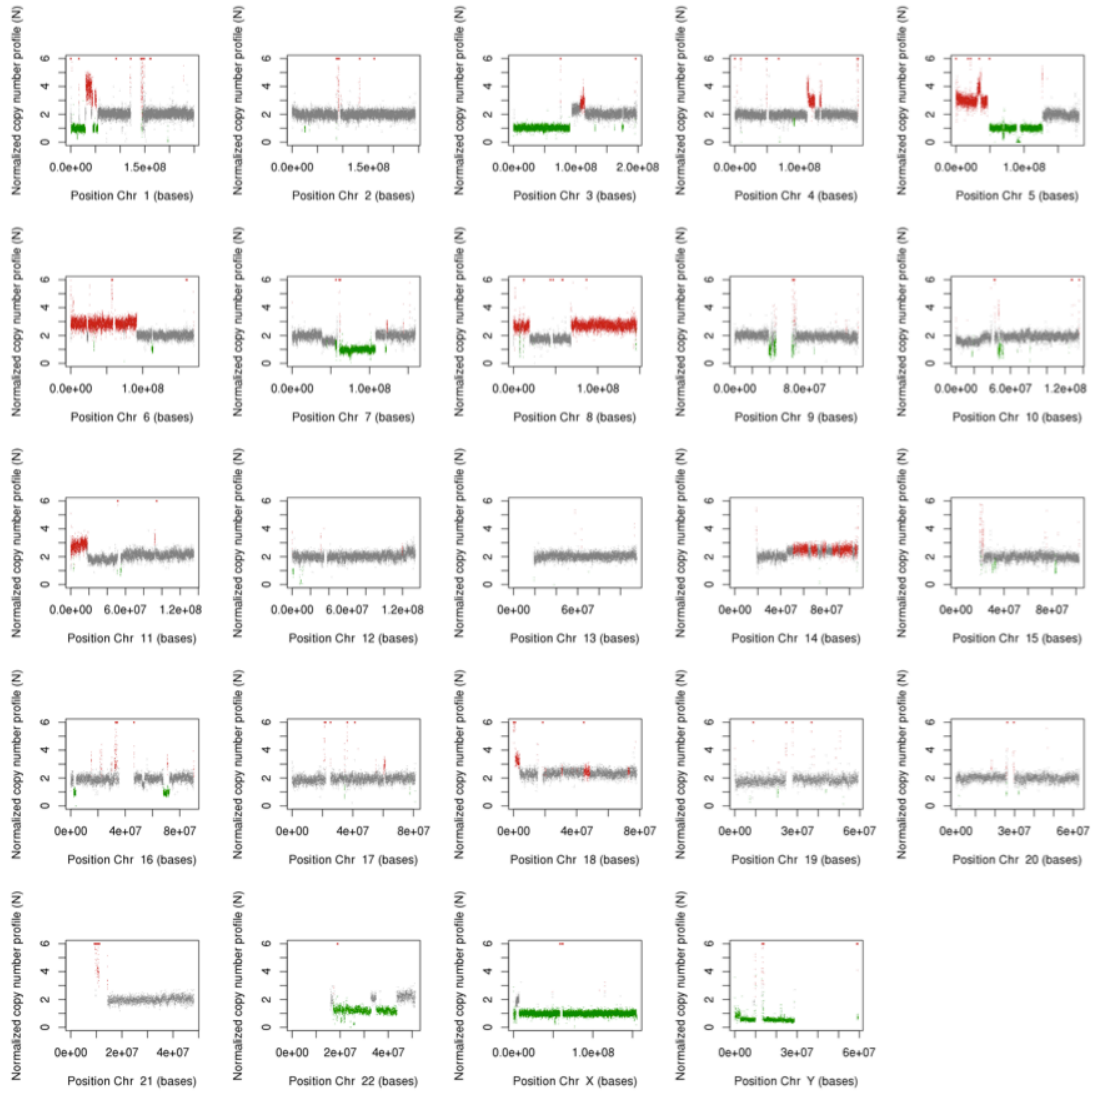

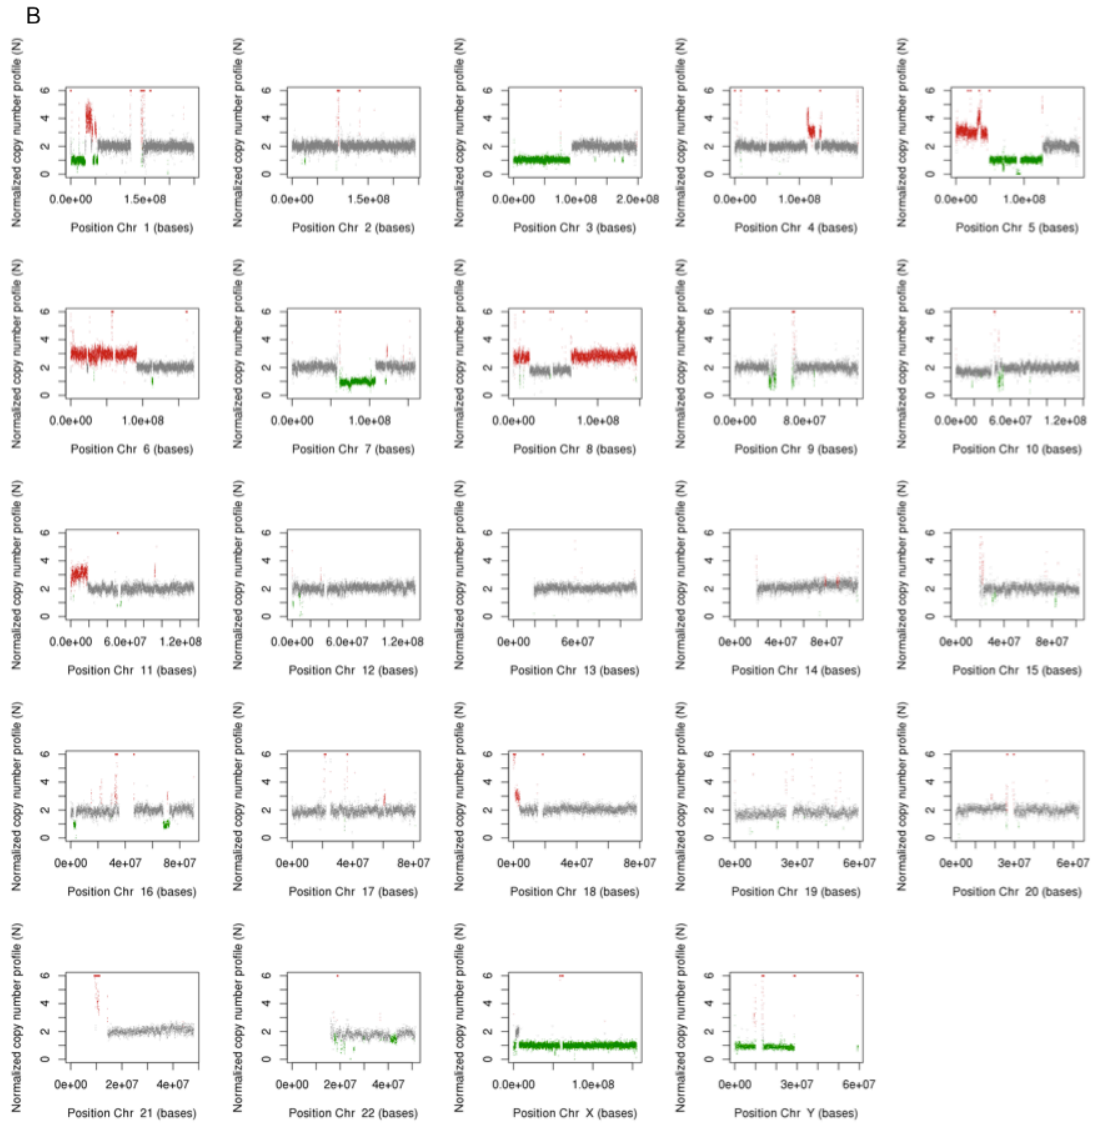

**Figure S1.** Copy number variation analysis. Complete human chromosome profile of the of CLH209 (A) cell line and a xenograft tumour derived from it (B).
