# Supplementary material for: Next-Generation Sequence Analysis of Cancer Xenograft Models
Source: PubMed Central journal article supplement (PMC3784448; doi:10.1371/journal.pone.0074432), 2013-09-26
Supplement: pone.0074432.s005.pdf [file pone.0074432.s005.pdf]

**Table S1.** Summary of the total and post QA/QC number of sequenced reads from each NGS experiment performed. Control: peripheral blood BL209, Cell line: NCI-H209; Xenograft: xenograft sample derived from the NCI-H209 cell line. LX22, LX33 and LX36: SCLC primary xenograft lines LX22, LX33 and LX36. The number of mapped reads for the xenograft samples are human-specific only. PE: pair-ends.

|                              | Exon capture       |                    |                    | Whole genome       |                    |                    | RNA-Seq            |                    |                    |
|------------------------------|--------------------|--------------------|--------------------|--------------------|--------------------|--------------------|--------------------|--------------------|--------------------|
|                              | Control            | Cell line          | Xenograft          | Control            | Cell line          | Xenograft          | LX22               | LX33               | LX36               |
| Total reads (no)             | 58 10 <sup>6</sup> | 66 10 <sup>6</sup> | 82 10 <sup>6</sup> | 66 10 <sup>6</sup> | 75 10 <sup>6</sup> | 78 10 <sup>6</sup> | 54 10 <sup>6</sup> | 86 10 <sup>6</sup> | 89 10 <sup>6</sup> |
| Passed QA/QC reads (PE, no.) | 52 10 <sup>6</sup> | 59 10 <sup>6</sup> | 74 10 <sup>6</sup> | 55 10 <sup>6</sup> | 65 10 <sup>6</sup> | 68 10 <sup>6</sup> | 47 10 <sup>6</sup> | 78 10 <sup>6</sup> | 80 10 <sup>6</sup> |
