# Supplementary material for: Next-Generation Sequence Analysis of Cancer Xenograft Models
Source: PubMed Central journal article supplement (PMC3784448; doi:10.1371/journal.pone.0074432), 2013-09-26
Supplement: pone.0074432.s006.pdf [file pone.0074432.s006.pdf]

**Table S2.** Summary of the alignments statistics of each NGS experiment performed. LX22, LX33 and LX36: SCLC primary xenograft lines LX22, LX33 and LX36. Control: peripheral blood BL209, Cell line: NCI-H209; Xenograft: xenograft sample derived from the NCI-H209 cell line. The number of mapped reads for the xenograft samples are human-specific only. For the exon capture and low-coverage whole genome analyses of the xenograft sample concordantly paired reads were analyzed.

|                           |           | Total reads mapped (no,%) | Pairs concordantly mapped (no, %) | Reads with Phred alignment score $\geq$ 20 (no, %) | Singletons (no., %) |
|---------------------------|-----------|---------------------------|-----------------------------------|----------------------------------------------------|---------------------|
| RNA-Seq                   | LX22      | 80,519,547 (86.1)         | 74,968,964 (80.0)                 | 75,945,281(94.3)                                   | 1,952,903 (2.0)     |
|                           | LX33      | 136,808,432 (88.0)        | 130,742,872 (92.0)                | 127,872,221 (93.5)                                 | 2,518,180 (1.6)     |
|                           | LX36      | 148,796,811(89.7)         | 137,261,948 (85.8)                | 135,272,944 (90.9)                                 | 2,566,927 (1.6)     |
| Exon capture              | Control   | 97,458,075 (94.2)         | 91,924,276 (88.8)                 | 82,441,340 (84.6)                                  | 2,112,581 (2.0)     |
|                           | Cell line | 112,171,412 (94.6)        | 106,747,096 (90.0)                | 97,449,340 (86.9)                                  | 2,112,467 (1.8)     |
|                           | Xenograft | 128,604,306 (87.2)        | 124,892,360 (84.6)                | 110,874,569 (86.2)                                 | (-.-)               |
| Low-coverage whole genome | Control   | 104,535,862 (94.1)        | 102,613,686 (92.3)                | 99,832,086 (95.5)                                  | 778,308 (0.7)       |
|                           | Cell line | 123,505,627 (94.7)        | 121,364,648 (93.0)                | 118,273,136 (95.8)                                 | 828165 (0.6)        |
|                           | Xenograft | 96,493,162 (70.9)         | 94,676,296 (69.6)                 | 92,869,442 (96.2)                                  | 362 (-.-)           |
