# Supplementary material for: Next-Generation Sequence Analysis of Cancer Xenograft Models
Source: PubMed Central journal article supplement (PMC3784448; doi:10.1371/journal.pone.0074432), 2013-09-26
Supplement: pone.0074432.s007.pdf [file pone.0074432.s007.pdf]

**Table S3.** Summary of the depth of coverage obtained for the exon capture (A) and low pass whole genome (B) experiments. Control: peripheral blood BL209, Cell line: NCI-H209; Xenograft: xenograft sample derived from the NCI-H209 cell line. The results of the xenograft sample only represent those reads that were human specific. Depth of coverage was estimated on whole reads.

**A**

|                       |           | Depth of coverage (mean) | Bases covered at least X times (%) |      |      |      |      | Duplication levels (%) |
|-----------------------|-----------|--------------------------|------------------------------------|------|------|------|------|------------------------|
|                       |           |                          | 1X                                 | 3 X  | 5 X  | 7 X  | 10 X |                        |
| Low pass whole genome | Control   | 3.5                      | 94.4                               | 63.6 | 26.3 | 8.8  | 1.1  | 0.4                    |
|                       | Cell line | 4.2                      | 95.1                               | 70.7 | 39.3 | 16.8 | 3.3  | 0.4                    |
|                       | Xenograft | 3.3                      | 91.5                               | 57.6 | 25.3 | 8.5  | 1.3  | 0.2                    |

**B**

|              |           | Depth of coverage (mean) | Bases covered at least X times (%) |      |      |      |       | Duplication levels (%) |
|--------------|-----------|--------------------------|------------------------------------|------|------|------|-------|------------------------|
|              |           |                          | 15 X                               | 30 X | 50 X | 75 X | 100 X |                        |
| Exon capture | Control   | 107.2                    | 93.9                               | 83.2 | 66.9 | 49.1 | 35.6  | 10.0                   |
|              | Cell line | 108.6                    | 94.5                               | 84.7 | 68.5 | 50.3 | 36.6  | 10.0                   |
|              | Xenograft | 136.1                    | 95.2                               | 87.4 | 74.7 | 59.3 | 46.4  | 15.4                   |
