# Supplementary material for: Next-Generation Sequence Analysis of Cancer Xenograft Models
Source: PubMed Central journal article supplement (PMC3784448; doi:10.1371/journal.pone.0074432), 2013-09-26
Supplement: pone.0074432.s008.pdf [file pone.0074432.s008.pdf]

**Table S4.** Table describing sample-specific single nucleotide variants. (A) Xenograft-specific non-synonymous coding variants. (B) Cell line specific non-synonymous coding variants. For sample-specific variants, approximate read depth is shown (reads with MQ=255 or with bad mates were filtered). Read and allelic depth of the sample where the variant was not identified were calculated on de-duplicated reads. NSC: non-synonymous coding variant.

**A**

| Variant genomic position (chr:position) | Id.         | Reference genome base | Alternative allele base | Gene modified | Predicted variant effect | Xenograft Sample |                                  | Cell Line Sample (variant not called) |                                  |
|-----------------------------------------|-------------|-----------------------|-------------------------|---------------|--------------------------|------------------|----------------------------------|---------------------------------------|----------------------------------|
|                                         |             |                       |                         |               |                          | Read depth (no.) | Allelic read depth (ref. : alt.) | Read depth (no.)                      | Allelic read depth (ref. : alt.) |
| chr1:6509142                            | .           | T                     | C                       | ESPN          | NSC-missense             | 10               | 6:4                              | -                                     | -:-                              |
| chr1:14925635                           | .           | C                     | T                       | KAZN          | NSC-missense             | 11               | 3:8                              | 8                                     | 8:-                              |
| chr1:14925653                           | .           | G                     | A                       | KAZN          | NSC-missense             | 8                | 2:6                              | 5                                     | 5:-                              |
| chr3:49725034                           | rs142964215 | T                     | A                       | APEH          | NSC-missense             | 82               | 71:19                            | 91                                    | 78:13                            |
| chr3:195453249                          | rs3828407   | T                     | C                       | MUC20         | NSC-missense             | 52               | 45:11                            | 43                                    | 38:5                             |
| chr7:100677645                          | rs114262718 | C                     | A                       | MUC17         | NSC-missense             | 147              | 127:36                           | 161                                   | 140:21                           |
| chr7:100679058                          | rs147856413 | A                     | G                       | MUC17         | NSC-missense             | 39               | 34:9                             | 30                                    | 28:2                             |
| chr7:100679197                          | .           | A                     | C                       | MUC17         | NSC-missense             | 29               | 25:6                             | 43                                    | 38:5                             |
| chr7:100679254                          | rs199808245 | A                     | G                       | MUC17         | NSC-missense             | 48               | 38:14                            | 71                                    | 60:11                            |
| chr7:100683053                          | rs200821451 | A                     | G                       | MUC17         | NSC-missense             | 43               | 32:15                            | 62                                    | 41:21                            |
| chr9:33385852                           | rs202183465 | C                     | T                       | AQP7          | NSC-missense             | 584              | 471:113                          | 452                                   | 379:72                           |
| chr19:53058153                          | .           | T                     | A                       | ZNF808        | NSC-missense             | 34               | 28:8                             | 36                                    | 36:-                             |
| chr19:53058157                          | .           | A                     | G                       | ZNF808        | NSC-missense             | 34               | 28:8                             | 40                                    | 40:-                             |
| chr19:53058173                          | .           | G                     | C                       | ZNF808        | NSC-missense             | 35               | 30:7                             | 45                                    | 45:-                             |
| chrX:114541228                          | .           | A                     | G                       | LUZP4         | NSC-missense             | 36               | 32:7                             | 30                                    | 30:3                             |

**B**

| Variant genomic position (chr:position) | Id.        | Reference genome base | Alternative allele base | Gene modified | Predicted variant effect | Cell Line Sample |                                  | Xenograft Sample (variants not called) |                                  |
|-----------------------------------------|------------|-----------------------|-------------------------|---------------|--------------------------|------------------|----------------------------------|----------------------------------------|----------------------------------|
|                                         |            |                       |                         |               |                          | Read depth (no.) | Allelic read depth (ref. : alt.) | Read depth (no.)                       | Allelic read depth (ref. : alt.) |
| chr3:49413009                           | rs11552758 | C                     | T                       | RHOA          | NSC-missense             | 73               | 44:35                            | 76                                     | 75,1                             |
| chr7:100684700                          | .          | T                     | C                       | MUC17         | NSC-missense             | 27               | 15:14                            | 54                                     | 45,9                             |
| chr7:100684701                          | .          | A                     | C                       | MUC17         | NSC-missense             | 28               | 16:14                            | 55                                     | 46,9                             |
| chr11:5717651                           | .          | C                     | A                       | TRIM22        | NSC-missense             | 108              | 95:23                            | 263                                    | 260,3                            |
| chr11:67767049                          | .          | G                     | T                       | UNC93B1       | NSC-missense             | 60               | 52:14                            | 135                                    | 135,-                            |
| chr11:95712127                          | .          | C                     | A                       | MAML2         | NSC-missense             | 80               | 65:23                            | 93                                     | 92,1                             |
| chr14:62203741                          | .          | A                     | C                       | HIF1A         | NSC-missense             | 51               | 35:20                            | 86                                     | 84,2                             |
| chr17:15449158                          | rs56222179 | A                     | G                       | FAM18B2-CDRT4 | NSC-missense             | 126              | 111:27                           | 199                                    | 186,13                           |
| chrX:19086859                           | .          | C                     | A                       | GPR64         | NSC-missense             | 36               | 28:10                            | 68                                     | 64,4                             |
